# Supplementary material for: Comprehensive Analysis of Differentially Expressed Genes and Epigenetic Modification-Related Expression Variation Induced by Saline Stress at Seedling Stage in Fiber and Oil Flax, Linum usitatissimum L
Source: MDPI journal article supplement (doi:10.3390/plants11152053), 2022-08-05
Supplement: s1 [file s1]

**Supplementary Figure S1:** The results of five genes expression compared RNA-seq and qRT-PCR in fanni (a) and longya10 (b), respectively. \*  $p < 0.05$ .

**Supplementary Figure S2:** The expression of genes related to photosynthesis-related pathways in leaves of flax under saline stress.

**Supplementary Table S1:** The overview of RNA-seq data.

**Supplementary Table S2:** The data of GO analysis.

**Supplementary Table S3:** The data of phytohormones related genes expression analysis.

**Supplementary Table S4:** The data of transcription factors related genes expression analysis.

**Supplementary Table S5:** The data of ionic transport related genes expression analysis.

**Supplementary Table S6:** The data of epigenetic modification related genes expression analysis.

**Supplementary Table S7:** The list of primers for qRT-PCR.
