# Supplementary material for: Comprehensive Analysis of Differentially Expressed Genes and Epigenetic Modification-Related Expression Variation Induced by Saline Stress at Seedling Stage in Fiber and Oil Flax, Linum usitatissimum L
Source: Plants (Basel). 2022 Aug 5;11(15):2053. doi: 10.3390/plants11152053 (PMC9370232; doi:10.3390/plants11152053)
Supplement: Supplementary file 1 [file plants-11-02053-s001.zip]

Archive with 10 entries (10 files):
- Supplementary Figure S1.tif
- Supplementary Figure S2.tif
- Supplementary Table S1.xlsx
- Supplementary Table S2.xlsx
- Supplementary Table S3.xlsx
- Supplementary Table S4.xlsx
- Supplementary Table S5.xlsx
- Supplementary Table S6.xlsx
- Supplementary Table S7.xlsx
- SupplementaryMaterials_Legends.pdf
