# Supplementary material for: Comprehensive Analysis of Differentially Expressed Genes and Epigenetic Modification-Related Expression Variation Induced by Saline Stress at Seedling Stage in Fiber and Oil Flax, Linum usitatissimum L
Source: Plants (Basel). 2022 Aug 5;11(15):2053. doi: 10.3390/plants11152053 (PMC9370232; doi:10.3390/plants11152053)
Supplement: Supplementary file 1 [file plants-11-02053-s001.zip › Supplementary Table S1.xlsx]

## Sheet: Sheet1
Data quality control
sample	Raw reads	Clean reads	GC(%)	Q30(%)
M−Fn−L1	51618938	50183016	49.2	92.7
M−Fn−L2	48766502	47367796	49.3	93.1
M−Fn−L3	51670948	50371114	48.9	93.4
S−Fn−L1	61200240	59821174	48.9	93.4
S−Fn−L2	43520800	42540556	48.6	93.6
S−Fn−L3	43354332	42279234	48.9	93
M−Fn−R1	47829742	45774374	49	93.3
M−Fn−R2	42080494	40163970	48.6	93.4
M−Fn−R3	44471192	42319624	49	93.2
S−Fn−R1	64396802	58548562	49.7	93.3
S−Fn−R2	51737056	47202624	48	92.5
S−Fn−R3	52174746	49381620	51.9	93.2
M−Ly−L1	51393922	49974008	49.7	93.5
M−Ly−L2	52532474	51286240	48.9	93.6
M−Ly−L3	43731866	42734812	49	94.4
S−Ly−L1	54731770	53322978	48.7	92.6
S−Ly−L2	55286614	53126622	49.1	93
S−Ly−L3	46368022	45272338	48.5	93.6
M−Ly−R1	56976890	54842766	48.8	93
M−Ly−R2	43559832	41994332	49	93.6
M−Ly−R3	44606882	42474350	49.1	93.2
S−Ly−R1	55539736	52510456	50.1	93.3
S−Ly−R2	49153108	46900044	49.4	93.2
S−Ly−R3	43413666	40389940	50.1	93
