# Supplementary material for: Comprehensive Analysis of Differentially Expressed Genes and Epigenetic Modification-Related Expression Variation Induced by Saline Stress at Seedling Stage in Fiber and Oil Flax, Linum usitatissimum L
Source: Plants (Basel). 2022 Aug 5;11(15):2053. doi: 10.3390/plants11152053 (PMC9370232; doi:10.3390/plants11152053)
Supplement: Supplementary file 1 [file plants-11-02053-s001.zip › Supplementary Table S2.xlsx]

## Sheet: S−Fn−R vs M−Fn−R
GO_acc	term_type	Term	Number of DEGs	querytotal	bgitem	bgtotal	pvalue	FDR
GO:0009987	BP	cellular process	4118	10305	8287	22108	1e-05	0.069
GO:0044237	BP	cellular metabolic process	3318	10305	6673	22108	0.00014	0.34
GO:0044260	BP	cellular macromolecule metabolic process	2673	10305	5322	22108	0.00016	0.34
GO:0044267	BP	cellular protein metabolic process	1571	10305	3043	22108	0.00022	0.36
GO:1901576	BP	organic substance biosynthetic process	1598	10305	3107	22108	0.00031	0.36
GO:0044249	BP	cellular biosynthetic process	1571	10305	3053	22108	0.00033	0.36
GO:0044271	BP	cellular nitrogen compound biosynthetic process	1241	10305	2389	22108	0.00057	0.42
GO:0006464	BP	cellular protein modification process	1160	10305	2226	22108	0.00064	0.42
GO:0036211	BP	protein modification process	1160	10305	2226	22108	0.00064	0.42
GO:0009059	BP	macromolecule biosynthetic process	1254	10305	2423	22108	0.00078	0.42
GO:0043232	CC	intracellular non-membrane-bounded organelle	486	10305	916	22108	0.01	1
GO:0043228	CC	non-membrane-bounded organelle	486	10305	916	22108	0.01	1
GO:0043229	CC	intracellular organelle	1144	10305	2275	22108	0.014	1
GO:0043226	CC	organelle	1144	10305	2275	22108	0.014	1
GO:0005871	CC	kinesin complex	73	10305	114	22108	0.021	1
GO:0004672	MF	protein kinase activity	873	10305	1661	22108	0.0016	1
GO:0016773	MF	phosphotransferase activity, alcohol group as acceptor	964	10305	1848	22108	0.0017	1
GO:0016772	MF	transferase activity, transferring phosphorus-containing groups	1103	10305	2148	22108	0.0032	1
GO:0032559	MF	adenyl ribonucleotide binding	1158	10305	2264	22108	0.0036	1
GO:0016301	MF	kinase activity	962	10305	1863	22108	0.0038	1

## Sheet: S−Fn−L vs M−Fn−L
GO_acc	term_type	Term	Number of DEGs	querytotal	bgitem	bgtotal	pvalue	FDR
GO:0006412	BP	translation	422	7253	679	22108	1.4e-24	2.9e-21
GO:0006518	BP	peptide metabolic process	432	7253	702	22108	1.6e-24	2.9e-21
GO:0043043	BP	peptide biosynthetic process	424	7253	686	22108	2.3e-24	2.9e-21
GO:0043604	BP	amide biosynthetic process	424	7253	686	22108	2.3e-24	2.9e-21
GO:0043603	BP	cellular amide metabolic process	432	7253	709	22108	6.4e-24	6.5e-21
GO:1901566	BP	organonitrogen compound biosynthetic process	559	7253	1017	22108	6.6e-23	5.6e-20
GO:1901564	BP	organonitrogen compound metabolic process	676	7253	1342	22108	2.2e-20	1.6e-17
GO:0044237	BP	cellular metabolic process	2530	7253	6673	22108	5.7e-14	3.6e-11
GO:0015979	BP	photosynthesis	109	7253	124	22108	1.9e-13	1.1e-10
GO:0008152	BP	metabolic process	3892	7253	10799	22108	6.1e-13	3.1e-10
GO:0005840	CC	ribosome	344	7253	482	22108	1.7e-27	1.6e-24
GO:1990904	CC	ribonucleoprotein complex	369	7253	564	22108	2e-24	6e-22
GO:0030529	CC	intracellular ribonucleoprotein complex	369	7253	564	22108	2e-24	6e-22
GO:0043232	CC	intracellular non-membrane-bounded organelle	465	7253	916	22108	1.1e-14	2e-12
GO:0043228	CC	non-membrane-bounded organelle	465	7253	916	22108	1.1e-14	2e-12
GO:0003735	MF	structural constituent of ribosome	345	7253	489	22108	6.3e-27	1.9e-23
GO:0005198	MF	structural molecule activity	352	7253	535	22108	1.2e-23	1.9e-20
GO:0003723	MF	RNA binding	223	7253	514	22108	0.0003	0.31
GO:0019843	MF	rRNA binding	24	7253	32	22108	0.0022	1
GO:0005524	MF	ATP binding	772	7253	2107	22108	0.0032	1

## Sheet: S−Ly−R vs M−Ly−R
GO_acc	term_type	Term	queryitem	querytotal	bgitem	bgtotal	pvalue	FDR
GO:0009987	BP	cellular process	2717	6616	8287	22108	8.5e-08	0.00045
GO:0065007	BP	biological regulation	794	6616	2194	22108	9.5e-07	0.0022
GO:0050789	BP	regulation of biological process	767	6616	2116	22108	1.2e-06	0.0022
GO:0050794	BP	regulation of cellular process	749	6616	2069	22108	1.9e-06	0.0022
GO:0032774	BP	RNA biosynthetic process	549	6616	1473	22108	4.1e-06	0.0022
GO:0008152	BP	metabolic process	3438	6616	10799	22108	4.6e-06	0.0022
GO:2001141	BP	regulation of RNA biosynthetic process	480	6616	1272	22108	6.2e-06	0.0022
GO:0006355	BP	regulation of transcription, DNA-templated	480	6616	1272	22108	6.2e-06	0.0022
GO:1903506	BP	regulation of nucleic acid-templated transcription	480	6616	1272	22108	6.2e-06	0.0022
GO:0097659	BP	nucleic acid-templated transcription	545	6616	1468	22108	6.3e-06	0.0022
GO:0043232	CC	intracellular non-membrane-bounded organelle	338	6616	916	22108	0.00051	0.12
GO:0043228	CC	non-membrane-bounded organelle	338	6616	916	22108	0.00051	0.12
GO:0005871	CC	kinesin complex	59	6616	114	22108	0.00059	0.12
GO:0015630	CC	microtubule cytoskeleton	89	6616	193	22108	0.0006	0.12
GO:0005875	CC	microtubule associated complex	66	6616	137	22108	0.0012	0.2
GO:0003700	MF	transcription factor activity, sequence-specific DNA binding	288	6616	662	22108	8.8e-08	0.00011
GO:0001071	MF	nucleic acid binding transcription factor activity	288	6616	662	22108	8.8e-08	0.00011
GO:0043565	MF	sequence-specific DNA binding	169	6616	354	22108	6.1e-07	0.00052
GO:0015631	MF	tubulin binding	69	6616	132	22108	0.00017	0.11
GO:0008017	MF	microtubule binding	67	6616	130	22108	0.00029	0.15

## Sheet: S−Ly−L vs M−Ly−L
GO_acc	term_type	Term	queryitem	querytotal	bgitem	bgtotal	pvalue	FDR
GO:0015979	BP	photosynthesis	105	7472	124	22108	1e-11	5.7e-08
GO:0008152	BP	metabolic process	3889	7472	10799	22108	9.1e-07	0.0025
GO:0044237	BP	cellular metabolic process	2449	7472	6673	22108	1.6e-05	0.028
GO:0019684	BP	photosynthesis, light reaction	42	7472	52	22108	3.3e-05	0.044
GO:0009765	BP	photosynthesis, light harvesting	35	7472	41	22108	6.8e-05	0.073
GO:0009987	BP	cellular process	2962	7472	8287	22108	0.00048	0.43
GO:0046395	BP	carboxylic acid catabolic process	23	7472	27	22108	0.0012	0.91
GO:0044281	BP	small molecule metabolic process	374	7472	923	22108	0.0015	0.96
GO:0006520	BP	cellular amino acid metabolic process	109	7472	226	22108	0.0016	0.96
GO:0043436	BP	oxoacid metabolic process	221	7472	517	22108	0.002	1
GO:0009579	CC	thylakoid	61	7472	71	22108	1.5e-07	4.8e-05
GO:0044436	CC	thylakoid part	61	7472	71	22108	1.5e-07	4.8e-05
GO:0009521	CC	photosystem	59	7472	68	22108	1.8e-07	4.8e-05
GO:0034357	CC	photosynthetic membrane	60	7472	70	22108	1.9e-07	4.8e-05
GO:0009523	CC	photosystem II	38	7472	45	22108	4e-05	0.0079
GO:0035639	MF	purine ribonucleoside triphosphate binding	929	7472	2436	22108	0.00051	0.79
GO:0003824	MF	catalytic activity	3661	7472	10361	22108	0.00075	0.79
GO:0016741	MF	transferase activity, transferring one-carbon groups	171	7472	387	22108	0.0022	0.79
GO:0001882	MF	nucleoside binding	974	7472	2605	22108	0.0023	0.79
GO:0032549	MF	ribonucleoside binding	973	7472	2603	22108	0.0024	0.79
