# Supplementary material for: Comprehensive Analysis of Differentially Expressed Genes and Epigenetic Modification-Related Expression Variation Induced by Saline Stress at Seedling Stage in Fiber and Oil Flax, Linum usitatissimum L
Source: Plants (Basel). 2022 Aug 5;11(15):2053. doi: 10.3390/plants11152053 (PMC9370232; doi:10.3390/plants11152053)
Supplement: Supplementary file 1 [file plants-11-02053-s001.zip › Supplementary Table S3.xlsx]

## Sheet: ABA
	M−Fn−L	M−Fn−R	S−Fn−L	S−Fn−R	M−Ly−L	M−Ly−R	S−Ly−L	S−Ly−R	annotation	Mapman
Lus10001599	3.33333	69.6667	2.44099	1.12174	3.33333	82.6667	3.46467	26.7665	carotenoid cleavage dioxygenase 8	highly similar to ( 705) AT4G32810 | Symbols: CCD8, MAX4, ATCCD8 | CCD8 (CAROTENOID CLEAVAGE DIOXYGENASE 8); oxidoreductase, acting on single donors with incorporation of molecular oxygen, incorporation of two atoms of oxygen | chr4:15828348-15831299 FORWARDhighly similar to ( 779) loc_os01g54270 12001.m11591 protein retrotransposon protein, putative, unclassified COG3670 RPE65 no original descri…
Lus10005653	2.33333	3.33333	82.0273	1.12174	1.66667	4.66667	111.377	1.3887	carotenoid cleavage dioxygenase 7	weakly similar to ( 141) AT2G44990 | Symbols: CCD7, MAX3, ATCCD7 | CCD7 (CAROTENOID CLEAVAGE DIOXYGENASE 7); 9-cis-epoxycarotenoid dioxygenase | chr2:18558938-18561621 FORWARDweakly similar to ( 115) loc_os04g46470 12004.m09596 protein dioxygenase RAMOSUS5, putative, expressed no original description
Lus10000500	4.33333	1.66667	21.3052	1.12174	7	2.33333	63.8509	9.72681	TSPO(outer membrane tryptophan-rich sensory protein)-related	very weakly similar to (87.8) AT2G47770 | Symbols: | benzodiazepine receptor-related | chr2:19568701-19569291 FORWARD no original description
Lus10037191	6.66667	233.333	2.09554	1.12174	19.3333	253.333	1.03726	12.3249	HVA22 homologue C	weakly similar to ( 191) AT1G69700 | Symbols: ATHVA22C | ATHVA22C | chr1:26220337-26221663 FORWARDweakly similar to ( 182) loc_os02g51290 12002.m10163 protein HVA22-like protein a, putative, expressed TB2_DP1_HVA22 no original description
Lus10009513	8.33333	131.333	3.84649	9.4041	22.3333	115.333	5.51291	53.7472	carotenoid cleavage dioxygenase 1	moderately similar to ( 216) AT3G63520 | Symbols: CCD1, ATCCD1, ATNCED1, NCED1 | CCD1 (CAROTENOID CLEAVAGE DIOXYGENASE 1); 9-cis-epoxycarotenoid dioxygenase | chr3:23452940-23455896 FORWARDhighly similar to ( 551) loc_os08g28240 12008.m06830 protein crocetin dialdehyde, putative, expressed RPE65 COG3670 no original description
Lus10023605	64.3333	79	45.3481	9.4041	129.333	102	90.7286	20.1854	HVA22 homologue A	moderately similar to ( 234) AT1G74520 | Symbols: ATHVA22A | ATHVA22A | chr1:28008109-28009156 REVERSEweakly similar to ( 107) HVA22_HORVU Protein HVA22 - Hordeum vulgare (Barley)moderately similar to ( 219) loc_os06g12220 12006.m05939 protein HVA22-like protein a, putative, expressed TB2_DP1_HVA22 no original description
Lus10013393	105	77.3333	1078.28	14.2688	189	77.3333	1262.46	162.442	aldehyde oxidase 2	nearly identical (1610) AT3G43600 | Symbols: AAO2 | AAO2 (ALDEHYDE OXIDASE 2); aldehyde oxidase | chr3:15512778-15517375 REVERSEnearly identical (1431) ALDO3_ORYSA Probable aldehyde oxidase 3 (EC 1.2.3.1) (AO-3) - Oryza sativa (Rice)nearly identical (1459) loc_os07g18120 12007.m06252 protein abscisic-aldehyde oxidase, putative, expressed Ald_Xan_dh_C2 XdhB CoxL XdhA PRK09970 PRK09800 FAD_binding_…
Lus10034519	67.3333	127.667	12.2225	14.2688	81	137.333	23.8502	30.1247	Abscisic acid-responsive (TB2/DP1, HVA22) family protein	moderately similar to ( 260) AT5G42560 | Symbols: | abscisic acid-responsive HVA22 family protein | chr5:17015703-17016969 FORWARDmoderately similar to ( 238) loc_os02g02920 12002.m100077 protein receptor expression-enhancing protein 3, putative, expressed no original description
Lus10033152	18	87.3333	19.2007	15.7296	23	80.3333	17.9781	33.2533	Abscisic acid-responsive (TB2/DP1, HVA22) family protein	moderately similar to ( 259) AT5G42560 | Symbols: | abscisic acid-responsive HVA22 family protein | chr5:17015703-17016969 FORWARDmoderately similar to ( 236) loc_os02g02920 12002.m100077 protein receptor expression-enhancing protein 3, putative, expressed no original description
Lus10008443	1	1.66667	6.63565	18.0629	1.66667	1	7.25171	1.04765	nine-cis-epoxycarotenoid dioxygenase 4	moderately similar to ( 317) AT4G19170 | Symbols: NCED4 | NCED4 (NINE-CIS-EPOXYCAROTENOID DIOXYGENASE 4) | chr4:10481835-10483622 FORWARDmoderately similar to ( 305) loc_os02g47510 12002.m09785 protein carotenoid cleavage dioxygenase 1, putative, expressed RPE65 COG3670 no original description
Lus10021241	2	511.333	1.74745	20.35	1.66667	479.333	3.7974	14.2627	carotenoid cleavage dioxygenase 7	highly similar to ( 695) AT2G44990 | Symbols: CCD7, MAX3, ATCCD7 | CCD7 (CAROTENOID CLEAVAGE DIOXYGENASE 7); 9-cis-epoxycarotenoid dioxygenase | chr2:18558938-18561621 FORWARDhighly similar to ( 646) loc_os04g46470 12004.m09596 protein dioxygenase RAMOSUS5, putative, expressed COG3670 RPE65 no original description
Lus10010281	1	1	2.0929	22.7644	1	1	2.76625	1.73386	TSPO(outer membrane tryptophan-rich sensory protein)-related	weakly similar to ( 125) AT2G47770 | Symbols: | benzodiazepine receptor-related | chr2:19568701-19569291 FORWARD no original description
Lus10008623	164	300.667	38.817	25.4458	123.333	286	58.6548	46.2947	HVA22 homologue A	moderately similar to ( 221) AT1G74520 | Symbols: ATHVA22A | ATHVA22A | chr1:28008109-28009156 REVERSEvery weakly similar to (89.0) HVA22_HORVU Protein HVA22 - Hordeum vulgare (Barley)moderately similar to ( 204) loc_os02g51290 12002.m10163 protein HVA22-like protein a, putative, expressed TB2_DP1_HVA22 no original description
Lus10004215	1.66667	1	2.44099	26.3453	3	2.33333	1.03726	1.04765	HVA22-like protein J	weakly similar to ( 200) AT2G36020 | Symbols: HVA22J | HVA22J (HVA22-LIKE PROTEIN J) | chr2:15123424-15125140 REVERSEmoderately similar to ( 202) loc_os03g14610 12003.m06901 protein receptor expression-enhancing protein 3, putative, expressed no original description
Lus10029419	6.33333	4.66667	4.19637	26.7644	9	5	5.87376	8.93077	HVA22-like protein J	weakly similar to ( 177) AT2G36020 | Symbols: HVA22J | HVA22J (HVA22-LIKE PROTEIN J) | chr2:15123424-15125140 REVERSEweakly similar to ( 173) loc_os03g14610 12003.m06901 protein receptor expression-enhancing protein 3, putative, expressed no original description
Lus10042829	1	1	1.04777	39.05	1	1.66667	1.03726	16.3681	carotenoid cleavage dioxygenase 1	weakly similar to ( 196) AT3G63520 | Symbols: CCD1, ATCCD1, ATNCED1, NCED1 | CCD1 (CAROTENOID CLEAVAGE DIOXYGENASE 1); 9-cis-epoxycarotenoid dioxygenase | chr3:23452940-23455896 FORWARDmoderately similar to ( 477) loc_os08g28240 12008.m06830 protein crocetin dialdehyde, putative, expressed RPE65 COG3670 no original description
Lus10040999	45.3333	182.667	25.5103	44.213	74	205.667	23.8891	136.204	GRAM domain-containing protein / ABA-responsive protein-related	moderately similar to ( 221) AT5G08350 | Symbols: | GRAM domain-containing protein / ABA-responsive protein-related | chr5:2686417-2687175 REVERSEmoderately similar to ( 214) loc_os02g42440 12002.m09279 protein FIP1, putative, expressed no original description
Lus10024234	127.333	122.333	78.8239	45.887	183.667	114	116.624	41.2425	HVA22 homologue A	moderately similar to ( 234) AT1G74520 | Symbols: ATHVA22A | ATHVA22A | chr1:28008109-28009156 REVERSEweakly similar to ( 106) HVA22_HORVU Protein HVA22 - Hordeum vulgare (Barley)moderately similar to ( 216) loc_os06g12220 12006.m05939 protein HVA22-like protein a, putative, expressed TB2_DP1_HVA22 no original description
Lus10010093	151.333	160.333	156.08	49.8829	136.667	147.333	231.214	103.59	HVA22-like protein K	moderately similar to ( 201) AT4G36720 | Symbols: HVA22K | HVA22K (HVA22-LIKE PROTEIN K) | chr4:17307769-17309668 FORWARDweakly similar to ( 176) loc_os07g38100 12007.m08059 protein receptor expression-enhancing protein 6, putative, expressed TB2_DP1_HVA22 no original description
Lus10024332	333.333	281	206.543	62.4997	311	284.667	259.292	120.366	Abscisic acid-responsive (TB2/DP1, HVA22) family protein	moderately similar to ( 274) AT5G42560 | Symbols: | abscisic acid-responsive HVA22 family protein | chr5:17015703-17016969 FORWARDmoderately similar to ( 230) loc_os10g09870 12010.m21839 protein receptor expression-enhancing protein 1, putative, expressed TB2_DP1_HVA22 no original description
Lus10010166	50.3333	12.3333	13.984	84.1574	23	10.6667	6.54349	2.75291	GRAM domain-containing protein / ABA-responsive protein-related	moderately similar to ( 222) AT5G08350 | Symbols: | GRAM domain-containing protein / ABA-responsive protein-related | chr5:2686417-2687175 REVERSEmoderately similar to ( 212) loc_os02g42440 12002.m09279 protein FIP1, putative, expressed no original description
Lus10019386	856.333	159.333	2915.14	85.3512	856.667	131.667	2033.79	156.091	aldehyde oxidase 2	nearly identical (1489) AT3G43600 | Symbols: AAO2 | AAO2 (ALDEHYDE OXIDASE 2); aldehyde oxidase | chr3:15512778-15517375 REVERSEnearly identical (1335) ALDO3_ORYSA Probable aldehyde oxidase 3 (EC 1.2.3.1) (AO-3) - Oryza sativa (Rice)nearly identical (1335) loc_os03g57680 12003.m10682 protein aldehyde oxidase 1, putative, expressed Ald_Xan_dh_C2 XdhB CoxL XdhA PRK09970 PRK09800 FAD_binding_5 CoxS …
Lus10037513	1	2	1.04777	86.7501	1.66667	1	1.03726	2.42006	TSPO(outer membrane tryptophan-rich sensory protein)-related	very weakly similar to (88.2) AT2G47770 | Symbols: | benzodiazepine receptor-related | chr2:19568701-19569291 FORWARD no original description
Lus10008429	429.667	209.667	1947.01	114.696	544.667	228.667	2159.21	396.622	aldehyde oxidase 2	nearly identical (1587) AT3G43600 | Symbols: AAO2 | AAO2 (ALDEHYDE OXIDASE 2); aldehyde oxidase | chr3:15512778-15517375 REVERSEnearly identical (1412) ALDOL_ORYSA Putative aldehyde oxidase-like protein - Oryza sativa (Rice)nearly identical (1438) loc_os07g18120 12007.m06252 protein abscisic-aldehyde oxidase, putative, expressed Ald_Xan_dh_C2 XdhB CoxL XdhA PRK09970 PRK09800 CoxS FAD_binding_5 Fe…
Lus10019342	1813.33	99	547.026	115.245	2351	114.667	586.434	84.8637	zeaxanthin epoxidase (ZEP) (ABA1)	highly similar to ( 785) AT5G67030 | Symbols: ABA1, LOS6, NPQ2, ATABA1, ZEP, IBS3, ATZEP | ABA1 (ABA DEFICIENT 1); zeaxanthin epoxidase | chr5:26754026-26757090 REVERSEhighly similar to ( 794) ABA2_NICPL Zeaxanthin epoxidase, chloroplast precursor (EC 1.14.13.90) - Nicotiana plumbaginifolia (Leadwort-leaved tobacco)highly similar to ( 809) loc_os04g37619 12004.m35575 protein zeaxanthin epoxidase,…
Lus10031190	645.333	279	989.663	138.252	566	288	740.161	277.306	molybdenum cofactor sulfurase (LOS5) (ABA3)	nearly identical (1010) AT1G16540 | Symbols: SIR3, LOS5, ABA3, ATABA3 | ABA3 (ABA DEFICIENT 3); Mo-molybdopterin cofactor sulfurase/ selenocysteine lyase | chr1:5659465-5665201 FORWARDhighly similar to ( 855) MOCOS_ORYSA Molybdenum cofactor sulfurase (EC 4.4.-.-) (MoCo sulfurase) (MOS) - Oryza sativa (Rice)highly similar to ( 855) loc_os06g45860 12006.m09114 protein molybdenum cofactor sulfurase,…
Lus10016974	302	173.333	854.166	140.845	210	149.667	1006.26	183.737	HVA22-like protein J	weakly similar to ( 198) AT2G36020 | Symbols: HVA22J | HVA22J (HVA22-LIKE PROTEIN J) | chr2:15123424-15125140 REVERSEweakly similar to ( 194) loc_os03g14610 12003.m06901 protein receptor expression-enhancing protein 3, putative, expressed no original description
Lus10035696	3278.67	172	170.787	143.561	4663.33	182	266.29	60.7897	nine-cis-epoxycarotenoid dioxygenase 4	highly similar to ( 733) AT4G19170 | Symbols: NCED4 | NCED4 (NINE-CIS-EPOXYCAROTENOID DIOXYGENASE 4) | chr4:10481835-10483622 FORWARDhighly similar to ( 602) loc_os02g47510 12002.m09785 protein carotenoid cleavage dioxygenase 1, putative, expressed RPE65 COG3670 no original description
Lus10040474	182.667	14.3333	7195.93	190.097	136.333	18.6667	4854.7	21.2168	aldehyde oxidase 2	nearly identical (1447) AT3G43600 | Symbols: AAO2 | AAO2 (ALDEHYDE OXIDASE 2); aldehyde oxidase | chr3:15512778-15517375 REVERSEnearly identical (1305) ALDO3_ORYSA Probable aldehyde oxidase 3 (EC 1.2.3.1) (AO-3) - Oryza sativa (Rice)nearly identical (1305) loc_os03g57680 12003.m10682 protein aldehyde oxidase 1, putative, expressed Ald_Xan_dh_C2 XdhB CoxL XdhA PRK09970 PRK09800 FAD_binding_5 CoxS …
Lus10040539	460.667	587.333	1002.66	191.607	484.333	682	1510.5	378.513	FH interacting protein 1	moderately similar to ( 300) AT1G28200 | Symbols: FIP1 | FIP1 (FH INTERACTING PROTEIN 1) | chr1:9850395-9852300 REVERSEmoderately similar to ( 278) loc_os03g08860 12003.m35053 protein FIP1, putative, expressed no original description
Lus10032557	491.333	328.667	1249.57	224.175	575.333	361.333	2360.35	403.044	HVA22 homologue E	weakly similar to ( 156) AT4G24960 | Symbols: ATHVA22D | ATHVA22D | chr4:12828401-12828982 FORWARDweakly similar to ( 148) HVA22_HORVU Protein HVA22 - Hordeum vulgare (Barley)weakly similar to ( 157) loc_os11g30500 12011.m06958 protein HVA22-like protein e, putative, expressed TB2_DP1_HVA22 YOP1 no original description
Lus10031386	5.66667	15	2.09469	228.704	10.3333	12.6667	11.0376	103.636	HVA22-like protein F	moderately similar to ( 231) AT2G42820 | Symbols: HVA22F | HVA22F (HVA22-LIKE PROTEIN F) | chr2:17817460-17818301 REVERSEweakly similar to ( 108) HVA22_HORVU Protein HVA22 - Hordeum vulgare (Barley)moderately similar to ( 231) loc_os01g52780 12001.m11451 protein TB2/DP1, HVA22 family protein, expressed TB2_DP1_HVA22 no original description
Lus10027897	437.667	75	1110.06	282.06	452.333	93.6667	1412.52	187.147	ABRE binding factor 4	moderately similar to ( 221) AT1G49720 | Symbols: ABF1 | ABF1 (ABSCISIC ACID RESPONSIVE ELEMENT-BINDING FACTOR 1); DNA binding / protein binding / transcription activator/ transcription factor | chr1:18400826-18402354 FORWARDweakly similar to ( 117) loc_os02g52780 12002.m33888 protein bZIP transcription factor ABI5, putative, expressed no original description
Lus10021299	77.3333	223.333	386.551	291.394	68.3333	186.333	398.19	258.394	HVA22-like protein J	weakly similar to ( 196) AT2G36020 | Symbols: HVA22J | HVA22J (HVA22-LIKE PROTEIN J) | chr2:15123424-15125140 REVERSEweakly similar to ( 188) loc_os03g14610 12003.m06901 protein receptor expression-enhancing protein 3, putative, expressed no original description
Lus10016410	1150.67	1100.67	1797.85	419.766	981.333	1026	1428.09	486.442	carotenoid cleavage dioxygenase 1	highly similar to ( 843) AT3G63520 | Symbols: CCD1, ATCCD1, ATNCED1, NCED1 | CCD1 (CAROTENOID CLEAVAGE DIOXYGENASE 1); 9-cis-epoxycarotenoid dioxygenase | chr3:23452940-23455896 FORWARDhighly similar to ( 808) loc_os12g44310 12012.m26998 protein 9,10-9,10 carotenoid cleavage dioxygenase 1, putative, expressed RPE65 COG3670 no original description
Lus10042193	1183	1905	398.351	459.449	1068.67	1846.67	627.693	609.952	Ribosomal protein S4	moderately similar to ( 327) AT5G39850 | Symbols: | 40S ribosomal protein S9 (RPS9C) | chr5:15950053-15951171 FORWARDweakly similar to ( 116) RS9_TOBAC 40S ribosomal protein S9 (S4) (Fragment) - Nicotiana tabacum (Common tobacco)moderately similar to ( 315) loc_os11g38959 12011.m80083 protein 40S ribosomal protein S9, putative, expressed rps4p TB2_DP1_HVA22 RpsD PMEI Ribosomal_S4 no original desc…
Lus10010944	9.66667	31.6667	8.02343	488.742	15.6667	29	22.0748	323.068	HVA22-like protein F	moderately similar to ( 230) AT2G42820 | Symbols: HVA22F | HVA22F (HVA22-LIKE PROTEIN F) | chr2:17817460-17818301 REVERSEweakly similar to ( 107) HVA22_HORVU Protein HVA22 - Hordeum vulgare (Barley)moderately similar to ( 227) loc_os01g52780 12001.m11451 protein TB2/DP1, HVA22 family protein, expressed TB2_DP1_HVA22 no original description
Lus10006489	445	240	3671.11	501.876	425.333	218	2450.53	757.651	abscisic acid responsive elements-binding factor 2	weakly similar to ( 184) AT1G45249 | Symbols: ABF2, AREB1 | ABF2 (ABSCISIC ACID RESPONSIVE ELEMENTS-BINDING FACTOR 2); DNA binding / protein binding / transcription activator/ transcription factor | chr1:17166189-17167415 REVERSEweakly similar to ( 138) loc_os02g52780 12002.m33888 protein bZIP transcription factor ABI5, putative, expressed no original description
Lus10000640	662	830.333	1806.45	506.752	685.333	764	2440.38	664.988	FH interacting protein 1	moderately similar to ( 296) AT1G28200 | Symbols: FIP1 | FIP1 (FH INTERACTING PROTEIN 1) | chr1:9850395-9852300 REVERSEmoderately similar to ( 273) loc_os03g08860 12003.m35053 protein FIP1, putative, expressed no original description
Lus10043186	258.667	382.667	854.036	602.318	249.333	357.333	1537.06	593.872	HVA22 homologue E	weakly similar to ( 152) AT5G50720 | Symbols: ATHVA22E, HVA22E | ATHVA22E | chr5:20633442-20634502 REVERSEweakly similar to ( 145) HVA22_HORVU Protein HVA22 - Hordeum vulgare (Barley)weakly similar to ( 154) loc_os11g30500 12011.m06958 protein HVA22-like protein e, putative, expressed TB2_DP1_HVA22 no original description
Lus10013445	54.6667	235.333	20.9483	720.36	85.3333	308.667	14.8786	734.021	GRAM domain-containing protein / ABA-responsive protein-related	moderately similar to ( 230) AT5G08350 | Symbols: | GRAM domain-containing protein / ABA-responsive protein-related | chr5:2686417-2687175 REVERSEmoderately similar to ( 225) loc_os02g42440 12002.m09279 protein FIP1, putative, expressed no original description
Lus10019850	177.667	182.667	1906.39	733.151	141	177.333	2312.4	501.563	abscisic acid responsive elements-binding factor 3	weakly similar to ( 156) AT1G49720 | Symbols: ABF1 | ABF1 (ABSCISIC ACID RESPONSIVE ELEMENT-BINDING FACTOR 1); DNA binding / protein binding / transcription activator/ transcription factor | chr1:18400826-18402354 FORWARDvery weakly similar to (85.1) loc_os02g52780 12002.m33888 protein bZIP transcription factor ABI5, putative, expressed no original description
Lus10042482	25.6667	12.6667	1078.78	907.553	30.6667	18.3333	1146.41	1210.95	nine-cis-epoxycarotenoid dioxygenase 9	moderately similar to ( 372) AT1G78390 | Symbols: NCED9, ATNCED9 | NCED9 (NINE-CIS-EPOXYCAROTENOID DIOXYGENASE 9); 9-cis-epoxycarotenoid dioxygenase | chr1:29490895-29492868 REVERSEmoderately similar to ( 330) loc_os12g42280 12012.m08007 protein viviparous-14, putative, expressed RPE65 COG3670 no original description
Lus10042481	12.6667	9.33333	794.848	913.264	17	11.3333	1289.96	897.89	nine-cis-epoxycarotenoid dioxygenase 9	moderately similar to ( 270) AT1G78390 | Symbols: NCED9, ATNCED9 | NCED9 (NINE-CIS-EPOXYCAROTENOID DIOXYGENASE 9); 9-cis-epoxycarotenoid dioxygenase | chr1:29490895-29492868 REVERSEmoderately similar to ( 244) loc_os03g44380 12003.m09477 protein 9-cis-epoxycarotenoid dioxygenase 2, putative, expressed RPE65 COG3670 no original description
Lus10026185	58.3333	34	4337.6	933.032	51	45.3333	4784.12	836.181	nine-cis-epoxycarotenoid dioxygenase 3	highly similar to ( 687) AT3G14440 | Symbols: NCED3, ATNCED3, STO1, SIS7 | NCED3 (NINE-CIS-EPOXYCAROTENOID DIOXYGENASE 3); 9-cis-epoxycarotenoid dioxygenase | chr3:4831678-4833477 REVERSEhighly similar to ( 622) loc_os03g44380 12003.m09477 protein 9-cis-epoxycarotenoid dioxygenase 2, putative, expressed RPE65 COG3670 no original description
Lus10002399	516.333	65.6667	2777.51	997.294	452	68.6667	3855.4	323.168	ABRE binding factor 4	weakly similar to ( 113) AT4G34000 | Symbols: ABF3, DPBF5 | ABF3 (ABSCISIC ACID RESPONSIVE ELEMENTS-BINDING FACTOR 3); DNA binding / protein binding / transcription activator/ transcription factor | chr4:16296008-16297594 FORWARDvery weakly similar to (96.3) loc_os01g64000 12001.m150782 protein ABA response element binding factor, putative, expressed no original description
Lus10031768	257.333	184.333	389.15	1005.26	250.667	162.333	333.004	453.461	molybdenum cofactor sulfurase (LOS5) (ABA3)	nearly identical (1002) AT1G16540 | Symbols: SIR3, LOS5, ABA3, ATABA3 | ABA3 (ABA DEFICIENT 3); Mo-molybdopterin cofactor sulfurase/ selenocysteine lyase | chr1:5659465-5665201 FORWARDhighly similar to ( 840) MOCOS_ORYSA Molybdenum cofactor sulfurase (EC 4.4.-.-) (MoCo sulfurase) (MOS) - Oryza sativa (Rice)highly similar to ( 840) loc_os06g45860 12006.m09114 protein molybdenum cofactor sulfurase,…
Lus10010279	1018.67	547.333	721.122	1213.33	983	489.667	662.043	1551.88	GRAM domain family protein	weakly similar to ( 188) AT2G22475 | Symbols: GEM | GEM (GL2-EXPRESSION MODULATOR) | chr2:9541523-9544778 FORWARDweakly similar to ( 187) loc_os09g29120 12009.m06063 protein FIP1, putative, expressed no original description
Lus10014066	659.667	504.667	7530.02	1489.14	572	453.667	9181.75	1031.04	ABRE binding factor 4	moderately similar to ( 266) AT4G34000 | Symbols: ABF3, DPBF5 | ABF3 (ABSCISIC ACID RESPONSIVE ELEMENTS-BINDING FACTOR 3); DNA binding / protein binding / transcription activator/ transcription factor | chr4:16296008-16297594 FORWARDweakly similar to ( 135) loc_os02g52780 12002.m33888 protein bZIP transcription factor ABI5, putative, expressed no original description
Lus10035154	191.667	296.333	718.149	1606.38	268.667	410	980.74	456.595	GRAM domain family protein	moderately similar to ( 281) AT5G13200 | Symbols: | GRAM domain-containing protein / ABA-responsive protein-related | chr5:4207081-4208079 FORWARDmoderately similar to ( 243) loc_os12g29400 12012.m06754 protein ABA-responsive protein, putative, expressed no original description
Lus10009755	268.333	291.333	2458.81	1985.51	235.667	269	1801.2	1330.24	abscisic acid responsive elements-binding factor 2	moderately similar to ( 206) AT1G45249 | Symbols: ABF2, AREB1 | ABF2 (ABSCISIC ACID RESPONSIVE ELEMENTS-BINDING FACTOR 2); DNA binding / protein binding / transcription activator/ transcription factor | chr1:17166189-17167415 REVERSEweakly similar to ( 140) loc_os02g52780 12002.m33888 protein bZIP transcription factor ABI5, putative, expressed no original description
Lus10034306	1138.67	1444.33	3956.38	2249.27	1256.67	1435.33	2723.77	1956.78	xanthine dehydrogenase 1	nearly identical (2116) AT4G34890 | Symbols: ATXDH1, XDH1 | XDH1 (XANTHINE DEHYDROGENASE 1); xanthine dehydrogenase | chr4:16618736-16624983 REVERSEmoderately similar to ( 494) ALDO1_ORYSA Probable aldehyde oxidase 1 (EC 1.2.3.1) (AO-1) - Oryza sativa (Rice)nearly identical (1941) loc_os03g31550 12003.m34889 protein xanthine dehydrogenase/oxidase, putative, expressed XdhB Ald_Xan_dh_C2 CoxL XdhA …
Lus10031986	529.667	780.333	876.44	2995.4	612.333	889.333	899.207	1263.3	GRAM domain family protein	moderately similar to ( 275) AT5G13200 | Symbols: | GRAM domain-containing protein / ABA-responsive protein-related | chr5:4207081-4208079 FORWARDmoderately similar to ( 244) loc_os12g29400 12012.m06754 protein ABA-responsive protein, putative, expressed no original description

## Sheet: CTK
	M−Fn−L	M−Fn−R	S−Fn−L	S−Fn−R	M−Ly−L	M−Ly−R	S−Ly−L	S−Ly−R	annotation	Mapman
Lus10038065	330.667	55.6667	95.5027	1.12174	386.333	59	105.406	20.093	cytokinin oxidase 7	moderately similar to ( 295) AT5G21482 | Symbols: CKX7, ATCKX5 | CKX7 (CYTOKININ OXIDASE 7); cytokinin dehydrogenase/ oxidoreductase | chr5:7226842-7230052 FORWARDweakly similar to ( 158) CKX1_MAIZE Cytokinin dehydrogenase 1 precursor (EC 1.5.99.12) (Cytokinin oxidase 1) (CKO 1) (COX 1) (ZmCKX1) - Zea mays (Maize)moderately similar to ( 241) loc_os08g35860 12008.m07575 protein cytokinin dehydroge…
Lus10038066	173.667	27.3333	68.2144	1.12174	212	27.3333	50.5852	16.6419	cytokinin oxidase 7	moderately similar to ( 266) AT5G21482 | Symbols: CKX7, ATCKX5 | CKX7 (CYTOKININ OXIDASE 7); cytokinin dehydrogenase/ oxidoreductase | chr5:7226842-7230052 FORWARDweakly similar to ( 168) CKX1_MAIZE Cytokinin dehydrogenase 1 precursor (EC 1.5.99.12) (Cytokinin oxidase 1) (CKO 1) (COX 1) (ZmCKX1) - Zea mays (Maize)moderately similar to ( 213) loc_os08g35860 12008.m07575 protein cytokinin dehydroge…
Lus10031778	3	4.66667	21.284	5.8693	2	2	77.7196	17.8186	cytokinin oxidase 3	weakly similar to ( 189) AT2G19500 | Symbols: CKX2, ATCKX2 | CKX2 (CYTOKININ OXIDASE 2); amine oxidase/ cytokinin dehydrogenase | chr2:8444311-8447301 REVERSEweakly similar to ( 132) CKX1_MAIZE Cytokinin dehydrogenase 1 precursor (EC 1.5.99.12) (Cytokinin oxidase 1) (CKO 1) (COX 1) (ZmCKX1) - Zea mays (Maize)weakly similar to ( 160) loc_os02g12770 12002.m06524 protein cytokinin dehydrogenase 1 pr…
Lus10003686	10.3333	162.333	15.0265	5.8693	19	166	8.68075	41.7035	CHASE domain containing histidine kinase protein	nearly identical (1266) AT2G01830 | Symbols: WOL, CRE1, WOL1, AHK4, ATCRE1 | WOL (WOODEN LEG); cytokinin receptor/ osmosensor/ phosphoprotein phosphatase/ protein histidine kinase | chr2:363332-367429 REVERSEweakly similar to ( 135) ETR1_PRUPE Ethylene receptor (EC 2.7.13.3) - Prunus persica (Peach)nearly identical (1055) loc_os03g50860 12003.m10071 protein histidine kinase, putative, expressed C…
Lus10020115	5.66667	53	3.14689	7.04381	9.66667	47.3333	2.40966	2.41186	histidine kinase 5	highly similar to ( 766) AT5G10720 | Symbols: AHK5, CKI2 | AHK5 (ARABIDOPSIS HISTIDINE KINASE 5); protein histidine kinase | chr5:3386835-3390541 FORWARDweakly similar to ( 132) ETR1_MALDO Ethylene receptor (EC 2.7.13.3) - Malus domestica (Apple) (Malus sylvestris)highly similar to ( 662) loc_os06g44410 12006.m08969 protein AHK5, putative, expressed PRK11107 PRK10841 PRK11466 PRK11091 BaeS PRK099…
Lus10031200	2	23.6667	37.746	7.20296	2.66667	39	24.6098	3.44731	cytokinin oxidase 2	moderately similar to ( 451) AT2G19500 | Symbols: CKX2, ATCKX2 | CKX2 (CYTOKININ OXIDASE 2); amine oxidase/ cytokinin dehydrogenase | chr2:8444311-8447301 REVERSEmoderately similar to ( 369) CKX1_MAIZE Cytokinin dehydrogenase 1 precursor (EC 1.5.99.12) (Cytokinin oxidase 1) (CKO 1) (COX 1) (ZmCKX1) - Zea mays (Maize)moderately similar to ( 386) loc_os02g12780 12002.m06525 protein cytokinin dehydr…
Lus10034333	1	1	1.04777	7.69528	1	2.33333	5.92614	27.6537	isopentenyltransferase 1	moderately similar to ( 252) AT1G68460 | Symbols: ATIPT1 | ATIPT1 (isopentenyltransferase 1); adenylate dimethylallyltransferase | chr1:25668976-25670049 REVERSEweakly similar to ( 175) loc_os05g47840 12005.m08856 protein ATIPT1, putative, expressed MiaA miaA IPPT no original description
Lus10012325	1292.33	583.333	129.048	20.8423	1562	491.333	100.056	164.245	histidine kinase 2	nearly identical (1273) AT5G35750 | Symbols: AHK2 | AHK2 (ARABIDOPSIS HISTIDINE KINASE 2); cytokinin receptor/ osmosensor/ protein histidine kinase | chr5:13911743-13916337 REVERSEweakly similar to ( 157) ETR1_MALDO Ethylene receptor (EC 2.7.13.3) - Malus domestica (Apple) (Malus sylvestris)nearly identical (1026) loc_os10g21810 12010.m65482 protein histidine kinase 3, putative, expressed PRK1110…
Lus10004428	2	163.333	8.0403	21.6247	2.33333	120.667	1.03726	31.5601	isopentenyltransferase 5	moderately similar to ( 320) AT5G19040 | Symbols: ATIPT5, IPT5 | IPT5; ATP binding / tRNA isopentenyltransferase/ transferase, transferring alkyl or aryl (other than methyl) groups | chr5:6362389-6363381 REVERSEmoderately similar to ( 246) loc_os03g59570 12003.m10854 protein cytokinin synthase, putative, expressed miaA MiaA no original description
Lus10018039	15.6667	47	15.0304	28.7285	12.3333	59.6667	24.5268	4.47046	cytokinin oxidase/dehydrogenase 1	moderately similar to ( 439) AT2G41510 | Symbols: ATCKX1, CKX1 | CKX1 (CYTOKININ OXIDASE/DEHYDROGENASE 1); cytokinin dehydrogenase | chr2:17314626-17316861 FORWARDmoderately similar to ( 243) CKX1_MAIZE Cytokinin dehydrogenase 1 precursor (EC 1.5.99.12) (Cytokinin oxidase 1) (CKO 1) (COX 1) (ZmCKX1) - Zea mays (Maize)moderately similar to ( 403) loc_os05g31040 12005.m07338 protein cytokinin dehyd…
Lus10034025	10	58.3333	2.44628	31.6442	5.66667	65	1.38646	23.6687	isopentenyltransferase 5	moderately similar to ( 325) AT5G19040 | Symbols: ATIPT5, IPT5 | IPT5; ATP binding / tRNA isopentenyltransferase/ transferase, transferring alkyl or aryl (other than methyl) groups | chr5:6362389-6363381 REVERSEmoderately similar to ( 244) loc_os03g59570 12003.m10854 protein cytokinin synthase, putative, expressed miaA MiaA no original description
Lus10006370	966.667	351.333	553.638	31.6442	964	322.333	247.323	120.6	histidine kinase 2	nearly identical (1258) AT5G35750 | Symbols: AHK2 | AHK2 (ARABIDOPSIS HISTIDINE KINASE 2); cytokinin receptor/ osmosensor/ protein histidine kinase | chr5:13911743-13916337 REVERSEweakly similar to ( 138) ETR1_MALDO Ethylene receptor (EC 2.7.13.3) - Malus domestica (Apple) (Malus sylvestris)nearly identical (1005) loc_os10g21810 12010.m65482 protein histidine kinase 3, putative, expressed CHASE P…
Lus10042035	3.66667	3.66667	51.2684	49.3527	3.33333	3.33333	79.4345	69.5286	cytokinin oxidase/dehydrogenase 1	moderately similar to ( 369) AT2G41510 | Symbols: ATCKX1, CKX1 | CKX1 (CYTOKININ OXIDASE/DEHYDROGENASE 1); cytokinin dehydrogenase | chr2:17314626-17316861 FORWARDmoderately similar to ( 211) CKX1_MAIZE Cytokinin dehydrogenase 1 precursor (EC 1.5.99.12) (Cytokinin oxidase 1) (CKO 1) (COX 1) (ZmCKX1) - Zea mays (Maize)moderately similar to ( 357) loc_os01g71310 12001.m13174 protein cytokinin dehyd…
Lus10028438	163	548.667	54.5504	65.5074	149.667	449.333	31.8135	185.802	histidine kinase 1	nearly identical (1448) AT2G17820 | Symbols: ATHK1, AHK1 | ATHK1 (histidine kinase 1); histidine phosphotransfer kinase/ osmosensor/ protein histidine kinase | chr2:7743133-7748013 REVERSEvery weakly similar to (91.3) ETR1_PRUPE Ethylene receptor (EC 2.7.13.3) - Prunus persica (Peach)weakly similar to ( 136) loc_os06g08450 12006.m05564 protein response regulator receiver domain containing protein…
Lus10026471	1445.33	171.333	1393.9	66.9532	1298.33	216.667	688.728	110.355	cytokinin oxidase 7	highly similar to ( 638) AT5G21482 | Symbols: CKX7, ATCKX5 | CKX7 (CYTOKININ OXIDASE 7); cytokinin dehydrogenase/ oxidoreductase | chr5:7226842-7230052 FORWARDmoderately similar to ( 336) CKX1_MAIZE Cytokinin dehydrogenase 1 precursor (EC 1.5.99.12) (Cytokinin oxidase 1) (CKO 1) (COX 1) (ZmCKX1) - Zea mays (Maize)highly similar to ( 530) loc_os08g35860 12008.m07575 protein cytokinin dehydrogenase…
Lus10006281	65.6667	146.667	72.632	69.3826	69.6667	152.667	66.6817	84.4941	tRNAisopentenyltransferase 2	moderately similar to ( 487) AT2G27760 | Symbols: ATIPT2, IPPT | ATIPT2 (TRNA ISOPENTENYLTRANSFERASE 2); adenylate dimethylallyltransferase/ tRNA isopentenyltransferase | chr2:11824860-11827432 FORWARDmoderately similar to ( 439) loc_os01g73760 12001.m13403 protein tRNA isopentenyltransferase, mitochondrial precursor, putative, expressed MiaA miaA IPPT no original description
Lus10027611	11.3333	1	2.44014	74.5336	4	1	2.76625	14.0855	cytokinin oxidase 3	moderately similar to ( 402) AT5G56970 | Symbols: CKX3, ATCKX3 | CKX3 (CYTOKININ OXIDASE 3); amine oxidase/ cytokinin dehydrogenase | chr5:23044944-23048245 REVERSEmoderately similar to ( 345) CKX1_MAIZE Cytokinin dehydrogenase 1 precursor (EC 1.5.99.12) (Cytokinin oxidase 1) (CKO 1) (COX 1) (ZmCKX1) - Zea mays (Maize)moderately similar to ( 379) loc_os02g12780 12002.m06525 protein cytokinin dehy…
Lus10003256	3.66667	6.66667	5.93683	101.842	6.33333	13.6667	4.13809	19.795	histidine-containing phosphotransfer factor 5	weakly similar to ( 101) AT1G03430 | Symbols: AHP5 | AHP5 (HISTIDINE-CONTAINING PHOSPHOTRANSFER FACTOR 5); histidine phosphotransfer kinase | chr1:848159-849235 FORWARDweakly similar to ( 121) HP1_ORYSA Histidine-containing phosphotransfer protein 1 (OsHP1) - Oryza sativa (Rice)weakly similar to ( 127) loc_os08g44350 12008.m08408 protein histidine-containing phosphotransfer protein 5, putative, e…
Lus10041891	111.333	2621.67	15.3818	115.245	106.333	2148	14.8513	947.625	histidine kinase 1	nearly identical (1436) AT2G17820 | Symbols: ATHK1, AHK1 | ATHK1 (histidine kinase 1); histidine phosphotransfer kinase/ osmosensor/ protein histidine kinase | chr2:7743133-7748013 REVERSEweakly similar to ( 103) ETR1_MALDO Ethylene receptor (EC 2.7.13.3) - Malus domestica (Apple) (Malus sylvestris)weakly similar to ( 134) loc_os06g08450 12006.m05564 protein response regulator receiver domain con…
Lus10012372	66	26.3333	24.4836	119.645	41.6667	25.6667	12.5037	111.27	isopentenyltransferase 3	moderately similar to ( 312) AT3G63110 | Symbols: ATIPT3, IPT3 | ATIPT3 (ARABIDOPSIS THALIANA ISOPENTENYLTRANSFERASE 3); ATP binding / tRNA isopentenyltransferase/ transferase, transferring alkyl or aryl (other than methyl) groups | chr3:23318437-23319447 REVERSEmoderately similar to ( 254) loc_os03g59570 12003.m10854 protein cytokinin synthase, putative, expressed MiaA miaA IPPT no original desc…
Lus10013250	159.333	493.333	172.057	160.472	167.667	556.333	112.615	446.272	CHASE domain containing histidine kinase protein	nearly identical (1219) AT2G01830 | Symbols: WOL, CRE1, WOL1, AHK4, ATCRE1 | WOL (WOODEN LEG); cytokinin receptor/ osmosensor/ phosphoprotein phosphatase/ protein histidine kinase | chr2:363332-367429 REVERSEweakly similar to ( 136) ETR1_BRAOL Ethylene receptor (EC 2.7.13.3) - Brassica oleracea (Wild cabbage)nearly identical (1022) loc_os03g50860 12003.m10071 protein histidine kinase, putative, e…
Lus10029849	1.66667	3004.33	5.24593	223.441	1.33333	2070.67	5.20644	249.159	Signal transduction histidine kinase	moderately similar to ( 412) AT2G47430 | Symbols: CKI1 | CKI1 (CYTOKININ-INDEPENDENT 1); protein histidine kinase/ two-component response regulator | chr2:19459167-19463122 REVERSEmoderately similar to ( 309) loc_os06g08450 12006.m05564 protein response regulator receiver domain containing protein BaeS PRK11107 PRK11091 REC REC Response_reg USP_Like PRK11466 CheY Usp KdpD PRK09959 PRK10841 no ori…
Lus10037032	1448.33	520.333	3294.92	229.663	1279.67	526.667	3054.8	701.821	histidine kinase 3	nearly identical (1033) AT1G27320 | Symbols: AHK3 | AHK3 (ARABIDOPSIS HISTIDINE KINASE 3); cytokinin receptor/ osmosensor/ protein histidine kinase | chr1:9487780-9492027 FORWARDweakly similar to ( 161) ETR1_PRUPE Ethylene receptor (EC 2.7.13.3) - Prunus persica (Peach)highly similar to ( 840) loc_os01g69920 12001.m42798 protein histidine kinase 2, putative, expressed PRK11107 PRK11091 CHASE PRK1…
Lus10030772	274.667	526	196.817	242.458	338.333	485.667	96.8307	675.606	CHASE domain containing histidine kinase protein	nearly identical (1218) AT2G01830 | Symbols: WOL, CRE1, WOL1, AHK4, ATCRE1 | WOL (WOODEN LEG); cytokinin receptor/ osmosensor/ phosphoprotein phosphatase/ protein histidine kinase | chr2:363332-367429 REVERSEweakly similar to ( 134) ETR1_BRAOL Ethylene receptor (EC 2.7.13.3) - Brassica oleracea (Wild cabbage)nearly identical (1028) loc_os03g50860 12003.m10071 protein histidine kinase, putative, e…
Lus10031985	612.667	733.333	318.688	332.953	580.667	743.333	294.759	428.092	histidinol dehydrogenase	highly similar to ( 744) AT5G63890 | Symbols: ATHDH | ATHDH (HISTIDINOL DEHYDROGENASE); histidinol dehydrogenase | chr5:25565600-25568104 REVERSEhighly similar to ( 743) HISX_ORYSA Histidinol dehydrogenase, chloroplast precursor (EC 1.1.1.23) (HDH) - Oryza sativa (Rice)highly similar to ( 743) loc_os01g13190 12001.m07929 protein histidinol dehydrogenase, chloroplast precursor, putative, expressed…
Lus10028015	51.6667	86.3333	49.2736	354.74	22.6667	35.3333	36.3117	350.641	isopentenyltransferase 3	moderately similar to ( 310) AT3G63110 | Symbols: ATIPT3, IPT3 | ATIPT3 (ARABIDOPSIS THALIANA ISOPENTENYLTRANSFERASE 3); ATP binding / tRNA isopentenyltransferase/ transferase, transferring alkyl or aryl (other than methyl) groups | chr3:23318437-23319447 REVERSEmoderately similar to ( 256) loc_os07g11050 12007.m05560 protein ATIPT5, putative, expressed MiaA miaA IPPT no original description
Lus10024289	1079	267	69.1195	441.802	697.333	208	37.3097	401.24	cytokinin oxidase 5	highly similar to ( 716) AT1G75450 | Symbols: CKX5, ATCKX5, ATCKX6 | CKX5 (CYTOKININ OXIDASE 5); cytokinin dehydrogenase | chr1:28315248-28318064 REVERSEmoderately similar to ( 446) CKX1_MAIZE Cytokinin dehydrogenase 1 precursor (EC 1.5.99.12) (Cytokinin oxidase 1) (CKO 1) (COX 1) (ZmCKX1) - Zea mays (Maize)highly similar to ( 608) loc_os01g56810 12001.m11838 protein cytokinin dehydrogenase 5 pre…
Lus10028992	1.33333	86	3.14417	460.834	2.33333	56.6667	3.12028	283.224	CHASE domain containing histidine kinase protein	nearly identical (1273) AT2G01830 | Symbols: WOL, CRE1, WOL1, AHK4, ATCRE1 | WOL (WOODEN LEG); cytokinin receptor/ osmosensor/ phosphoprotein phosphatase/ protein histidine kinase | chr2:363332-367429 REVERSEweakly similar to ( 129) ETR1_PRUPE Ethylene receptor (EC 2.7.13.3) - Prunus persica (Peach)nearly identical (1055) loc_os03g50860 12003.m10071 protein histidine kinase, putative, expressed C…
Lus10016363	46	72.6667	83.3536	595.284	28.6667	66.6667	78.4027	447.159	cytokinin oxidase/dehydrogenase 6	moderately similar to ( 462) AT3G63440 | Symbols: ATCKX6, CKX6, ATCKX7 | CKX6 (CYTOKININ OXIDASE/DEHYDROGENASE 6); cytokinin dehydrogenase | chr3:23424291-23426265 FORWARDmoderately similar to ( 234) CKX1_MAIZE Cytokinin dehydrogenase 1 precursor (EC 1.5.99.12) (Cytokinin oxidase 1) (CKO 1) (COX 1) (ZmCKX1) - Zea mays (Maize)moderately similar to ( 438) loc_os05g31040 12005.m07338 protein cytokin…
Lus10005317	19	56.3333	163.275	905.961	19	34.3333	23.9746	661.481	cytokinin oxidase/dehydrogenase 6	moderately similar to ( 498) AT3G63440 | Symbols: ATCKX6, CKX6, ATCKX7 | CKX6 (CYTOKININ OXIDASE/DEHYDROGENASE 6); cytokinin dehydrogenase | chr3:23424291-23426265 FORWARDmoderately similar to ( 248) CKX1_MAIZE Cytokinin dehydrogenase 1 precursor (EC 1.5.99.12) (Cytokinin oxidase 1) (CKO 1) (COX 1) (ZmCKX1) - Zea mays (Maize)moderately similar to ( 482) loc_os05g31040 12005.m07338 protein cytokin…
Lus10015773	1380	757	3172.43	1285.29	1230.67	667	2999.16	1974.52	histidine kinase 3	nearly identical (1323) AT1G27320 | Symbols: AHK3 | AHK3 (ARABIDOPSIS HISTIDINE KINASE 3); cytokinin receptor/ osmosensor/ protein histidine kinase | chr1:9487780-9492027 FORWARDweakly similar to ( 131) ETR1_CUCSA Ethylene receptor (EC 2.7.13.3) (CS-ETR1) - Cucumis sativus (Cucumber)nearly identical (1112) loc_os01g69920 12001.m42798 protein histidine kinase 2, putative, expressed PRK11107 CHASE …
Lus10039574	431.667	121.667	455.652	2278.4	346.333	129.333	332.409	4563.63	cytokinin oxidase/dehydrogenase 6	highly similar to ( 522) AT3G63440 | Symbols: ATCKX6, CKX6, ATCKX7 | CKX6 (CYTOKININ OXIDASE/DEHYDROGENASE 6); cytokinin dehydrogenase | chr3:23424291-23426265 FORWARDmoderately similar to ( 246) CKX1_MAIZE Cytokinin dehydrogenase 1 precursor (EC 1.5.99.12) (Cytokinin oxidase 1) (CKO 1) (COX 1) (ZmCKX1) - Zea mays (Maize)moderately similar to ( 478) loc_os05g31040 12005.m07338 protein cytokinin d…

## Sheet: SA
	M−Fn−L	M−Fn−R	S−Fn−L	S−Fn−R	M−Ly−L	M−Ly−R	S−Ly−L	S−Ly−R	annotation	Mapman
Lus10017826	1.66667	1	9.76389	5.8693	1.33333	1.33333	7.62036	14.024	UDP-glucosyltransferase 74F2	very weakly similar to (94.7) AT2G43840 | Symbols: UGT74F1 | UDP-glucoronosyl/UDP-glucosyl transferase family protein | chr2:18157681-18159166 FORWARDvery weakly similar to (90.5) loc_os04g12980 12004.m06538 protein indole-3-acetate beta-glucosyltransferase, putative, expressed no original description
Lus10024271	217	1.33333	26.8654	7.20296	51.6667	1	54.729	2.42006	jasmonic acid carboxyl methyltransferase	moderately similar to ( 273) AT1G19640 | Symbols: JMT | JMT (JASMONIC ACID CARBOXYL METHYLTRANSFERASE); jasmonate O-methyltransferase | chr1:6789166-6791708 REVERSEweakly similar to ( 188) BAMT_ANTMA Benzoate carboxyl methyltransferase (EC 2.1.1.-) (S-adenosyl-L-methionine:benzoic acid carboxyl methyltransferase) - Antirrhinum majus (Garden snapdragon)moderately similar to ( 223) loc_os01g50610 1…
Lus10043177	1	26	1.04777	22.3031	1.66667	42	1.03726	5.50796	IAA carboxylmethyltransferase 1	highly similar to ( 525) AT5G55250 | Symbols: IAMT1 | IAMT1 (IAA CARBOXYLMETHYLTRANSFERASE 1); S-adenosylmethionine-dependent methyltransferase/ indole acetic acid carboxyl methyltransferase | chr5:22407589-22410291 REVERSEweakly similar to ( 190) BAMT_ANTMA Benzoate carboxyl methyltransferase (EC 2.1.1.-) (S-adenosyl-L-methionine:benzoic acid carboxyl methyltransferase) - Antirrhinum majus (Gard…
Lus10041380	75.6667	5.33333	4.88727	36.4188	73	16.3333	25.5217	32.9468	S-adenosyl-L-methionine-dependent methyltransferases superfamily protein	moderately similar to ( 276) AT4G36470 | Symbols: | S-adenosyl-L-methionine:carboxyl methyltransferase family protein | chr4:17215128-17216475 REVERSEmoderately similar to ( 250) BAMT_ANTMA Benzoate carboxyl methyltransferase (EC 2.1.1.-) (S-adenosyl-L-methionine:benzoic acid carboxyl methyltransferase) - Antirrhinum majus (Garden snapdragon)moderately similar to ( 280) loc_os01g50610 12001.m1506…
Lus10025993	242	2	43.195	46.6002	68.3333	1	81.7678	3.44731	jasmonic acid carboxyl methyltransferase	moderately similar to ( 286) AT1G19640 | Symbols: JMT | JMT (JASMONIC ACID CARBOXYL METHYLTRANSFERASE); jasmonate O-methyltransferase | chr1:6789166-6791708 REVERSEmoderately similar to ( 289) BAMT_ANTMA Benzoate carboxyl methyltransferase (EC 2.1.1.-) (S-adenosyl-L-methionine:benzoic acid carboxyl methyltransferase) - Antirrhinum majus (Garden snapdragon)moderately similar to ( 290) loc_os01g506…
Lus10036548	928.667	863.333	541.353	79.9712	781.333	882.333	331.639	595.823	S-adenosyl-L-methionine-dependent methyltransferases superfamily protein	moderately similar to ( 239) AT5G66430 | Symbols: | S-adenosyl-L-methionine:carboxyl methyltransferase family protein | chr5:26525410-26526799 REVERSEmoderately similar to ( 233) BAMT_ANTMA Benzoate carboxyl methyltransferase (EC 2.1.1.-) (S-adenosyl-L-methionine:benzoic acid carboxyl methyltransferase) - Antirrhinum majus (Garden snapdragon)moderately similar to ( 244) loc_os02g48770 12002.m0991…
Lus10021802	1	2	2.09469	117.675	1	1.33333	1.38646	24.1486	S-adenosyl-L-methionine-dependent methyltransferases superfamily protein	moderately similar to ( 204) AT1G68040 | Symbols: | S-adenosyl-L-methionine:carboxyl methyltransferase family protein | chr1:25502876-25505224 FORWARDweakly similar to ( 162) BAMT_ANTMA Benzoate carboxyl methyltransferase (EC 2.1.1.-) (S-adenosyl-L-methionine:benzoic acid carboxyl methyltransferase) - Antirrhinum majus (Garden snapdragon)weakly similar to ( 142) loc_os06g20920 12006.m06749 protei…
Lus10036550	4.66667	532	13.2546	137.238	5	816.333	4.84984	114.138	S-adenosyl-L-methionine-dependent methyltransferases superfamily protein	moderately similar to ( 246) AT3G11480 | Symbols: BSMT1, ATBSMT1 | BSMT1; S-adenosylmethionine-dependent methyltransferase | chr3:3614544-3617137 FORWARDmoderately similar to ( 245) BAMT_ANTMA Benzoate carboxyl methyltransferase (EC 2.1.1.-) (S-adenosyl-L-methionine:benzoic acid carboxyl methyltransferase) - Antirrhinum majus (Garden snapdragon)moderately similar to ( 256) loc_os02g48770 12002.m0…
Lus10028500	4.33333	4	1.74924	182.003	4	4.33333	4.48304	88.3746	S-adenosyl-L-methionine-dependent methyltransferases superfamily protein	weakly similar to ( 157) AT5G37990 | Symbols: | S-adenosylmethionine-dependent methyltransferase/ methyltransferase | chr5:15133867-15135448 REVERSEvery weakly similar to (89.0) BAMT_ANTMA Benzoate carboxyl methyltransferase (EC 2.1.1.-) (S-adenosyl-L-methionine:benzoic acid carboxyl methyltransferase) - Antirrhinum majus (Garden snapdragon)very weakly similar to (98.2) loc_os06g22440 12006.m0916…
Lus10009675	79.6667	2	1418.42	1148.82	74.6667	2	1615.08	620.036	S-adenosyl-L-methionine-dependent methyltransferases superfamily protein	very weakly similar to (84.7) AT1G68040 | Symbols: | S-adenosyl-L-methionine:carboxyl methyltransferase family protein | chr1:25502876-25505224 FORWARDMethyltransf_7 no original description

## Sheet: JA
	M−Fn−L	M−Fn−R	S−Fn−L	S−Fn−R	M−Ly−L	M−Ly−R	S−Ly−L	S−Ly−R	annotation	Mapman
Lus10001465	16.6667	54.3333	4.53825	1.12174	19.6667	50	3.45117	48.5386	lipoxygenase 1	nearly identical (1118) AT1G55020 | Symbols: LOX1 | LOX1; lipoxygenase | chr1:20525798-20530143 FORWARDnearly identical (1100) LOX1_SOLTU Lipoxygenase 1 (EC 1.13.11.12) - Solanum tuberosum (Potato)highly similar to ( 935) loc_os03g49380 12003.m35371 protein lipoxygenase 4, putative, expressedLipoxygenase PLAT_LH2 LH2 PLAT no original description
Lus10032087	408	18.3333	6.63301	1.12174	73	11.6667	13.1101	11.5487	lipoxygenase 2	highly similar to ( 861) AT3G45140 | Symbols: LOX2, ATLOX2 | LOX2 (LIPOXYGENASE 2); lipoxygenase | chr3:16525437-16529233 FORWARDhighly similar to ( 813) LOX23_HORVU Lipoxygenase 2.3, chloroplast precursor (EC 1.13.11.12) (LOX2:Hv:3) - Hordeum vulgare (Barley)highly similar to ( 800) loc_os08g39850 12008.m26741 protein lipoxygenase 8, chloroplast precursor, putative, expressedLipoxygenase PLAT_LH…
Lus10031540	2083	2.33333	3.83864	1.12174	953	1	9.99764	3.22867	hydroperoxide lyase 1	moderately similar to ( 468) AT4G15440 | Symbols: HPL1, CYP74B2 | HPL1 (HYDROPEROXIDE LYASE 1); electron carrier/ heme binding / iron ion binding / monooxygenase | chr4:8835869-8838462 FORWARDmoderately similar to ( 312) C74A1_ORYSA Cytochrome P450 74A1, chloroplast precursor (EC 4.2.1.92) (Allene oxide synthase 1) (Hydroperoxide dehydrase 1) - Oryza sativa (Rice)moderately similar to ( 412) loc_…
Lus10021019	1.33333	1	5.92626	12.4159	1.33333	2.66667	12.7896	2.76111	allene oxide synthase	moderately similar to ( 443) AT5G42650 | Symbols: AOS, CYP74A, DDE2 | AOS (ALLENE OXIDE SYNTHASE); allene oxide synthase/ hydro-lyase/ oxygen binding | chr5:17097803-17099359 REVERSEmoderately similar to ( 409) C74A2_ORYSA Cytochrome P450 74A2 (EC 4.2.1.92) (Allene oxide synthase 2) (Hydroperoxide dehydrase 2) - Oryza sativa (Rice)moderately similar to ( 409) loc_os03g12500 12003.m06700 protein c…
Lus10030029	66.3333	12	1.39586	18.0629	12	6.66667	1.03726	3.10626	hydroperoxide lyase 1	moderately similar to ( 485) AT4G15440 | Symbols: HPL1, CYP74B2 | HPL1 (HYDROPEROXIDE LYASE 1); electron carrier/ heme binding / iron ion binding / monooxygenase | chr4:8835869-8838462 FORWARDmoderately similar to ( 315) C74A1_ORYSA Cytochrome P450 74A1, chloroplast precursor (EC 4.2.1.92) (Allene oxide synthase 1) (Hydroperoxide dehydrase 1) - Oryza sativa (Rice)moderately similar to ( 431) loc_…
Lus10031809	83.3333	108.667	123.549	19.4236	56	108.333	109.236	88.115	lipoxygenase 2	highly similar to ( 751) AT3G45140 | Symbols: LOX2, ATLOX2 | LOX2 (LIPOXYGENASE 2); lipoxygenase | chr3:16525437-16529233 FORWARDhighly similar to ( 691) LOX23_HORVU Lipoxygenase 2.3, chloroplast precursor (EC 1.13.11.12) (LOX2:Hv:3) - Hordeum vulgare (Barley)highly similar to ( 685) loc_os02g10120 12002.m06309 protein lipoxygenase 2.3, chloroplast precursor, putative, expressedLipoxygenase PLAT_…
Lus10001275	13	298	2.44278	27.4159	12.6667	263.667	1.72715	53.7349	12-oxophytodienoate reductase 1	highly similar to ( 547) AT1G76680 | Symbols: OPR1, ATOPR1 | OPR1; 12-oxophytodienoate reductase | chr1:28776982-28778271 FORWARDmoderately similar to ( 489) loc_os06g11240 12006.m05841 protein 12-oxophytodienoate reductase 2, putative, expressed OYE_like_FMN PRK10605 NemA Oxidored_FMN OYE_like_FMN_family OYE_YqiM_FMN OYE_like_5_FMN OYE_like_4_FMN OYE_like_3_FMN DCR_FMN PRK08255 OYE_like_2_FMN ER…
Lus10015138	340.667	1	2.09461	29.384	97.6667	1	8.28711	10.072	hydroperoxide lyase 1	moderately similar to ( 380) AT4G15440 | Symbols: HPL1, CYP74B2 | HPL1 (HYDROPEROXIDE LYASE 1); electron carrier/ heme binding / iron ion binding / monooxygenase | chr4:8835869-8838462 FORWARDmoderately similar to ( 291) C74A4_ORYSA Cytochrome P450 74A4 (EC 4.2.1.92) (Allene oxide synthase 4) (Hydroperoxide dehydrase 4) - Oryza sativa (Rice)moderately similar to ( 372) loc_os02g02000 12002.m05550…
Lus10035295	1	1	1.04777	30.7677	1	1	1.03726	1.04765	hydroperoxide lyase 1	moderately similar to ( 254) AT4G15440 | Symbols: HPL1, CYP74B2 | HPL1 (HYDROPEROXIDE LYASE 1); electron carrier/ heme binding / iron ion binding / monooxygenase | chr4:8835869-8838462 FORWARDweakly similar to ( 136) C74A1_ORYSA Cytochrome P450 74A1, chloroplast precursor (EC 4.2.1.92) (Allene oxide synthase 1) (Hydroperoxide dehydrase 1) - Oryza sativa (Rice)weakly similar to ( 180) loc_os02g020…
Lus10031236	547.667	56.3333	37.3516	49.5929	1207	54.3333	42.7807	18.2695	lipoxygenase 2	highly similar to ( 801) AT3G45140 | Symbols: LOX2, ATLOX2 | LOX2 (LIPOXYGENASE 2); lipoxygenase | chr3:16525437-16529233 FORWARDhighly similar to ( 745) LOX23_HORVU Lipoxygenase 2.3, chloroplast precursor (EC 1.13.11.12) (LOX2:Hv:3) - Hordeum vulgare (Barley)highly similar to ( 739) loc_os02g10120 12002.m06309 protein lipoxygenase 2.3, chloroplast precursor, putative, expressedLipoxygenase PLAT_…
Lus10030737	3.33333	5	4.19373	53.685	4.33333	4.33333	6.8927	23.4443	12-oxophytodienoate reductase 1	moderately similar to ( 256) AT1G76680 | Symbols: OPR1, ATOPR1 | OPR1; 12-oxophytodienoate reductase | chr1:28776982-28778271 FORWARDmoderately similar to ( 230) loc_os06g11280 12006.m05845 protein 12-oxophytodienoate reductase 2, putative, expressed OYE_like_FMN PRK10605 Oxidored_FMN NemA OYE_like_FMN_family OYE_like_5_FMN OYE_like_4_FMN OYE_YqiM_FMN OYE_like_3_FMN DCR_FMN no original description
Lus10006392	288.333	305	50.6966	79.704	281.667	315	72.5035	66.319	Galactose oxidase/kelch repeat superfamily protein	weakly similar to ( 115) AT3G07720 | Symbols: | kelch repeat-containing protein | chr3:2465439-2467033 FORWARDweakly similar to ( 108) loc_os09g07460 12009.m04015 protein tip elongation aberrant protein 1, putative, expressed no original description
Lus10031238	5.33333	31.6667	84.4774	80.0252	4	51.6667	43.1478	41.8523	lipoxygenase 2	moderately similar to ( 227) AT3G45140 | Symbols: LOX2, ATLOX2 | LOX2 (LIPOXYGENASE 2); lipoxygenase | chr3:16525437-16529233 FORWARDmoderately similar to ( 212) LOX23_HORVU Lipoxygenase 2.3, chloroplast precursor (EC 1.13.11.12) (LOX2:Hv:3) - Hordeum vulgare (Barley)moderately similar to ( 210) loc_os08g39850 12008.m26741 protein lipoxygenase 8, chloroplast precursor, putative, expressedLipoxyge…
Lus10038242	2.66667	4	1.74481	144.304	2	3.33333	2.42187	160.463	lipoxygenase 1	moderately similar to ( 263) AT1G55020 | Symbols: LOX1 | LOX1; lipoxygenase | chr1:20525798-20530143 FORWARDmoderately similar to ( 268) LOX1_SOLTU Lipoxygenase 1 (EC 1.13.11.12) - Solanum tuberosum (Potato)moderately similar to ( 335) loc_os05g23880 12005.m06682 protein lipoxygenase A, putative, expressedLipoxygenase no original description
Lus10008202	142.667	16	13.255	188.828	147.667	45.3333	27.3238	180.423	lipoxygenase 1	nearly identical (1041) AT1G55020 | Symbols: LOX1 | LOX1; lipoxygenase | chr1:20525798-20530143 FORWARDnearly identical (1006) LOX1_SOLTU Lipoxygenase 1 (EC 1.13.11.12) - Solanum tuberosum (Potato)highly similar to ( 860) loc_os03g49380 12003.m35371 protein lipoxygenase 4, putative, expressedLipoxygenase PLAT_LH2 no original description
Lus10013218	845.333	430.667	3629.86	332.117	662.667	503	3571.67	467.514	12-oxophytodienoate reductase 2	highly similar to ( 554) AT1G76690 | Symbols: OPR2, ATOPR2 | OPR2 | chr1:28778976-28780355 FORWARDhighly similar to ( 504) loc_os06g11290 12006.m05846 protein 12-oxophytodienoate reductase 2, putative, expressed OYE_like_FMN PRK10605 NemA Oxidored_FMN OYE_like_FMN_family OYE_YqiM_FMN OYE_like_5_FMN OYE_like_3_FMN OYE_like_4_FMN OYE_like_2_FMN DCR_FMN PRK08255 ER_like_FMN TMADH_HD_FMN no original …
Lus10031505	108	46.6667	3092.09	482.892	119	54.3333	1239.99	112.859	lipoxygenase 1	nearly identical (1207) AT1G55020 | Symbols: LOX1 | LOX1; lipoxygenase | chr1:20525798-20530143 FORWARDnearly identical (1182) LOX1_SOLTU Lipoxygenase 1 (EC 1.13.11.12) - Solanum tuberosum (Potato)nearly identical (1008) loc_os03g49380 12003.m35371 protein lipoxygenase 4, putative, expressedLipoxygenase PLAT_LH2 LH2 PLAT no original description
Lus10002545	6589	53.6667	170.004	482.967	2733	44.6667	194.503	237.994	lipoxygenase 2	highly similar to ( 970) AT3G45140 | Symbols: LOX2, ATLOX2 | LOX2 (LIPOXYGENASE 2); lipoxygenase | chr3:16525437-16529233 FORWARDhighly similar to ( 927) LOX23_HORVU Lipoxygenase 2.3, chloroplast precursor (EC 1.13.11.12) (LOX2:Hv:3) - Hordeum vulgare (Barley)highly similar to ( 926) loc_os02g10120 12002.m06309 protein lipoxygenase 2.3, chloroplast precursor, putative, expressedLipoxygenase PLAT_…
Lus10031810	7.66667	496.667	229.507	488.542	4.66667	828.667	204.634	250.672	lipoxygenase 2	highly similar to ( 920) AT3G45140 | Symbols: LOX2, ATLOX2 | LOX2 (LIPOXYGENASE 2); lipoxygenase | chr3:16525437-16529233 FORWARDhighly similar to ( 879) LOX23_HORVU Lipoxygenase 2.3, chloroplast precursor (EC 1.13.11.12) (LOX2:Hv:3) - Hordeum vulgare (Barley)highly similar to ( 876) loc_os08g39840 12008.m07964 protein lipoxygenase 7, chloroplast precursor, putative, expressedLipoxygenase PLAT_LH…
Lus10025857	5.66667	22.6667	12.2041	532.699	15.6667	15.3333	15.167	350.12	PLAT/LH2 domain-containing lipoxygenase family protein	highly similar to ( 782) AT3G22400 | Symbols: LOX5 | LOX5; electron carrier/ iron ion binding / lipoxygenase/ metal ion binding / oxidoreductase, acting on single donors with incorporation of molecular oxygen, incorporation of two atoms of oxygen | chr3:7927011-7931167 FORWARDhighly similar to ( 770) LOX1_SOLTU Lipoxygenase 1 (EC 1.13.11.12) - Solanum tuberosum (Potato)highly similar to ( 852) lo…
Lus10006429	34	512.333	15.3666	601.011	79	514	19.7134	784.381	PLAT/LH2 domain-containing lipoxygenase family protein	nearly identical (1006) AT1G67560 | Symbols: | lipoxygenase family protein | chr1:25319926-25324117 FORWARDhighly similar to ( 836) LOX6_ORYSA Probable lipoxygenase 6 (EC 1.13.11.12) - Oryza sativa (Rice)highly similar to ( 836) loc_os03g08220 12003.m06331 protein lipoxygenase 6, putative, expressedLipoxygenase PLAT_LH2 no original description
Lus10031239	27.6667	168.667	634.964	633.463	17.6667	276.333	219.6	215.716	lipoxygenase 3	weakly similar to ( 174) AT3G45140 | Symbols: LOX2, ATLOX2 | LOX2 (LIPOXYGENASE 2); lipoxygenase | chr3:16525437-16529233 FORWARDweakly similar to ( 189) LOXC1_ORYSA Lipoxygenase 7, chloroplast precursor (EC 1.13.11.12) - Oryza sativa (Rice)weakly similar to ( 189) loc_os08g39840 12008.m07964 protein lipoxygenase 7, chloroplast precursor, putative, expressedPLAT_LH2 Lipoxygenase no original descr…
Lus10031237	67.3333	298	795.672	726.323	32.6667	546	535.942	356.365	lipoxygenase 2	moderately similar to ( 433) AT3G45140 | Symbols: LOX2, ATLOX2 | LOX2 (LIPOXYGENASE 2); lipoxygenase | chr3:16525437-16529233 FORWARDmoderately similar to ( 409) LOXC1_ORYSA Lipoxygenase 7, chloroplast precursor (EC 1.13.11.12) - Oryza sativa (Rice)moderately similar to ( 409) loc_os08g39840 12008.m07964 protein lipoxygenase 7, chloroplast precursor, putative, expressedLipoxygenase no original de…
Lus10015666	776.333	631.333	381.72	758.17	707.333	687.667	329.353	3534.5	lipoxygenase 3	nearly identical (1324) AT1G17420 | Symbols: LOX3 | LOX3; electron carrier/ iron ion binding / lipoxygenase/ metal ion binding / oxidoreductase, acting on single donors with incorporation of molecular oxygen, incorporation of two atoms of oxygen | chr1:5977512-5981384 FORWARDnearly identical (1180) LOX6_ORYSA Probable lipoxygenase 6 (EC 1.13.11.12) - Oryza sativa (Rice)nearly identical (1180) loc…
Lus10030033	254	638.667	4291.1	976.357	317.667	706	4325.99	2656.98	hydroperoxide lyase 1	moderately similar to ( 440) AT4G15440 | Symbols: HPL1, CYP74B2 | HPL1 (HYDROPEROXIDE LYASE 1); electron carrier/ heme binding / iron ion binding / monooxygenase | chr4:8835869-8838462 FORWARDmoderately similar to ( 284) C74A4_ORYSA Cytochrome P450 74A4 (EC 4.2.1.92) (Allene oxide synthase 4) (Hydroperoxide dehydrase 4) - Oryza sativa (Rice)moderately similar to ( 390) loc_os02g02000 12002.m05550…
Lus10039094	1184.67	52	46756.3	995.693	1305.67	54.3333	22708.2	106.327	lipoxygenase 2	highly similar to ( 936) AT3G45140 | Symbols: LOX2, ATLOX2 | LOX2 (LIPOXYGENASE 2); lipoxygenase | chr3:16525437-16529233 FORWARDhighly similar to ( 897) LOX23_HORVU Lipoxygenase 2.3, chloroplast precursor (EC 1.13.11.12) (LOX2:Hv:3) - Hordeum vulgare (Barley)highly similar to ( 912) loc_os02g10120 12002.m06309 protein lipoxygenase 2.3, chloroplast precursor, putative, expressedLipoxygenase PLAT_…
Lus10032739	1884.33	3823.33	620.464	3064.71	1493	3893	775.722	2973.72	allene oxide synthase	moderately similar to ( 482) AT5G42650 | Symbols: AOS, CYP74A, DDE2 | AOS (ALLENE OXIDE SYNTHASE); allene oxide synthase/ hydro-lyase/ oxygen binding | chr5:17097803-17099359 REVERSEmoderately similar to ( 446) C74A1_ORYSA Cytochrome P450 74A1, chloroplast precursor (EC 4.2.1.92) (Allene oxide synthase 1) (Hydroperoxide dehydrase 1) - Oryza sativa (Rice)moderately similar to ( 446) loc_os03g55800…
Lus10018791	1708	1080.67	2933.4	3128.36	1203.67	1102.67	4180.28	3445.6	allene oxide synthase	highly similar to ( 599) AT5G42650 | Symbols: AOS, CYP74A, DDE2 | AOS (ALLENE OXIDE SYNTHASE); allene oxide synthase/ hydro-lyase/ oxygen binding | chr5:17097803-17099359 REVERSEhighly similar to ( 536) C74A1_ORYSA Cytochrome P450 74A1, chloroplast precursor (EC 4.2.1.92) (Allene oxide synthase 1) (Hydroperoxide dehydrase 1) - Oryza sativa (Rice)highly similar to ( 536) loc_os03g55800 12003.m1049…
Lus10031333	315	674.667	808.436	3576.87	414.667	680	770.934	3692.13	jasmonate-zim-domain protein 3	weakly similar to ( 111) AT3G17860 | Symbols: TIFY6B | JAZ3 (JASMONATE-ZIM-DOMAIN PROTEIN 3) | chr3:6121143-6122691 FORWARD no original description
Lus10027379	2551.33	4617.33	300.476	3626.8	2208	5266.33	183.745	4311.54	PLAT/LH2 domain-containing lipoxygenase family protein	highly similar to ( 838) AT3G45140 | Symbols: LOX2, ATLOX2 | LOX2 (LIPOXYGENASE 2); lipoxygenase | chr3:16525437-16529233 FORWARDhighly similar to ( 800) LOX23_HORVU Lipoxygenase 2.3, chloroplast precursor (EC 1.13.11.12) (LOX2:Hv:3) - Hordeum vulgare (Barley)highly similar to ( 813) loc_os02g10120 12002.m06309 protein lipoxygenase 2.3, chloroplast precursor, putative, expressedLipoxygenase PLAT_…
Lus10008113	561.667	731	416.554	3648.61	498.667	772.667	333.54	1500.11	lipoxygenase 3	nearly identical (1360) AT1G72520 | Symbols: | lipoxygenase, putative | chr1:27308611-27312589 FORWARDnearly identical (1189) LOX6_ORYSA Probable lipoxygenase 6 (EC 1.13.11.12) - Oryza sativa (Rice)nearly identical (1189) loc_os03g08220 12003.m06331 protein lipoxygenase 6, putative, expressedLipoxygenase PLAT_LH2 LH2 no original description
Lus10013151	627.667	1324.33	1341.02	3974.64	786.667	1512.33	1270	1802.47	lipoxygenase 3	nearly identical (1331) AT1G72520 | Symbols: | lipoxygenase, putative | chr1:27308611-27312589 FORWARDnearly identical (1169) LOX6_ORYSA Probable lipoxygenase 6 (EC 1.13.11.12) - Oryza sativa (Rice)nearly identical (1169) loc_os03g08220 12003.m06331 protein lipoxygenase 6, putative, expressedLipoxygenase PLAT_LH2 LH2 no original description
Lus10017991	1806.67	911.333	1576.73	4403.12	1680.33	959.667	1473.1	3304.32	jasmonate-zim-domain protein 3	weakly similar to ( 148) AT3G17860 | Symbols: TIFY6B | JAZ3 (JASMONATE-ZIM-DOMAIN PROTEIN 3) | chr3:6121143-6122691 FORWARD no original description
Lus10004915	346	203.667	562.93	6050.58	367	198.667	685.735	5755.23	PLAT/LH2 domain-containing lipoxygenase family protein	nearly identical (1266) AT3G22400 | Symbols: LOX5 | LOX5; electron carrier/ iron ion binding / lipoxygenase/ metal ion binding / oxidoreductase, acting on single donors with incorporation of molecular oxygen, incorporation of two atoms of oxygen | chr3:7927011-7931167 FORWARDnearly identical (1202) LOX1_SOLTU Lipoxygenase 1 (EC 1.13.11.12) - Solanum tuberosum (Potato)nearly identical (1097) loc_o…
Lus10017571	676.667	1250.67	189.6	6172.32	705	1436.67	381.324	6805.18	allene oxide cyclase 3	moderately similar to ( 219) AT3G25780 | Symbols: AOC3 | AOC3 (ALLENE OXIDE CYCLASE 3); allene-oxide cyclase | chr3:9409362-9410409 FORWARDmoderately similar to ( 221) loc_os03g32314 12003.m08473 protein allene oxide cyclase 4, chloroplast precursor, putative, expressedAllene_ox_cyc no original description
Lus10035289	99	900.667	6456.41	6501.82	348.667	1131	6633.63	4531.42	hydroperoxide lyase 1	moderately similar to ( 441) AT4G15440 | Symbols: HPL1, CYP74B2 | HPL1 (HYDROPEROXIDE LYASE 1); electron carrier/ heme binding / iron ion binding / monooxygenase | chr4:8835869-8838462 FORWARDmoderately similar to ( 303) C74A4_ORYSA Cytochrome P450 74A4 (EC 4.2.1.92) (Allene oxide synthase 4) (Hydroperoxide dehydrase 4) - Oryza sativa (Rice)moderately similar to ( 407) loc_os02g02000 12002.m05550…
Lus10015184	379.333	90.3333	6233.88	6803.84	302.667	94	3270.69	1093.3	lipoxygenase 1	nearly identical (1195) AT1G55020 | Symbols: LOX1 | LOX1; lipoxygenase | chr1:20525798-20530143 FORWARDnearly identical (1166) LOX1_SOLTU Lipoxygenase 1 (EC 1.13.11.12) - Solanum tuberosum (Potato)nearly identical (1003) loc_os03g49380 12003.m35371 protein lipoxygenase 4, putative, expressedLipoxygenase PLAT_LH2 LH2 PLAT no original description
Lus10028663	724.333	634.333	386.519	7178.3	442.667	640	490.534	8331.61	oxophytodienoate-reductase 3	highly similar to ( 566) AT2G06050 | Symbols: OPR3 | OPR3 (OPDA-REDUCTASE 3); 12-oxophytodienoate reductase | chr2:2359240-2361971 REVERSEhighly similar to ( 572) loc_os08g35740 12008.m080177 protein 12-oxophytodienoate reductase 3, putative, expressed OYE_like_FMN PRK10605 NemA Oxidored_FMN OYE_like_FMN_family OYE_like_5_FMN OYE_like_4_FMN OYE_YqiM_FMN OYE_like_3_FMN OYE_like_2_FMN DCR_FMN PRK08…
Lus10041986	1381	584.333	2067.96	11368.1	1197	667.667	2396.6	7386.29	jasmonate-zim-domain protein 3	weakly similar to ( 136) AT3G17860 | Symbols: TIFY6B | JAZ3 (JASMONATE-ZIM-DOMAIN PROTEIN 3) | chr3:6121143-6122691 FORWARD no original description
Lus10009473	267.333	740.333	70.9549	11543.1	174.333	869.667	106.619	11084.9	12-oxophytodienoate reductase 2	highly similar to ( 569) AT1G76680 | Symbols: OPR1, ATOPR1 | OPR1; 12-oxophytodienoate reductase | chr1:28776982-28778271 FORWARDhighly similar to ( 518) loc_os06g11210 12006.m05838 protein 12-oxophytodienoate reductase 2, putative, expressed OYE_like_FMN PRK10605 NemA Oxidored_FMN OYE_like_FMN_family OYE_YqiM_FMN OYE_like_5_FMN OYE_like_4_FMN OYE_like_3_FMN OYE_like_2_FMN PRK08255 DCR_FMN ER_lik…
Lus10033535	461	1352	178.424	12919.5	482	1643	345.24	7844.52	allene oxide cyclase 3	moderately similar to ( 238) AT3G25780 | Symbols: AOC3 | AOC3 (ALLENE OXIDE CYCLASE 3); allene-oxide cyclase | chr3:9409362-9410409 FORWARDmoderately similar to ( 236) loc_os03g32314 12003.m08473 protein allene oxide cyclase 4, chloroplast precursor, putative, expressedAllene_ox_cyc no original description
Lus10001274	208.333	392.667	90.1882	18727.9	350	437.333	113.72	19379.8	12-oxophytodienoate reductase 2	highly similar to ( 526) AT1G76680 | Symbols: OPR1, ATOPR1 | OPR1; 12-oxophytodienoate reductase | chr1:28776982-28778271 FORWARDmoderately similar to ( 476) loc_os06g11290 12006.m05846 protein 12-oxophytodienoate reductase 2, putative, expressed OYE_like_FMN PRK10605 NemA Oxidored_FMN OYE_like_FMN_family OYE_YqiM_FMN OYE_like_5_FMN OYE_like_4_FMN OYE_like_3_FMN OYE_like_2_FMN DCR_FMN PRK08255 TM…
Lus10001276	1243.33	293.667	1147.56	42678.2	323.333	336	1550.75	39702.9	12-oxophytodienoate reductase 1	highly similar to ( 584) AT1G76680 | Symbols: OPR1, ATOPR1 | OPR1; 12-oxophytodienoate reductase | chr1:28776982-28778271 FORWARDhighly similar to ( 513) loc_os02g35310 12002.m08619 protein 12-oxophytodienoate reductase 2, putative, expressed OYE_like_FMN PRK10605 NemA Oxidored_FMN OYE_like_FMN_family OYE_YqiM_FMN OYE_like_5_FMN OYE_like_4_FMN OYE_like_3_FMN OYE_like_2_FMN DCR_FMN PRK08255 ER_lik…
Lus10002547	8214.67	11295.3	1814.99	44210.2	8965.67	10725.7	1764.62	43513	lipoxygenase 2	highly similar to ( 943) AT3G45140 | Symbols: LOX2, ATLOX2 | LOX2 (LIPOXYGENASE 2); lipoxygenase | chr3:16525437-16529233 FORWARDhighly similar to ( 905) LOX23_HORVU Lipoxygenase 2.3, chloroplast precursor (EC 1.13.11.12) (LOX2:Hv:3) - Hordeum vulgare (Barley)highly similar to ( 915) loc_os02g10120 12002.m06309 protein lipoxygenase 2.3, chloroplast precursor, putative, expressedLipoxygenase PLAT_…

## Sheet: IAA
	M−Fn−L	M−Fn−R	S−Fn−L	S−Fn−R	M−Ly−L	M−Ly−R	S−Ly−L	S−Ly−R	annotation	Mapman
Lus10026994	180.667	24.3333	22.0641	1.12174	173	12.3333	10.4018	1.04765	Auxin efflux carrier family protein	moderately similar to ( 463) AT5G16530 | Symbols: PIN5 | PIN5 (PIN-FORMED 5); auxin:hydrogen symporter/ transporter | chr5:5400735-5402626 FORWARDmoderately similar to ( 372) PIN6_ORYSA Probable auxin efflux carrier component 6 (OsPIN6) - Oryza sativa (Rice)moderately similar to ( 372) loc_os01g69070 12001.m13008 protein auxin efflux carrier component 6, putative, expressedMem_trans no original d…
Lus10018006	50.3333	173	5.93582	1.12174	64	196	4.82968	65.2554	Auxin efflux carrier family protein	moderately similar to ( 352) AT1G73590 | Symbols: PIN1, ATPIN1 | PIN1 (PIN-FORMED 1); transporter | chr1:27659772-27662876 FORWARDmoderately similar to ( 341) PIN1C_ORYSA Probable auxin efflux carrier component 1c (OsPIN1c) - Oryza sativa (Rice)moderately similar to ( 341) loc_os06g12610 12006.m05977 protein auxin efflux carrier component 1c, putative, expressedMem_trans no original description
Lus10042003	26.6667	126	3.84043	1.12174	49	126.333	5.17776	41.363	Auxin efflux carrier family protein	weakly similar to ( 165) AT1G73590 | Symbols: PIN1, ATPIN1 | PIN1 (PIN-FORMED 1); transporter | chr1:27659772-27662876 FORWARDweakly similar to ( 176) PIN1C_ORYSA Probable auxin efflux carrier component 1c (OsPIN1c) - Oryza sativa (Rice)weakly similar to ( 176) loc_os06g12610 12006.m05977 protein auxin efflux carrier component 1c, putative, expressedMem_trans no original description
Lus10020193	164.667	92.3333	20.281	1.12174	187.333	91.3333	21.1663	2.76111	Auxin efflux carrier family protein	moderately similar to ( 477) AT5G16530 | Symbols: PIN5 | PIN5 (PIN-FORMED 5); auxin:hydrogen symporter/ transporter | chr5:5400735-5402626 FORWARDmoderately similar to ( 386) PIN6_ORYSA Probable auxin efflux carrier component 6 (OsPIN6) - Oryza sativa (Rice)moderately similar to ( 386) loc_os01g69070 12001.m13008 protein auxin efflux carrier component 6, putative, expressedMem_trans no original d…
Lus10001637	1	260.333	1.04777	1.12174	1.33333	174.667	1.03726	6.41859	Auxin efflux carrier family protein	highly similar to ( 741) AT5G57090 | Symbols: EIR1, WAV6, ATPIN2, PIN2, AGR, AGR1 | EIR1 (ETHYLENE INSENSITIVE ROOT 1); auxin efflux transmembrane transporter/ auxin:hydrogen symporter/ transporter | chr5:23100765-23104456 FORWARDhighly similar to ( 657) PIN2_ORYSA Probable auxin efflux carrier component 2 (OsPIN2) - Oryza sativa (Rice)highly similar to ( 657) loc_os06g44970 12006.m09024 protein …
Lus10036832	639	2.66667	13.3164	1.12174	497.667	1	10.0368	6.19417	O-fucosyltransferase family protein	highly similar to ( 588) AT5G15740 | Symbols: | unknown protein | chr5:5134788-5136956 REVERSEhighly similar to ( 602) loc_os09g29940 12009.m06145 protein auxin-independent growth promoter, putative, expressedDUF246 no original description
Lus10039797	942.667	6	33.5553	1.12174	1009.33	2.33333	106.854	16.832	Auxin-responsive GH3 family protein	highly similar to ( 773) AT4G03400 | Symbols: DFL2, GH3-10 | DFL2 (DWARF IN LIGHT 2) | chr4:1497675-1499729 REVERSEhighly similar to ( 546) GH35_ORYSA Probable indole-3-acetic acid-amido synthetase GH3.5 (EC 6.3.2.-) (Auxin-responsive GH3-like protein 5) (OsGH3-5) - Oryza sativa (Rice)highly similar to ( 546) loc_os05g50890 12005.m27991 protein indole-3-acetic acid-amido synthetase GH3.5, putativ…
Lus10009219	1	121.333	1.04777	1.12174	1	137.667	1.03726	1.04765	SAUR-like auxin-responsive protein family	no original description
Lus10016914	1	1.33333	1.04777	1.12174	1	1	1.03726	12.5981	SAUR-like auxin-responsive protein family	no original description
Lus10019195	535.333	2	6.30171	1.12174	457.667	1	11.736	1.73386	O-fucosyltransferase family protein	highly similar to ( 575) AT5G15740 | Symbols: | unknown protein | chr5:5134788-5136956 REVERSEhighly similar to ( 593) loc_os09g29940 12009.m06145 protein auxin-independent growth promoter, putative, expressedDUF246 no original description
Lus10018510	2.66667	50	1.04777	1.12174	1.66667	49.3333	1.03726	1.3887	Auxin-responsive GH3 family protein	highly similar to ( 831) AT5G54510 | Symbols: GH3.6, DFL1 | DFL1 (DWARF IN LIGHT 1); indole-3-acetic acid amido synthetase | chr5:22131321-22133564 REVERSEhighly similar to ( 752) GH31_ORYSA Probable indole-3-acetic acid-amido synthetase GH3.1 (EC 6.3.2.-) (Auxin-responsive GH3-like protein 1) (OsGH3-1) - Oryza sativa (Rice)highly similar to ( 752) loc_os01g57610 12001.m11911 protein indole-3-ace…
Lus10017018	4	2.33333	11.5218	1.12174	2	1	24.8589	16.1515	SAUR-like auxin-responsive protein family	weakly similar to ( 116) AT2G36210 | Symbols: | auxin-responsive family protein | chr2:15186326-15186733 REVERSE no original description
Lus10007563	1	23.6667	1.04777	1.12174	1	20	2.41705	1.04765	SAUR-like auxin-responsive protein family	very weakly similar to (85.5) AT4G34800 | Symbols: | auxin-responsive family protein | chr4:16596860-16597144 FORWARDvery weakly similar to (80.1) AX15A_SOYBN Auxin-induced protein 15A - Glycine max (Soybean)Auxin_inducible no original description
Lus10042374	31	14	17.8157	1.12174	34.6667	11	10.7151	1.04765	SAUR-like auxin-responsive protein family	very weakly similar to (98.2) AT1G19840 | Symbols: | auxin-responsive family protein | chr1:6872794-6873255 REVERSEAuxin_inducible no original description
Lus10001162	40	104	9.78682	1.12174	63.6667	160	6.9103	52.914	Auxin-responsive family protein	highly similar to ( 537) AT2G04850 | Symbols: | auxin-responsive protein-related | chr2:1704298-1705608 FORWARDmoderately similar to ( 429) loc_os03g09850 12003.m06440 protein dopamine beta-monooxygenase, putative, expressed B561 DUF568 no original description
Lus10025878	22.6667	24	3.49319	1.12174	47	35.6667	4.16364	11.6609	Auxin-responsive family protein	very weakly similar to (87.8) AT3G25290 | Symbols: | auxin-responsive family protein | chr3:9208955-9210353 FORWARD no original description
Lus10025911	37	1.33333	3.48962	1.12174	20.6667	1.66667	2.42556	1.04765	SAUR-like auxin-responsive protein family	weakly similar to ( 110) AT4G38840 | Symbols: | auxin-responsive protein, putative | chr4:18125174-18125473 REVERSEweakly similar to ( 106) ARG7_PHAAU Indole-3-acetic acid-induced protein ARG7 - Phaseolus aureus (Mung bean) (Vigna radiata)Auxin_inducible no original description
Lus10019196	340.667	1	9.44681	1.12174	324.667	1	6.90378	1.04765	O-fucosyltransferase family protein	highly similar to ( 539) AT5G15740 | Symbols: | unknown protein | chr5:5134788-5136956 REVERSEhighly similar to ( 534) loc_os09g29940 12009.m06145 protein auxin-independent growth promoter, putative, expressedDUF246 no original description
Lus10038191	13.3333	1	1.04777	1.12174	5.66667	1	1.03726	11.3386	SAUR-like auxin-responsive protein family	weakly similar to ( 109) AT4G38840 | Symbols: | auxin-responsive protein, putative | chr4:18125174-18125473 REVERSEweakly similar to ( 102) AX15A_SOYBN Auxin-induced protein 15A - Glycine max (Soybean)Auxin_inducible no original description
Lus10020439	41	19.6667	12.9188	1.12174	33.3333	23.3333	26.6172	7.53582	SAUR-like auxin-responsive protein family	no original description
Lus10001736	14.6667	45	8.0295	1.12174	23.6667	81	6.9299	11.6202	Auxin-responsive family protein	highly similar to ( 542) AT2G04850 | Symbols: | auxin-responsive protein-related | chr2:1704298-1705608 FORWARDmoderately similar to ( 433) loc_os03g09850 12003.m06440 protein dopamine beta-monooxygenase, putative, expressed B561 DUF568 no original description
Lus10023012	176.333	2	196.957	1.12174	142	2.66667	297.87	1.04765	SAUR-like auxin-responsive protein family	no original description
Lus10042378	1	24	1.04777	1.12174	1	19.6667	1.03726	1.04765	SAUR-like auxin-responsive protein family	weakly similar to ( 127) AT4G34810 | Symbols: | auxin-responsive family protein | chr4:16599104-16599421 FORWARDweakly similar to ( 103) AX10A_SOYBN Auxin-induced protein X10A - Glycine max (Soybean)very weakly similar to (80.1) loc_os02g24740 12002.m07621 protein OsSAUR9 - Auxin-responsive SAUR gene family member, expressedAuxin_inducible no original description
Lus10010713	30.6667	1	6.9881	1.12174	24.3333	1	10.0141	1.04765	SAUR-like auxin-responsive protein family	very weakly similar to (99.8) AT4G38840 | Symbols: | auxin-responsive protein, putative | chr4:18125174-18125473 REVERSEvery weakly similar to (97.4) AX15A_SOYBN Auxin-induced protein 15A - Glycine max (Soybean)Auxin_inducible no original description
Lus10008999	19	1	1.39586	1.12174	4	1.33333	1.03726	1.04765	SAUR-like auxin-responsive protein family	weakly similar to ( 109) AT4G38840 | Symbols: | auxin-responsive protein, putative | chr4:18125174-18125473 REVERSEweakly similar to ( 109) AX15A_SOYBN Auxin-induced protein 15A - Glycine max (Soybean)Auxin_inducible no original description
Lus10008992	28	1	1.04777	1.12174	16.6667	1	1.03726	1.04765	SAUR-like auxin-responsive protein family	weakly similar to ( 108) AT5G18050 | Symbols: | auxin-responsive protein, putative | chr5:5974691-5974963 REVERSEweakly similar to ( 102) ARG7_PHAAU Indole-3-acetic acid-induced protein ARG7 - Phaseolus aureus (Mung bean) (Vigna radiata)Auxin_inducible no original description
Lus10008996	18.6667	1	2.09997	1.12174	12	1	1.38646	7.2272	SAUR-like auxin-responsive protein family	weakly similar to ( 106) AT4G38840 | Symbols: | auxin-responsive protein, putative | chr4:18125174-18125473 REVERSEvery weakly similar to ( 100) ARG7_PHAAU Indole-3-acetic acid-induced protein ARG7 - Phaseolus aureus (Mung bean) (Vigna radiata)Auxin_inducible no original description
Lus10009001	23	1.33333	1.04777	1.12174	23.6667	1	1.73567	1.73386	SAUR-like auxin-responsive protein family	weakly similar to ( 118) AT4G38840 | Symbols: | auxin-responsive protein, putative | chr4:18125174-18125473 REVERSEweakly similar to ( 110) ARG7_PHAAU Indole-3-acetic acid-induced protein ARG7 - Phaseolus aureus (Mung bean) (Vigna radiata)Auxin_inducible no original description
Lus10007553	129.333	17.3333	2.09205	2.58253	88.3333	9.66667	7.24432	1.04765	SAUR-like auxin-responsive protein family	weakly similar to ( 167) AT4G34760 | Symbols: | auxin-responsive family protein | chr4:16582471-16582794 REVERSEvery weakly similar to (91.7) AX15A_SOYBN Auxin-induced protein 15A - Glycine max (Soybean)weakly similar to ( 108) loc_os02g24700 12002.m07617 protein OsSAUR8 - Auxin-responsive SAUR gene family member, expressedAuxin_inducible no original description
Lus10032603	40.3333	92	42.942	2.58253	50	109	31.7733	22.7031	O-fucosyltransferase family protein	highly similar to ( 848) AT1G04910 | Symbols: | unknown protein | chr1:1388101-1391074 REVERSEhighly similar to ( 730) loc_os11g29120 12011.m079998 protein growth regulator like protein, putative, expressedDUF246 no original description
Lus10027985	8.66667	29.6667	1.39586	3.75704	7.33333	25	1.38036	1.3887	endoplasmic reticulum auxin binding protein 1	moderately similar to ( 264) AT4G02980 | Symbols: ABP1, ABP | ABP1 (ENDOPLASMIC RETICULUM AUXIN BINDING PROTEIN 1); auxin binding | chr4:1319902-1321449 REVERSEmoderately similar to ( 283) ABP1_TOBAC Auxin-binding protein T85 precursor (ABP) - Nicotiana tabacum (Common tobacco)moderately similar to ( 236) loc_os12g34460 12012.m073846 protein auxin-binding protein 4 precursor, putative, expressedA…
Lus10010714	40.6667	3	6.29277	4.40851	37.3333	1.66667	13.8073	1.73386	SAUR-like auxin-responsive protein family	weakly similar to ( 110) AT4G38840 | Symbols: | auxin-responsive protein, putative | chr4:18125174-18125473 REVERSEweakly similar to ( 111) AX15A_SOYBN Auxin-induced protein 15A - Glycine max (Soybean)Auxin_inducible no original description
Lus10004014	63.3333	1.33333	4.88812	6.76881	59.6667	1	9.66024	1.04765	SAUR-like auxin-responsive protein family	very weakly similar to (95.9) AT3G09870 | Symbols: | auxin-responsive family protein | chr3:3027555-3027896 REVERSE no original description
Lus10012189	78	3	1.04777	7.20296	55	4.33333	1.03726	3.79246	SAUR-like auxin-responsive protein family	weakly similar to ( 168) AT4G34760 | Symbols: | auxin-responsive family protein | chr4:16582471-16582794 REVERSEvery weakly similar to (90.5) AX15A_SOYBN Auxin-induced protein 15A - Glycine max (Soybean)weakly similar to ( 106) loc_os02g24700 12002.m07617 protein OsSAUR8 - Auxin-responsive SAUR gene family member, expressedAuxin_inducible no original description
Lus10010110	124	29.3333	76.112	7.20296	93	23.3333	68.1007	16.4663	SAUR-like auxin-responsive protein family	weakly similar to ( 116) AT2G46690 | Symbols: | auxin-responsive family protein | chr2:19180904-19181269 FORWARDvery weakly similar to (85.5) loc_os10g36703 12010.m65409 protein OsSAUR56 - Auxin-responsive SAUR gene family member, expressedAuxin_inducible no original description
Lus10013819	19.3333	1.66667	4.88634	7.69528	26.6667	2.66667	4.14717	9.2858	SAUR-like auxin-responsive protein family	very weakly similar to (87.0) AT3G09870 | Symbols: | auxin-responsive family protein | chr3:3027555-3027896 REVERSE no original description
Lus10013181	43.6667	74	9.77415	7.69528	39.3333	67	15.8194	8.70188	SAUR-like auxin-responsive protein family	weakly similar to ( 104) AT1G72430 | Symbols: | auxin-responsive protein-related | chr1:27265150-27265509 REVERSE no original description
Lus10013422	8.33333	52.6667	8.74425	8.22959	13.6667	44.3333	7.94514	26.393	Auxin efflux carrier family protein	moderately similar to ( 364) AT5G15100 | Symbols: PIN8 | PIN8 (PIN-FORMED 8); auxin:hydrogen symporter/ transporter | chr5:4892159-4893937 REVERSEmoderately similar to ( 261) PIN6_ORYSA Probable auxin efflux carrier component 6 (OsPIN6) - Oryza sativa (Rice)moderately similar to ( 313) loc_os01g51780 12001.m11355 protein auxin efflux carrier component 1b, putative, expressedMem_trans no original …
Lus10018007	49	275.333	3.48962	9.4041	54.6667	264	9.31159	67.0385	Auxin efflux carrier family protein	moderately similar to ( 245) AT5G57090 | Symbols: EIR1, WAV6, ATPIN2, PIN2, AGR, AGR1 | EIR1 (ETHYLENE INSENSITIVE ROOT 1); auxin efflux transmembrane transporter/ auxin:hydrogen symporter/ transporter | chr5:23100765-23104456 FORWARDmoderately similar to ( 253) PIN1C_ORYSA Probable auxin efflux carrier component 1c (OsPIN1c) - Oryza sativa (Rice)moderately similar to ( 258) loc_os12g04000 12012.…
Lus10009737	59.3333	26.6667	20.9615	10.3306	69.3333	39.6667	18.6863	41.7142	peptidase M20/M25/M40 family protein	moderately similar to ( 444) AT1G51760 | Symbols: IAR3, JR3 | IAR3 (IAA-ALANINE RESISTANT 3); IAA-Ala conjugate hydrolase/ metallopeptidase | chr1:19199562-19201424 FORWARDmoderately similar to ( 422) loc_os01g37960 12001.m10082 protein IAA-amino acid hydrolase ILR1-like 4 precursor, putative, expressedAbgB Peptidase_M20 no original description
Lus10001429	1	227.333	1.04777	10.982	1	146.667	1.72956	14.0929	Auxin efflux carrier family protein	highly similar to ( 738) AT5G57090 | Symbols: EIR1, WAV6, ATPIN2, PIN2, AGR, AGR1 | EIR1 (ETHYLENE INSENSITIVE ROOT 1); auxin efflux transmembrane transporter/ auxin:hydrogen symporter/ transporter | chr5:23100765-23104456 FORWARDhighly similar to ( 654) PIN2_ORYSA Probable auxin efflux carrier component 2 (OsPIN2) - Oryza sativa (Rice)highly similar to ( 654) loc_os06g44970 12006.m09024 protein …
Lus10030437	49.3333	55.3333	39.098	10.982	54.3333	63	32.4841	16.6768	O-fucosyltransferase family protein	highly similar to ( 757) AT1G14020 | Symbols: | unknown protein | chr1:4802930-4805111 FORWARDhighly similar to ( 622) loc_os03g07310 12003.m34793 protein axi 1 protein, putative, expressedDUF246 no original description
Lus10001398	10.6667	2.33333	23.3794	12.4159	8	3	31.7955	23.4583	SAUR-like auxin-responsive protein family	no original description
Lus10004629	204.333	4.66667	2.09469	12.4159	144.333	3.33333	5.1772	11.3198	O-fucosyltransferase family protein	moderately similar to ( 463) AT5G15740 | Symbols: | unknown protein | chr5:5134788-5136956 REVERSEmoderately similar to ( 472) loc_os06g17390 12006.m06451 protein auxin-independent growth promoter, putative, expressedDUF246 no original description
Lus10002274	11.3333	30	3.49755	12.9041	21	37.6667	4.14661	4.46226	Auxin-responsive family protein	moderately similar to ( 406) AT5G47530 | Symbols: | auxin-responsive protein, putative | chr5:19281471-19282870 FORWARDmoderately similar to ( 347) loc_os03g09900 12003.m06444 protein membrane protein, putative, expressed DUF568 B561 no original description
Lus10023011	47	26	29.35	12.9041	45.3333	31.3333	30.0912	9.94162	SAUR-like auxin-responsive protein family	no original description
Lus10032237	55.6667	7.33333	11.1862	14.2688	20	7	12.4439	53.6457	SAUR-like auxin-responsive protein family	weakly similar to ( 137) AT4G12410 | Symbols: | auxin-responsive family protein | chr4:7342956-7343429 REVERSEAuxin_inducible no original description
Lus10007290	10.3333	53.6667	7.32912	15.2373	11.6667	53.3333	6.92251	49.4486	O-fucosyltransferase family protein	highly similar to ( 688) AT1G29200 | Symbols: | unknown protein | chr1:10208724-10210488 FORWARDhighly similar to ( 554) loc_os06g35410 12006.m08078 protein growth regulator, putative, expressedDUF246 no original description
Lus10025114	1	1	1.04777	18.0629	1	1	1.03726	5.04618	SAUR-like auxin-responsive protein family	very weakly similar to (94.7) AT1G29450 | Symbols: | auxin-responsive protein, putative | chr1:10305981-10306406 REVERSEvery weakly similar to (97.1) loc_os09g37400 12009.m06687 protein OsSAUR45 - Auxin-responsive SAUR gene family member, expressed no original description
Lus10018765	354.333	67	27.9208	18.3379	257	43.3333	44.973	5.04618	indoleacetic acid-induced protein 16	no original description
Lus10042004	116.667	527.667	8.73734	18.9853	143	624.667	12.4001	124.429	Auxin efflux carrier family protein	moderately similar to ( 472) AT1G73590 | Symbols: PIN1, ATPIN1 | PIN1 (PIN-FORMED 1); transporter | chr1:27659772-27662876 FORWARDmoderately similar to ( 434) PIN1_ORYSA Auxin efflux carrier component 1 (OsPIN1) (Ethylene insensitive root 1 homolog) - Oryza sativa (Rice)moderately similar to ( 434) loc_os02g50960 12002.m33866 protein auxin efflux carrier component 1, putative, expressedMem_trans …
Lus10002281	1.66667	4	20.5738	18.9853	2.66667	7	56.5592	12.7066	Auxin efflux carrier family protein	very weakly similar to (97.4) AT1G71090 | Symbols: | auxin efflux carrier family protein | chr1:26812551-26813924 FORWARDvery weakly similar to ( 100) loc_os08g09190 12008.m05054 protein auxin Efflux Carrier family protein, expressed no original description
Lus10021341	7.66667	2	26.5337	18.9853	4	3.33333	28.341	3.10626	SAUR-like auxin-responsive protein family	weakly similar to ( 117) AT2G36210 | Symbols: | auxin-responsive family protein | chr2:15186326-15186733 REVERSE no original description
Lus10038224	11.3333	49	7.68785	19.0164	16	46.6667	16.2646	10.072	auxin-responsive family protein	weakly similar to ( 153) AT3G07390 | Symbols: AIR12 | AIR12; extracellular matrix structural constituent | chr3:2365452-2366273 FORWARDweakly similar to ( 124) loc_os08g41290 12008.m08107 protein AIR12, putative, expressed DUF568 no original description
Lus10026977	13	48.3333	6.27855	19.5237	33	50.6667	5.18073	8.58562	SAUR-like auxin-responsive protein family	weakly similar to ( 156) AT2G24400 | Symbols: | auxin-responsive protein, putative / small auxin up RNA (SAUR_D) | chr2:10377993-10378529 REVERSEweakly similar to ( 125) loc_os04g51890 12004.m10084 protein OsSAUR20 - Auxin-responsive SAUR gene family member, expressedAuxin_inducible no original description
Lus10037144	171	83.6667	145.253	22.9853	155	94.6667	185.82	50.2524	O-fucosyltransferase family protein	highly similar to ( 752) AT1G14020 | Symbols: | unknown protein | chr1:4802930-4805111 FORWARDhighly similar to ( 594) loc_os01g07410 12001.m07367 protein axi 1 protein, putative, expressedDUF246 no original description
Lus10037443	558	73.3333	87.3231	23.0855	695.667	93.6667	154.855	33.9269	SAUR-like auxin-responsive protein family	very weakly similar to (99.0) AT1G72430 | Symbols: | auxin-responsive protein-related | chr1:27265150-27265509 REVERSE no original description
Lus10029985	70.6667	133	14.7068	23.7329	77	127	25.2781	50.3096	NADH:ubiquinone oxidoreductase intermediate-associated protein 30	moderately similar to ( 324) AT1G17350 | Symbols: | auxin-induced-related / indole-3-acetic acid induced-related | chr1:5942391-5944330 FORWARDmoderately similar to ( 326) loc_os01g52720 12001.m11445 protein NADH dehydrogenase 1 alpha subcomplex, assembly factor 1, putative, expressed CIA30 no original description
Lus10029615	1196.67	931.667	1180.1	25.0706	1017	892	639.885	577.681	NAD(P)-linked oxidoreductase superfamily protein	moderately similar to ( 396) AT1G60710 | Symbols: ATB2 | ATB2; oxidoreductase | chr1:22355073-22356627 REVERSEmoderately similar to ( 369) A115_TOBAC Auxin-induced protein PCNT115 - Nicotiana tabacum (Common tobacco)highly similar to ( 505) loc_os01g43090 12001.m10572 protein auxin-induced protein PCNT115, putative, expressed Tas Aldo_ket_red ARA1 COG4989 PRK10376 PRK09912 COG1453 PRK10625 dkgB n…
Lus10025879	21.6667	149.333	4.1893	26.0512	29.6667	204.667	8.97532	36.151	auxin-responsive family protein	weakly similar to ( 149) AT3G07390 | Symbols: AIR12 | AIR12; extracellular matrix structural constituent | chr3:2365452-2366273 FORWARDweakly similar to ( 121) loc_os08g41290 12008.m08107 protein AIR12, putative, expressed DUF568 no original description
Lus10016080	6.33333	258.333	1.39586	26.9236	4.33333	220.333	1.38036	23.6424	Cytochrome b561/ferric reductase transmembrane with DOMON related domain	moderately similar to ( 312) AT3G07570 | Symbols: | membrane protein, putative | chr3:2418205-2420206 REVERSEmoderately similar to ( 240) loc_os01g67030 12001.m12807 protein dopamine beta-monooxygenase, putative, expressed B561 no original description
Lus10026792	103.333	68	45.3943	30.7718	90	71.3333	51.4447	45.4657	O-fucosyltransferase family protein	highly similar to ( 664) AT1G52630 | Symbols: | unknown protein | chr1:19606470-19607848 REVERSEhighly similar to ( 580) loc_os08g42550 12008.m080223 protein AP2 domain containing protein, expressedDUF246 no original description
Lus10039020	67	10.6667	18.5082	32.1324	57.6667	14.3333	19.0144	21.3987	SAUR-like auxin-responsive protein family	weakly similar to ( 110) AT5G18020 | Symbols: | auxin-responsive protein, putative | chr5:5966305-5966580 REVERSEweakly similar to ( 110) ARG7_PHAAU Indole-3-acetic acid-induced protein ARG7 - Phaseolus aureus (Mung bean) (Vigna radiata)Auxin_inducible no original description
Lus10013503	347.667	689	206.415	34.4968	316.333	667.667	174.912	240.813	O-fucosyltransferase family protein	highly similar to ( 739) AT5G15740 | Symbols: | unknown protein | chr5:5134788-5136956 REVERSEhighly similar to ( 763) loc_os06g17390 12006.m06451 protein auxin-independent growth promoter, putative, expressedDUF246 no original description
Lus10023948	61	54.3333	4.88556	35.4232	42	42.6667	2.07877	26.9431	O-fucosyltransferase family protein	highly similar to ( 665) AT4G38390 | Symbols: | unknown protein | chr4:17976042-17978380 FORWARDhighly similar to ( 642) loc_os04g47520 12004.m35417 protein auxin-independent growth promoter, putative, expressedDUF246 no original description
Lus10009685	56	201.667	5.94833	36.3497	85.3333	205.667	5.16796	179.83	Auxin efflux carrier family protein	highly similar to ( 517) AT1G73590 | Symbols: PIN1, ATPIN1 | PIN1 (PIN-FORMED 1); transporter | chr1:27659772-27662876 FORWARDmoderately similar to ( 494) PIN1C_ORYSA Probable auxin efflux carrier component 1c (OsPIN1c) - Oryza sativa (Rice)moderately similar to ( 494) loc_os06g12610 12006.m05977 protein auxin efflux carrier component 1c, putative, expressedMem_trans no original description
Lus10032173	10	10.3333	2.44363	36.8991	13	9.33333	5.89746	13.9401	SAUR-like auxin-responsive protein family	weakly similar to ( 115) AT4G38840 | Symbols: | auxin-responsive protein, putative | chr4:18125174-18125473 REVERSEweakly similar to ( 114) ARG7_PHAAU Indole-3-acetic acid-induced protein ARG7 - Phaseolus aureus (Mung bean) (Vigna radiata)Auxin_inducible no original description
Lus10026521	2.66667	5.33333	9.76117	39.1041	3.33333	3.66667	6.57033	15.5595	SAUR-like auxin-responsive protein family	weakly similar to ( 133) AT2G37030 | Symbols: | auxin-responsive family protein | chr2:15553732-15554106 FORWARDvery weakly similar to (95.5) loc_os04g43740 12004.m09333 protein OsSAUR18 - Auxin-responsive SAUR gene family member, expressedAuxin_inducible no original description
Lus10014444	64.6667	101.333	8.72684	42.3368	57.3333	129	3.81259	34.1927	O-fucosyltransferase family protein	highly similar to ( 619) AT4G38390 | Symbols: | unknown protein | chr4:17976042-17978380 FORWARDhighly similar to ( 600) loc_os04g47520 12004.m35417 protein auxin-independent growth promoter, putative, expressedDUF246 no original description
Lus10007975	325	447.333	427.937	44.7281	335	415.667	368.539	291.084	O-fucosyltransferase family protein	highly similar to ( 746) AT5G15740 | Symbols: | unknown protein | chr5:5134788-5136956 REVERSEhighly similar to ( 759) loc_os06g17390 12006.m06451 protein auxin-independent growth promoter, putative, expressedDUF246 no original description
Lus10009054	93.3333	495	4.19194	48.1512	95	443	9.99539	192.334	Auxin efflux carrier family protein	highly similar to ( 788) AT1G73590 | Symbols: PIN1, ATPIN1 | PIN1 (PIN-FORMED 1); transporter | chr1:27659772-27662876 FORWARDhighly similar to ( 798) PIN1C_ORYSA Probable auxin efflux carrier component 1c (OsPIN1c) - Oryza sativa (Rice)highly similar to ( 798) loc_os06g12610 12006.m05977 protein auxin efflux carrier component 1c, putative, expressedMem_trans no original description
Lus10026624	85.3333	155.333	48.5799	48.353	75	168	38.0616	99.9618	O-fucosyltransferase family protein	highly similar to ( 763) AT1G14020 | Symbols: | unknown protein | chr1:4802930-4805111 FORWARDhighly similar to ( 622) loc_os03g07310 12003.m34793 protein axi 1 protein, putative, expressedDUF246 no original description
Lus10009686	61	173.667	3.14238	55.1398	55.6667	186	2.40966	131.322	Auxin efflux carrier family protein	moderately similar to ( 280) AT2G01420 | Symbols: PIN4 | PIN4 (PIN-FORMED 4); auxin:hydrogen symporter/ transporter | chr2:180478-183199 REVERSEmoderately similar to ( 291) PIN1C_ORYSA Probable auxin efflux carrier component 1c (OsPIN1c) - Oryza sativa (Rice)moderately similar to ( 295) loc_os12g04000 12012.m26703 protein auxin efflux carrier component 1b, putative, expressedMem_trans no original…
Lus10022761	159	240.667	130.328	55.1438	132	261	121.344	166.244	Peptidase M20/M25/M40 family protein	moderately similar to ( 446) AT3G02875 | Symbols: ILR1 | ILR1 (IAA-LEUCINE RESISTANT 1); IAA-Leu conjugate hydrolase/ IAA-Phe conjugate hydrolase/ metallopeptidase | chr3:631993-633859 FORWARDmoderately similar to ( 454) loc_os07g14590 12007.m05904 protein IAA-amino acid hydrolase ILR1 precursor, putative, expressedAbgB Peptidase_M20 no original description
Lus10035323	57.3333	76	33.8689	56.6968	66.6667	79.3333	19.6901	35.3264	NADH:ubiquinone oxidoreductase intermediate-associated protein 30	moderately similar to ( 229) AT1G17350 | Symbols: | auxin-induced-related / indole-3-acetic acid induced-related | chr1:5942391-5944330 FORWARDmoderately similar to ( 229) loc_os01g52720 12001.m11445 protein NADH dehydrogenase 1 alpha subcomplex, assembly factor 1, putative, expressed CIA30 no original description
Lus10027753	3.33333	3.66667	50.8567	58.6458	2	3.66667	41.7314	13.3603	O-fucosyltransferase family protein	highly similar to ( 732) AT2G37980 | Symbols: | unknown protein | chr2:15894162-15897452 REVERSEhighly similar to ( 589) loc_os05g37880 12005.m07967 protein axi 1 like protein, putative, expressedDUF246 no original description
Lus10028957	199.667	245.333	43.307	59.3721	223.667	279	39.7623	153.15	O-fucosyltransferase family protein	highly similar to ( 754) AT4G16650 | Symbols: | unknown protein | chr4:9372727-9375910 FORWARDhighly similar to ( 655) loc_os04g46570 12004.m35405 protein growth regulator like protein, putative, expressedDUF246 no original description
Lus10034883	3	808.333	1.04777	60.887	1.33333	517.667	1.72715	90.927	Aluminium induced protein with YGL and LRDR motifs	moderately similar to ( 366) AT4G27450 | Symbols: | unknown protein | chr4:13727665-13728683 REVERSEweakly similar to ( 104) TSJT1_TOBAC Stem-specific protein TSJT1 - Nicotiana tabacum (Common tobacco)moderately similar to ( 206) loc_os03g58170 12003.m34944 protein stem-specific protein TSJT1, putative, expressedWali7 no original description
Lus10042673	650.333	50	135.825	61.7865	610	69	147.262	59.042	endoplasmic reticulum auxin binding protein 1	moderately similar to ( 255) AT4G02980 | Symbols: ABP1, ABP | ABP1 (ENDOPLASMIC RETICULUM AUXIN BINDING PROTEIN 1); auxin binding | chr4:1319902-1321449 REVERSEmoderately similar to ( 273) ABP1_TOBAC Auxin-binding protein T85 precursor (ABP) - Nicotiana tabacum (Common tobacco)moderately similar to ( 239) loc_os12g34460 12012.m073846 protein auxin-binding protein 4 precursor, putative, expressedA…
Lus10003715	216.333	246.333	154.978	64.1697	180.667	197.333	131.776	100.569	O-fucosyltransferase family protein	highly similar to ( 821) AT2G01480 | Symbols: | unknown protein | chr2:216980-220341 FORWARDhighly similar to ( 625) loc_os05g38490 12005.m08028 protein growth regulator protein, putativeDUF246 no original description
Lus10017171	461.667	330.333	1193.35	65.0192	467.333	330	965.601	200.854	O-fucosyltransferase family protein	highly similar to ( 824) AT5G35570 | Symbols: | unknown protein | chr5:13750101-13753383 REVERSEhighly similar to ( 715) loc_os09g27080 12009.m22099 protein axi 1 like protein, putative, expressedDUF246 no original description
Lus10025631	23.3333	78	7.34862	65.3483	40.6667	90.3333	6.91343	38.526	O-fucosyltransferase family protein	highly similar to ( 607) AT1G38065 | Symbols: | unknown protein | chr1:14289906-14292060 REVERSEmoderately similar to ( 497) loc_os12g07540 12012.m04743 protein growth regulator protein, putative, expressedDUF246 no original description
Lus10002921	1	3.33333	1.04777	65.9517	1	1	1.03726	9.04471	0	no original description
Lus10041184	708.667	366.667	238.748	67.2743	727.333	359	211.147	187.256	NAD(P)-linked oxidoreductase superfamily protein	moderately similar to ( 353) AT1G60690 | Symbols: | aldo/keto reductase family protein | chr1:22349892-22351668 REVERSEmoderately similar to ( 329) A115_TOBAC Auxin-induced protein PCNT115 - Nicotiana tabacum (Common tobacco)moderately similar to ( 450) loc_os10g28320 12010.m22021 protein auxin-induced protein PCNT115, putative, expressed Tas Aldo_ket_red ARA1 COG4989 PRK10376 PRK09912 PRK10625 C…
Lus10039723	11.6667	185.333	1.04777	67.2854	19	207	1.03726	32.9543	Auxin-responsive GH3 family protein	highly similar to ( 816) AT5G54510 | Symbols: GH3.6, DFL1 | DFL1 (DWARF IN LIGHT 1); indole-3-acetic acid amido synthetase | chr5:22131321-22133564 REVERSEhighly similar to ( 742) GH34_ORYSA Probable indole-3-acetic acid-amido synthetase GH3.4 (EC 6.3.2.-) (Auxin-responsive GH3-like protein 4) (OsGH3-4) - Oryza sativa (Rice)highly similar to ( 742) loc_os05g42150 12005.m08388 protein indole-3-ace…
Lus10021557	477	227	344.601	67.4064	438.333	197.333	273.439	91.837	O-fucosyltransferase family protein	highly similar to ( 808) AT5G35570 | Symbols: | unknown protein | chr5:13750101-13753383 REVERSEhighly similar to ( 706) loc_os09g27080 12009.m22099 protein axi 1 like protein, putative, expressedDUF246 no original description
Lus10024322	2.66667	12.6667	2.09819	70.553	4.33333	13.6667	1.7253	35.1254	SAUR-like auxin-responsive protein family	weakly similar to ( 149) AT1G75590 | Symbols: | auxin-responsive family protein | chr1:28383250-28383714 REVERSE no original description
Lus10013612	336	225.667	434.029	71.1545	442.333	229.667	437.169	138.754	O-fucosyltransferase family protein	highly similar to ( 839) AT3G03810 | Symbols: EDA30 | EDA30 (embryo sac development arrest 30) | chr3:972190-975901 REVERSEhighly similar to ( 706) loc_os05g04190 12005.m083565 protein auxin-independent growth promoter protein, putative, expressedDUF246 no original description
Lus10016917	1	1	1.04777	72.227	1	1	1.38036	21.4038	SAUR-like auxin-responsive protein family	no original description
Lus10013460	129.333	232.667	446.667	76.3633	92	221	419.31	115.335	O-fucosyltransferase family protein	highly similar to ( 837) AT2G01480 | Symbols: | unknown protein | chr2:216980-220341 FORWARDhighly similar to ( 612) loc_os05g38490 12005.m08028 protein growth regulator protein, putativeDUF246 no original description
Lus10025877	221.667	246	22.36	80.9247	304.667	287.667	37.9604	68.2787	Auxin-responsive family protein	moderately similar to ( 379) AT3G25290 | Symbols: | auxin-responsive family protein | chr3:9208955-9210353 FORWARDmoderately similar to ( 296) loc_os09g32470 12009.m06333 protein membrane protein, putative, expressed DUF568 B561 no original description
Lus10037328	288.333	1954.67	16.7801	81.8662	364	1980.33	18.7015	156.842	O-fucosyltransferase family protein	highly similar to ( 548) AT1G51630 | Symbols: | unknown protein | chr1:19142141-19144082 REVERSEmoderately similar to ( 418) loc_os09g32320 12009.m06320 protein expressed proteinDUF246 no original description
Lus10033161	4.66667	23.3333	2.09819	87.6074	3	24.6667	5.53548	74.6723	SAUR-like auxin-responsive protein family	weakly similar to ( 184) AT1G75590 | Symbols: | auxin-responsive family protein | chr1:28383250-28383714 REVERSEweakly similar to ( 107) loc_os04g56680 12004.m10555 protein OsSAUR22 - Auxin-responsive SAUR gene family member, expressedAuxin_inducible no original description
Lus10041185	194	844.667	97.9198	91.7035	174.667	773.667	100.302	211.097	NAD(P)-linked oxidoreductase superfamily protein	moderately similar to ( 383) AT1G60750 | Symbols: | oxidoreductase | chr1:22362293-22363854 REVERSEmoderately similar to ( 349) A115_TOBAC Auxin-induced protein PCNT115 - Nicotiana tabacum (Common tobacco)moderately similar to ( 469) loc_os10g28320 12010.m22021 protein auxin-induced protein PCNT115, putative, expressed Tas Aldo_ket_red ARA1 COG4989 PRK10376 COG1453 PRK10625 PRK09912 dkgB no origi…
Lus10016998	439	411.667	288.189	92.603	406.667	396.667	178.372	214.025	Peptidase M20/M25/M40 family protein	highly similar to ( 551) AT3G02875 | Symbols: ILR1 | ILR1 (IAA-LEUCINE RESISTANT 1); IAA-Leu conjugate hydrolase/ IAA-Phe conjugate hydrolase/ metallopeptidase | chr3:631993-633859 FORWARDmoderately similar to ( 471) loc_os07g14590 12007.m05904 protein IAA-amino acid hydrolase ILR1 precursor, putative, expressedAbgB Peptidase_M20 ArgE no original description
Lus10035540	5	10.6667	4.53739	93.2414	5.66667	7.33333	3.09955	12.3655	O-fucosyltransferase family protein	highly similar to ( 748) AT2G37980 | Symbols: | unknown protein | chr2:15894162-15897452 REVERSEhighly similar to ( 592) loc_os05g37880 12005.m07967 protein axi 1 like protein, putative, expressedDUF246 no original description
Lus10036785	287.667	276.667	283.244	93.7967	270.667	267.333	341.344	168.215	O-fucosyltransferase family protein	highly similar to ( 769) AT1G14020 | Symbols: | unknown protein | chr1:4802930-4805111 FORWARDhighly similar to ( 599) loc_os03g07310 12003.m34793 protein axi 1 protein, putative, expressedDUF246 no original description
Lus10032963	632.667	260	545.765	96.8702	552	228.333	488.404	151.977	IAA-leucine-resistant (ILR1)-like 3	highly similar to ( 539) AT5G54140 | Symbols: ILL3 | ILL3; IAA-amino acid conjugate hydrolase/ metallopeptidase | chr5:21965833-21967834 FORWARDhighly similar to ( 504) loc_os04g44110 12004.m09369 protein IAA-amino acid hydrolase ILR1-like 3 precursor, putative, expressedAbgB Peptidase_M20 PRK08651 no original description
Lus10001180	159	309.667	143.863	97.1796	172	331	146.832	83.3231	Cytochrome b561/ferric reductase transmembrane with DOMON related domain	moderately similar to ( 318) AT3G07570 | Symbols: | membrane protein, putative | chr3:2418205-2420206 REVERSEmoderately similar to ( 248) loc_os01g67030 12001.m12807 protein dopamine beta-monooxygenase, putative, expressed B561 no original description
Lus10035749	457.333	1845	48.9308	101.626	593.667	1839	53.1789	117.822	O-fucosyltransferase family protein	highly similar to ( 548) AT1G51630 | Symbols: | unknown protein | chr1:19142141-19144082 REVERSEmoderately similar to ( 419) loc_os09g32320 12009.m06320 protein expressed proteinDUF246 no original description
Lus10006227	224	254.333	258.144	102.73	230.667	244	279.37	218.358	O-fucosyltransferase family protein	highly similar to ( 805) AT3G26370 | Symbols: | unknown protein | chr3:9656886-9659741 FORWARDhighly similar to ( 734) loc_os02g06400 12002.m05988 protein auxin-independent growth promoter-like protein, putative, expressedDUF246 no original description
Lus10027317	50	19.6667	29.3278	108.401	47.3333	23.3333	75.2458	48.5807	SAUR-like auxin-responsive protein family	weakly similar to ( 111) AT4G38840 | Symbols: | auxin-responsive protein, putative | chr4:18125174-18125473 REVERSEweakly similar to ( 107) ARG7_PHAAU Indole-3-acetic acid-induced protein ARG7 - Phaseolus aureus (Mung bean) (Vigna radiata)Auxin_inducible no original description
Lus10004729	121	158.333	37.0388	118.764	140.667	189.667	45.9561	80.8577	O-fucosyltransferase family protein	highly similar to ( 740) AT4G16650 | Symbols: | unknown protein | chr4:9372727-9375910 FORWARDhighly similar to ( 656) loc_os04g46570 12004.m35405 protein growth regulator like protein, putative, expressedDUF246 no original description
Lus10036833	267	30	17.1326	119.68	246	32	15.5462	54.2965	O-fucosyltransferase family protein	highly similar to ( 536) AT3G02250 | Symbols: | unknown protein | chr3:424185-426376 REVERSEhighly similar to ( 537) loc_os09g29940 12009.m06145 protein auxin-independent growth promoter, putative, expressedDUF246 no original description
Lus10010654	333.667	383.667	664.838	141.772	409.667	360	607.673	229.22	O-fucosyltransferase family protein	highly similar to ( 833) AT3G03810 | Symbols: EDA30 | EDA30 (embryo sac development arrest 30) | chr3:972190-975901 REVERSEhighly similar to ( 692) loc_os05g04190 12005.m083565 protein auxin-independent growth promoter protein, putative, expressedDUF246 no original description
Lus10030295	13.6667	36	15.3597	155.457	16.6667	49.6667	18.3506	72.6192	SAUR-like auxin-responsive protein family	weakly similar to ( 117) AT2G45210 | Symbols: | auxin-responsive protein-related | chr2:18641884-18642372 FORWARDAuxin_inducible no original description
Lus10007481	212.667	379	59.3998	156.857	296.333	399.667	64.0959	231.304	O-fucosyltransferase family protein	highly similar to ( 749) AT4G16650 | Symbols: | unknown protein | chr4:9372727-9375910 FORWARDhighly similar to ( 657) loc_os04g46570 12004.m35405 protein growth regulator like protein, putative, expressedDUF246 no original description
Lus10021321	272.667	72.6667	342.056	157.298	187	78	246.964	85.0722	Peptidase M20/M25/M40 family protein	highly similar to ( 554) AT3G02875 | Symbols: ILR1 | ILR1 (IAA-LEUCINE RESISTANT 1); IAA-Leu conjugate hydrolase/ IAA-Phe conjugate hydrolase/ metallopeptidase | chr3:631993-633859 FORWARDmoderately similar to ( 474) loc_os03g62060 12003.m11084 protein IAA-amino acid hydrolase ILR1 precursor, putative, expressedAbgB Peptidase_M20 ArgE no original description
Lus10005781	341.667	136.667	536.516	165.158	307.667	104.333	829.267	173.072	SAUR-like auxin-responsive protein family	very weakly similar to (96.3) loc_os02g52990 12002.m10329 protein OsSAUR12 - Auxin-responsive SAUR gene family member, expressed no original description
Lus10015558	287.333	199.333	177.826	171.956	322	191.333	160.13	135.15	O-fucosyltransferase family protein	highly similar to ( 614) AT1G62330 | Symbols: | unknown protein | chr1:23046965-23050053 FORWARDmoderately similar to ( 487) loc_os06g13220 12006.m06037 protein growth regulator, putative, expressedDUF246 no original description
Lus10012732	994.333	486	1169.2	178.201	895.333	380.333	1331.82	259.124	O-fucosyltransferase family protein	highly similar to ( 767) AT5G65470 | Symbols: | unknown protein | chr5:26172432-26174904 FORWARDhighly similar to ( 695) loc_os09g24570 12009.m05611 protein psRT17-1 like protein, putative, expressedDUF246 no original description
Lus10020882	121.667	137.667	69.5494	178.945	124.333	121	61.2327	99.658	O-fucosyltransferase family protein	highly similar to ( 588) AT5G64600 | Symbols: | unknown protein | chr5:25825178-25827931 FORWARDhighly similar to ( 556) loc_os12g08820 12012.m26858 protein auxin-independent growth promoter-like protein, putative, expressedDUF246 no original description
Lus10016591	98.6667	164.667	40.1399	188.208	92.6667	130	35.2337	94.4138	tornado 1	highly similar to ( 957) AT5G55540 | Symbols: TRN1, LOP1 | TRN1 (TORNADO 1) | chr5:22496322-22500543 REVERSEmoderately similar to ( 434) loc_os03g53990 12003.m10365 protein expressed protein no original description
Lus10033418	5	2097.33	37.7197	192.348	5.66667	1689.33	48.7135	321.934	Aluminium induced protein with YGL and LRDR motifs	moderately similar to ( 370) AT4G27450 | Symbols: | unknown protein | chr4:13727665-13728683 REVERSEweakly similar to ( 112) TSJT1_TOBAC Stem-specific protein TSJT1 - Nicotiana tabacum (Common tobacco)moderately similar to ( 207) loc_os03g58170 12003.m34944 protein stem-specific protein TSJT1, putative, expressedWali7 Gn_AT_II no original description
Lus10010715	6.33333	13	8.02872	193.114	2.66667	11.6667	16.8953	271.205	peptidase M20/M25/M40 family protein	moderately similar to ( 453) AT1G51760 | Symbols: IAR3, JR3 | IAR3 (IAA-ALANINE RESISTANT 3); IAA-Ala conjugate hydrolase/ metallopeptidase | chr1:19199562-19201424 FORWARDmoderately similar to ( 459) loc_os01g37960 12001.m10082 protein IAA-amino acid hydrolase ILR1-like 4 precursor, putative, expressedAbgB Peptidase_M20 ArgE no original description
Lus10030685	291.333	307.667	476.684	219.974	262.667	317.667	550.71	180.655	Domain of unknown function (DUF298)	moderately similar to ( 247) AT3G28970 | Symbols: AAR3 | AAR3 (antiauxin-resistant 3) | chr3:10987970-10989782 REVERSEweakly similar to ( 174) loc_os07g43720 12007.m08597 protein expressed protein DUF298 no original description
Lus10020829	676	138.333	238.907	234.271	532.667	145.667	184.572	290.101	Auxin efflux carrier family protein	moderately similar to ( 462) AT2G01420 | Symbols: PIN4 | PIN4 (PIN-FORMED 4); auxin:hydrogen symporter/ transporter | chr2:180478-183199 REVERSEmoderately similar to ( 379) PIN1C_ORYSA Probable auxin efflux carrier component 1c (OsPIN1c) - Oryza sativa (Rice)moderately similar to ( 379) loc_os06g12610 12006.m05977 protein auxin efflux carrier component 1c, putative, expressedMem_trans no original…
Lus10025668	168.667	142	82.471	269.553	188	142.667	65.5278	496.39	IAA-leucine resistant (ILR)-like gene 6	highly similar to ( 556) AT1G44350 | Symbols: ILL6 | ILL6; IAA-amino acid conjugate hydrolase/ metallopeptidase | chr1:16834749-16838201 REVERSEhighly similar to ( 526) loc_os06g47620 12006.m09288 protein IAA-amino acid hydrolase ILR1-like 6 precursor, putative, expressedAbgB Peptidase_M20 no original description
Lus10018425	292.667	268.333	91.5234	295.749	305.667	229.667	63.6917	147.004	F-box/RNI-like superfamily protein	highly similar to ( 584) AT3G62980 | Symbols: TIR1 | TIR1 (TRANSPORT INHIBITOR RESPONSE 1); auxin binding / protein binding / ubiquitin-protein ligase | chr3:23273479-23276181 REVERSEhighly similar to ( 584) loc_os04g32460 12004.m35129 protein transport inhibitor response 1 protein, putative, expressed no original description
Lus10002653	906.333	727	553.183	316.698	841	535.333	648.545	171.003	O-fucosyltransferase family protein	highly similar to ( 766) AT5G65470 | Symbols: | unknown protein | chr5:26172432-26174904 FORWARDhighly similar to ( 701) loc_os09g24570 12009.m05611 protein psRT17-1 like protein, putative, expressedDUF246 no original description
Lus10007792	246	292	111.805	333.868	219.333	263.667	127.855	173.623	O-fucosyltransferase family protein	highly similar to ( 734) AT4G16650 | Symbols: | unknown protein | chr4:9372727-9375910 FORWARDhighly similar to ( 652) loc_os04g46570 12004.m35405 protein growth regulator like protein, putative, expressedDUF246 no original description
Lus10011751	1745.33	2367	1948	345.291	1588.33	2292.33	2106.78	757.298	potassium channel beta subunit 1	highly similar to ( 616) AT1G04690 | Symbols: KAB1, KV-BETA1 | KAB1 (POTASSIUM CHANNEL BETA SUBUNIT); oxidoreductase/ potassium channel | chr1:1313662-1315420 FORWARDhighly similar to ( 592) KCAB_ORYSA Probable voltage-gated potassium channel subunit beta (K(+) channel subunit beta) - Oryza sativa (Rice)highly similar to ( 592) loc_os02g57240 12002.m10746 protein voltage-gated potassium channel b…
Lus10011262	1188	873.333	662.318	358.473	1233.33	785.667	536.053	362.609	F-box/RNI-like superfamily protein	highly similar to ( 575) AT1G12820 | Symbols: AFB3 | AFB3 (AUXIN SIGNALING F-BOX 3); auxin binding / ubiquitin-protein ligase | chr1:4368879-4370780 REVERSEhighly similar to ( 577) loc_os04g32460 12004.m35129 protein transport inhibitor response 1 protein, putative, expressed no original description
Lus10004399	22.6667	48.6667	56.2211	364.486	22.6667	47.3333	93.0298	273.094	NAD(P)-linked oxidoreductase superfamily protein	very weakly similar to (88.6) AT1G60680 | Symbols: | aldo/keto reductase family protein | chr1:22347824-22349236 REVERSEvery weakly similar to (87.0) A115_TOBAC Auxin-induced protein PCNT115 - Nicotiana tabacum (Common tobacco)very weakly similar to (95.5) loc_os04g26870 12004.m07812 protein auxin-induced protein PCNT115, putative, expressed no original description
Lus10010566	1.66667	1	1.39851	379.516	1	1	4.50007	157.02	NAD(P)-linked oxidoreductase superfamily protein	weakly similar to ( 199) AT1G10810 | Symbols: | aldo/keto reductase family protein | chr1:3599369-3600757 FORWARDweakly similar to ( 193) A115_TOBAC Auxin-induced protein PCNT115 - Nicotiana tabacum (Common tobacco)weakly similar to ( 194) loc_os04g26870 12004.m07812 protein auxin-induced protein PCNT115, putative, expressed Tas Aldo_ket_red no original description
Lus10031754	87.6667	115.333	311.974	387.761	63	84.6667	264.909	334.447	SAUR-like auxin-responsive protein family	weakly similar to ( 146) AT3G12830 | Symbols: | auxin-responsive family protein | chr3:4079117-4079515 REVERSEAuxin_inducible no original description
Lus10041303	132.667	67.6667	842.394	399.729	138	60.3333	778.099	326.779	NAD(P)-linked oxidoreductase superfamily protein	moderately similar to ( 416) AT1G60690 | Symbols: | aldo/keto reductase family protein | chr1:22349892-22351668 REVERSEmoderately similar to ( 355) A115_TOBAC Auxin-induced protein PCNT115 - Nicotiana tabacum (Common tobacco)moderately similar to ( 405) loc_os04g26910 12004.m07816 protein auxin-induced protein PCNT115, putative, expressed Tas Aldo_ket_red ARA1 PRK10376 COG4989 PRK09912 no origina…
Lus10035160	1843.33	1533.67	995.967	433.638	1654.33	1439.33	886.93	767.19	auxin signaling F-box 2	highly similar to ( 885) AT3G26810 | Symbols: AFB2 | AFB2 (AUXIN SIGNALING F-BOX 2); auxin binding / ubiquitin-protein ligase | chr3:9868342-9870464 FORWARDhighly similar to ( 790) loc_os04g32460 12004.m35129 protein transport inhibitor response 1 protein, putative, expressed no original description
Lus10006864	1915	1004.67	2044.51	437.059	1469.67	992.667	1970.88	1060.68	peptidase M20/M25/M40 family protein	highly similar to ( 569) AT1G51760 | Symbols: IAR3, JR3 | IAR3 (IAA-ALANINE RESISTANT 3); IAA-Ala conjugate hydrolase/ metallopeptidase | chr1:19199562-19201424 FORWARDhighly similar to ( 520) loc_os01g37960 12001.m10082 protein IAA-amino acid hydrolase ILR1-like 4 precursor, putative, expressedAbgB Peptidase_M20 no original description
Lus10001985	24	35.6667	23.0723	464.566	22.6667	39	17.6274	315.802	SAUR-like auxin-responsive protein family	very weakly similar to (89.4) AT2G45210 | Symbols: | auxin-responsive protein-related | chr2:18641884-18642372 FORWARD no original description
Lus10012190	360	164.667	133.363	512.842	286	162	164.221	517.941	SAUR-like auxin-responsive protein family	weakly similar to ( 131) AT4G34750 | Symbols: | auxin-responsive protein, putative / small auxin up RNA (SAUR_E) | chr4:16577566-16578018 FORWARDvery weakly similar to (87.4) loc_os02g05060 12002.m05854 protein OsSAUR5 - Auxin-responsive SAUR gene family member, expressedAuxin_inducible no original description
Lus10023674	2554	2455.33	2867.53	527.091	2208.67	2380.67	2832.36	987.987	potassium channel beta subunit 1	highly similar to ( 615) AT1G04690 | Symbols: KAB1, KV-BETA1 | KAB1 (POTASSIUM CHANNEL BETA SUBUNIT); oxidoreductase/ potassium channel | chr1:1313662-1315420 FORWARDhighly similar to ( 593) KCAB_ORYSA Probable voltage-gated potassium channel subunit beta (K(+) channel subunit beta) - Oryza sativa (Rice)highly similar to ( 593) loc_os02g57240 12002.m10746 protein voltage-gated potassium channel b…
Lus10024600	82	103	449.991	528.411	56.6667	132.333	400.84	536.176	SAUR-like auxin-responsive protein family	weakly similar to ( 126) AT4G12410 | Symbols: | auxin-responsive family protein | chr4:7342956-7343429 REVERSEAuxin_inducible no original description
Lus10031991	2449.33	1560	1394.82	539.277	2010	1407.33	1204.43	1077.01	auxin signaling F-box 2	highly similar to ( 618) AT3G26810 | Symbols: AFB2 | AFB2 (AUXIN SIGNALING F-BOX 2); auxin binding / ubiquitin-protein ligase | chr3:9868342-9870464 FORWARDhighly similar to ( 565) loc_os04g32460 12004.m35129 protein transport inhibitor response 1 protein, putative, expressed no original description
Lus10006624	470	1743.67	1798.7	635.492	585.333	1675.33	2820.34	768.145	Aluminium induced protein with YGL and LRDR motifs	moderately similar to ( 368) AT5G43830 | Symbols: | unknown protein | chr5:17622593-17624239 REVERSEweakly similar to ( 136) TSJT1_TOBAC Stem-specific protein TSJT1 - Nicotiana tabacum (Common tobacco)moderately similar to ( 330) loc_os03g53270 12003.m35408 protein stem-specific protein TSJT1, putative, expressedWali7 no original description
Lus10029200	103.667	12	13.9487	678.956	25.6667	10.6667	41.7828	969.768	IAA-leucine resistant (ILR)-like 2	moderately similar to ( 460) AT1G51760 | Symbols: IAR3, JR3 | IAR3 (IAA-ALANINE RESISTANT 3); IAA-Ala conjugate hydrolase/ metallopeptidase | chr1:19199562-19201424 FORWARDmoderately similar to ( 476) loc_os01g37960 12001.m10082 protein IAA-amino acid hydrolase ILR1-like 4 precursor, putative, expressedAbgB Peptidase_M20 no original description
Lus10018169	147	29.6667	64.6199	685.827	121	47.3333	62.8848	982.267	IAA-leucine resistant (ILR)-like gene 6	moderately similar to ( 397) AT1G44350 | Symbols: ILL6 | ILL6; IAA-amino acid conjugate hydrolase/ metallopeptidase | chr1:16834749-16838201 REVERSEmoderately similar to ( 382) loc_os06g47620 12006.m09288 protein IAA-amino acid hydrolase ILR1-like 6 precursor, putative, expressedAbgB Peptidase_M20 no original description
Lus10003598	87	302.333	1.74395	708.692	125	282	5.1735	67.4505	Auxin-responsive GH3 family protein	highly similar to ( 975) AT5G54510 | Symbols: GH3.6, DFL1 | DFL1 (DWARF IN LIGHT 1); indole-3-acetic acid amido synthetase | chr5:22131321-22133564 REVERSEhighly similar to ( 840) GH31_ORYSA Probable indole-3-acetic acid-amido synthetase GH3.1 (EC 6.3.2.-) (Auxin-responsive GH3-like protein 1) (OsGH3-1) - Oryza sativa (Rice)highly similar to ( 840) loc_os01g57610 12001.m11911 protein indole-3-ace…
Lus10020086	783	540	1714.8	767.575	840	495.667	1546.22	779.539	F-box/RNI-like superfamily protein	highly similar to ( 645) AT1G12820 | Symbols: AFB3 | AFB3 (AUXIN SIGNALING F-BOX 3); auxin binding / ubiquitin-protein ligase | chr1:4368879-4370780 REVERSEhighly similar to ( 628) loc_os04g32460 12004.m35129 protein transport inhibitor response 1 protein, putative, expressed no original description
Lus10010505	10189	2523.33	10915.9	769.633	9109	2369	10242.6	1118.17	Aluminium induced protein with YGL and LRDR motifs	moderately similar to ( 377) AT5G19140 | Symbols: ATAILP1, AILP1 | AILP1 | chr5:6423398-6425785 FORWARDweakly similar to ( 125) TSJT1_TOBAC Stem-specific protein TSJT1 - Nicotiana tabacum (Common tobacco)moderately similar to ( 324) loc_os12g05050 12012.m04498 protein stem-specific protein TSJT1, putative, expressedWali7 Gn_AT_II no original description
Lus10018426	989.667	825.667	1364.56	833.793	1103.67	948	1319.49	445.557	F-box/RNI-like superfamily protein	highly similar to ( 619) AT1G12820 | Symbols: AFB3 | AFB3 (AUXIN SIGNALING F-BOX 3); auxin binding / ubiquitin-protein ligase | chr1:4368879-4370780 REVERSEhighly similar to ( 601) loc_os04g32460 12004.m35129 protein transport inhibitor response 1 protein, putative, expressed no original description
Lus10017190	63.6667	388.333	2396.88	846.484	113	451.333	2546.74	656.701	O-fucosyltransferase family protein	highly similar to ( 751) AT2G37980 | Symbols: | unknown protein | chr2:15894162-15897452 REVERSEhighly similar to ( 594) loc_os05g37880 12005.m07967 protein axi 1 like protein, putative, expressedDUF246 no original description
Lus10015115	415	503.667	636.288	887.668	403	476.667	699.853	1048.02	NAD(P)-binding Rossmann-fold superfamily protein	highly similar to ( 849) AT1G05180 | Symbols: AXR1 | AXR1 (AUXIN RESISTANT 1); small protein activating enzyme | chr1:1498524-1501469 REVERSEhighly similar to ( 752) loc_os03g60550 12003.m35481 protein NEDD8-activating enzyme E1 regulatory subunit, putative, expressed APPBP1_RUB E1-1_like Aos1_SUMO Ube1_repeat1 ThiF E1_enzyme_family ThiF_MoeB_HesA_family no original description
Lus10009286	998	430	3966.33	942.341	1263.33	555.333	8033.93	580.111	SAUR-like auxin-responsive protein family	weakly similar to ( 124) AT3G60690 | Symbols: | auxin-responsive family protein | chr3:22435262-22435774 FORWARDAuxin_inducible no original description
Lus10014804	54	52.6667	3.1416	950.461	59.6667	40	5.89875	298.236	Auxin-responsive GH3 family protein	highly similar to ( 966) AT5G54510 | Symbols: GH3.6, DFL1 | DFL1 (DWARF IN LIGHT 1); indole-3-acetic acid amido synthetase | chr5:22131321-22133564 REVERSEhighly similar to ( 828) GH31_ORYSA Probable indole-3-acetic acid-amido synthetase GH3.1 (EC 6.3.2.-) (Auxin-responsive GH3-like protein 1) (OsGH3-1) - Oryza sativa (Rice)highly similar to ( 828) loc_os01g57610 12001.m11911 protein indole-3-ace…
Lus10021717	432.667	361	505.502	1049.18	411.333	371.667	541.145	1337.69	O-fucosyltransferase family protein	highly similar to ( 754) AT5G15740 | Symbols: | unknown protein | chr5:5134788-5136956 REVERSEhighly similar to ( 793) loc_os06g17390 12006.m06451 protein auxin-independent growth promoter, putative, expressedDUF246 no original description
Lus10001545	241.667	384.333	355.379	1081.81	160	254.333	278.221	592.103	O-fucosyltransferase family protein	highly similar to ( 683) AT1G35510 | Symbols: | unknown protein | chr1:13071486-13074675 FORWARDhighly similar to ( 558) loc_os12g07540 12012.m04743 protein growth regulator protein, putative, expressedDUF246 no original description
Lus10013997	1725.33	3075.67	419.7	1111.58	1853.67	3024	821.933	2016.06	dormancy-associated protein-like 1	weakly similar to ( 109) AT1G28330 | Symbols: | DYL1 (DORMANCY-ASSOCIATED PROTEIN-LIKE 1) | chr1:9934134-9935216 REVERSEvery weakly similar to (84.3) 12KD_FRAAN Auxin-repressed 12.5 kDa protein - Fragaria ananassa (Strawberry)Auxin_repressed no original description
Lus10005090	1464.67	1561.67	3499.75	1279.81	1959.67	1397	1727.12	1298.61	auxin transport protein (BIG)	nearly identical (3238) AT3G02260 | Symbols: BIG, DOC1, TIR3, UMB1, ASA1, LPR1, CRM1 | BIG (BIG); binding / ubiquitin-protein ligase/ zinc ion binding | chr3:431152-448489 REVERSEnearly identical (2657) loc_os09g07300 12009.m60216 protein BIG, putative, expressed no original description
Lus10008845	230.667	123.667	338.552	1300.66	313	140	486.413	432.323	SAUR-like auxin-responsive protein family	very weakly similar to (89.7) AT4G00880 | Symbols: | auxin-responsive family protein | chr4:366692-367060 REVERSE no original description
Lus10005094	113.667	338.333	48.2262	1446.97	107	305.333	29.7547	1331.82	O-fucosyltransferase family protein	highly similar to ( 867) AT3G30300 | Symbols: | FUNCTIONS IN: molecular_function unknown; INVOLVED IN: biological_process unknown; LOCATED IN: endomembrane system; EXPRESSED IN: 22 plant structures; EXPRESSED DURING: 13 growth stages; CONTAINS InterPro DOMAIN/s: Protein of unknown function DUF246, plant (InterPro:IPR004348); BEST Arabidopsis thaliana protein match is: EDA30 (embryo sac developmen…
Lus10039382	524.667	1154.33	1777.78	1467.75	554.333	1103	1962.77	1886.22	Aluminium induced protein with YGL and LRDR motifs	moderately similar to ( 367) AT5G43830 | Symbols: | unknown protein | chr5:17622593-17624239 REVERSEweakly similar to ( 134) TSJT1_TOBAC Stem-specific protein TSJT1 - Nicotiana tabacum (Common tobacco)moderately similar to ( 327) loc_os03g53270 12003.m35408 protein stem-specific protein TSJT1, putative, expressedWali7 no original description
Lus10034038	11566.3	22855.3	9039.27	1527.52	9898	17909	8947.11	7696.91	Aluminium induced protein with YGL and LRDR motifs	moderately similar to ( 375) AT5G19140 | Symbols: ATAILP1, AILP1 | AILP1 | chr5:6423398-6425785 FORWARDweakly similar to ( 127) TSJT1_TOBAC Stem-specific protein TSJT1 - Nicotiana tabacum (Common tobacco)moderately similar to ( 324) loc_os11g05050 12011.m28725 protein stem-specific protein TSJT1, putative, expressedWali7 Gn_AT_II no original description
Lus10011332	7	559.333	2.09469	1865.26	8.33333	596.667	4.47935	1940.07	SAUR-like auxin-responsive protein family	very weakly similar to (97.4) AT5G50760 | Symbols: | auxin-responsive family protein | chr5:20644780-20645331 FORWARDvery weakly similar to (95.1) loc_os01g70050 12001.m13054 protein OsSAUR3 - Auxin-responsive SAUR gene family memberAuxin_inducible no original description
Lus10030828	215.333	99.6667	1730.07	2247.98	216	142.333	2601.15	1890.21	peptidase M20/M25/M40 family protein	moderately similar to ( 485) AT1G51760 | Symbols: IAR3, JR3 | IAR3 (IAA-ALANINE RESISTANT 3); IAA-Ala conjugate hydrolase/ metallopeptidase | chr1:19199562-19201424 FORWARDmoderately similar to ( 494) loc_os01g37960 12001.m10082 protein IAA-amino acid hydrolase ILR1-like 4 precursor, putative, expressedAbgB Peptidase_M20 ArgE no original description
Lus10034651	700.667	825.667	1049.13	2293.93	549	820	810.094	1418.36	O-fucosyltransferase family protein	highly similar to ( 750) AT5G15740 | Symbols: | unknown protein | chr5:5134788-5136956 REVERSEhighly similar to ( 786) loc_os06g17390 12006.m06451 protein auxin-independent growth promoter, putative, expressedDUF246 no original description
Lus10029633	203.333	246.333	246.6	2451.07	185.333	211.333	327.699	1624.83	endoplasmic reticulum auxin binding protein 1	moderately similar to ( 264) AT4G02980 | Symbols: ABP1, ABP | ABP1 (ENDOPLASMIC RETICULUM AUXIN BINDING PROTEIN 1); auxin binding | chr4:1319902-1321449 REVERSEmoderately similar to ( 287) ABP1_TOBAC Auxin-binding protein T85 precursor (ABP) - Nicotiana tabacum (Common tobacco)moderately similar to ( 244) loc_os12g34460 12012.m073846 protein auxin-binding protein 4 precursor, putative, expressedA…
Lus10021119	145	335.667	1415.94	2491.94	193.333	435.667	1538.52	1246.52	O-fucosyltransferase family protein	highly similar to ( 749) AT2G37980 | Symbols: | unknown protein | chr2:15894162-15897452 REVERSEhighly similar to ( 595) loc_os05g37880 12005.m07967 protein axi 1 like protein, putative, expressedDUF246 no original description
Lus10041181	94.6667	211.667	51.6594	2533.04	212.333	206.333	99.1372	1587.98	Aluminium induced protein with YGL and LRDR motifs	moderately similar to ( 361) AT5G43830 | Symbols: | unknown protein | chr5:17622593-17624239 REVERSEweakly similar to ( 129) TSJT1_TOBAC Stem-specific protein TSJT1 - Nicotiana tabacum (Common tobacco)moderately similar to ( 320) loc_os03g53270 12003.m35408 protein stem-specific protein TSJT1, putative, expressedWali7 no original description
Lus10003914	104	445.667	881.159	3165.67	173.667	499	644.608	1563.79	O-fucosyltransferase family protein	highly similar to ( 707) AT2G44500 | Symbols: | unknown protein | chr2:18374447-18376435 FORWARDmoderately similar to ( 248) loc_os04g47520 12004.m35417 protein auxin-independent growth promoter, putative, expressedDUF246 no original description
Lus10003039	459.667	579	454.74	4261.2	452	588.333	402.581	1943.42	Auxin-responsive GH3 family protein	highly similar to ( 766) AT2G46370 | Symbols: JAR1, FIN219 | JAR1 (JASMONATE RESISTANT 1); ATP binding / adenylyltransferase/ catalytic/ jasmonate-amino synthetase | chr2:19034579-19036369 FORWARDhighly similar to ( 808) GH35_ORYSA Probable indole-3-acetic acid-amido synthetase GH3.5 (EC 6.3.2.-) (Auxin-responsive GH3-like protein 5) (OsGH3-5) - Oryza sativa (Rice)highly similar to ( 808) loc_os0…
Lus10005151	592.333	1209.67	585.849	4734.28	633	1269	762.793	4569.9	Auxin-responsive GH3 family protein	highly similar to ( 766) AT2G46370 | Symbols: JAR1, FIN219 | JAR1 (JASMONATE RESISTANT 1); ATP binding / adenylyltransferase/ catalytic/ jasmonate-amino synthetase | chr2:19034579-19036369 FORWARDhighly similar to ( 814) GH35_ORYSA Probable indole-3-acetic acid-amido synthetase GH3.5 (EC 6.3.2.-) (Auxin-responsive GH3-like protein 5) (OsGH3-5) - Oryza sativa (Rice)highly similar to ( 814) loc_os0…
Lus10010391	23	139	1893.96	4929.13	17	205.333	2061.07	2065.17	Auxin-responsive GH3 family protein	highly similar to ( 869) AT2G14960 | Symbols: GH3.1 | GH3.1 | chr2:6451659-6453670 REVERSEhighly similar to ( 832) GH32_ORYSA Probable indole-3-acetic acid-amido synthetase GH3.2 (EC 6.3.2.-) (Auxin-responsive GH3-like protein 2) (OsGH3-2) - Oryza sativa (Rice)highly similar to ( 832) loc_os01g55940 12001.m11750 protein indole-3-acetic acid-amido synthetase GH3.2, putative, expressedGH3 no origin…
Lus10030659	188.333	103	2868.43	5040.49	209	164.333	3944.52	6449.18	peptidase M20/M25/M40 family protein	moderately similar to ( 484) AT1G51760 | Symbols: IAR3, JR3 | IAR3 (IAA-ALANINE RESISTANT 3); IAA-Ala conjugate hydrolase/ metallopeptidase | chr1:19199562-19201424 FORWARDmoderately similar to ( 495) loc_os01g37960 12001.m10082 protein IAA-amino acid hydrolase ILR1-like 4 precursor, putative, expressedAbgB Peptidase_M20 ArgE PRK08588 no original description
Lus10037475	197.333	233.667	1324.13	5199.01	328.333	247	981.414	2000.99	O-fucosyltransferase family protein	highly similar to ( 650) AT2G44500 | Symbols: | unknown protein | chr2:18374447-18376435 FORWARDmoderately similar to ( 226) loc_os06g11600 12006.m32016 protein auxin-independent growth promoter-like protein, putative, expressedDUF246 no original description
Lus10034356	177	379.667	52.0811	8032.42	184.667	371.667	33.9428	3387.45	O-fucosyltransferase family protein	highly similar to ( 875) AT3G30300 | Symbols: | FUNCTIONS IN: molecular_function unknown; INVOLVED IN: biological_process unknown; LOCATED IN: endomembrane system; EXPRESSED IN: 22 plant structures; EXPRESSED DURING: 13 growth stages; CONTAINS InterPro DOMAIN/s: Protein of unknown function DUF246, plant (InterPro:IPR004348); BEST Arabidopsis thaliana protein match is: EDA30 (embryo sac developmen…
Lus10014869	7.66667	21	1165.24	8466.66	13.6667	27	1116.38	1714.66	Auxin-responsive GH3 family protein	highly similar to ( 845) AT2G14960 | Symbols: GH3.1 | GH3.1 | chr2:6451659-6453670 REVERSEhighly similar to ( 803) GH32_ORYSA Probable indole-3-acetic acid-amido synthetase GH3.2 (EC 6.3.2.-) (Auxin-responsive GH3-like protein 2) (OsGH3-2) - Oryza sativa (Rice)highly similar to ( 803) loc_os01g55940 12001.m11750 protein indole-3-acetic acid-amido synthetase GH3.2, putative, expressedGH3 no origin…
Lus10023701	1281.67	1050.33	9028.82	9242.86	1318.67	1127.67	11662.5	7824.58	NAD(P)-linked oxidoreductase superfamily protein	highly similar to ( 510) AT1G60710 | Symbols: ATB2 | ATB2; oxidoreductase | chr1:22355073-22356627 REVERSEmoderately similar to ( 487) A115_TOBAC Auxin-induced protein PCNT115 - Nicotiana tabacum (Common tobacco)highly similar to ( 541) loc_os04g26910 12004.m07816 protein auxin-induced protein PCNT115, putative, expressed Tas Aldo_ket_red ARA1 PRK10376 COG4989 PRK10625 PRK09912 COG1453 no origina…
Lus10032949	398.333	1338.67	1617.74	9337.32	518	1575	1605.21	4165.77	SAUR-like auxin-responsive protein family	very weakly similar to (94.0) AT2G46690 | Symbols: | auxin-responsive family protein | chr2:19180904-19181269 FORWARD no original description
Lus10037437	580.333	784	216.292	10557	500.333	815.667	250.46	6704.35	NAD(P)-linked oxidoreductase superfamily protein	highly similar to ( 565) AT1G60690 | Symbols: | aldo/keto reductase family protein | chr1:22349892-22351668 REVERSEhighly similar to ( 507) A115_TOBAC Auxin-induced protein PCNT115 - Nicotiana tabacum (Common tobacco)highly similar to ( 555) loc_os04g26910 12004.m07816 protein auxin-induced protein PCNT115, putative, expressed Tas Aldo_ket_red ARA1 PRK10376 COG4989 PRK10625 COG1453 PRK09912 dkgB …
Lus10015418	696.667	2219	607.957	11637.8	1405.33	3010	1325.11	10952.2	dormancy-associated protein-like 1	weakly similar to ( 110) AT1G28330 | Symbols: | DYL1 (DORMANCY-ASSOCIATED PROTEIN-LIKE 1) | chr1:9934134-9935216 REVERSEvery weakly similar to (84.7) 12KD_FRAAN Auxin-repressed 12.5 kDa protein - Fragaria ananassa (Strawberry)Auxin_repressed no original description
Lus10015318	2934.67	378.333	2302.93	13295.3	7727.67	633.333	3117.58	5049.62	dormancy-associated protein-like 1	weakly similar to ( 107) AT1G28330 | Symbols: | DYL1 (DORMANCY-ASSOCIATED PROTEIN-LIKE 1) | chr1:9934134-9935216 REVERSEvery weakly similar to (97.4) 12KD_FRAAN Auxin-repressed 12.5 kDa protein - Fragaria ananassa (Strawberry)Auxin_repressed no original description
Lus10026600	31.6667	141.333	3013.91	15517.5	39	192.333	3662.85	15230.7	Auxin-responsive GH3 family protein	highly similar to ( 943) AT2G14960 | Symbols: GH3.1 | GH3.1 | chr2:6451659-6453670 REVERSEhighly similar to ( 878) GH38_ORYSA Probable indole-3-acetic acid-amido synthetase GH3.8 (EC 6.3.2.-) (Auxin-responsive GH3-like protein 8) (OsGH3-8) - Oryza sativa (Rice)highly similar to ( 878) loc_os07g40290 12007.m08271 protein indole-3-acetic acid-amido synthetase GH3.8, putative, expressedGH3 no origin…
Lus10041272	1699.33	1982.67	2044.75	20700.8	1643.67	2009	2172.93	14774.5	NAD(P)-linked oxidoreductase superfamily protein	highly similar to ( 565) AT1G60690 | Symbols: | aldo/keto reductase family protein | chr1:22349892-22351668 REVERSEhighly similar to ( 509) A115_TOBAC Auxin-induced protein PCNT115 - Nicotiana tabacum (Common tobacco)highly similar to ( 563) loc_os04g26910 12004.m07816 protein auxin-induced protein PCNT115, putative, expressed Tas Aldo_ket_red ARA1 COG4989 PRK10376 PRK10625 PRK09912 COG1453 dkgB …
Lus10012350	1815.33	3523.33	2042.74	21045.8	3165	3693.33	2595.21	12712.8	Auxin-responsive family protein	moderately similar to ( 376) AT5G35735 | Symbols: | auxin-responsive family protein | chr5:13900913-13902934 REVERSEmoderately similar to ( 347) loc_os03g09900 12003.m06444 protein membrane protein, putative, expressed DUF568 B561 no original description
Lus10013887	93	997.667	1560.74	26043.9	153	950	958.453	29510.5	Auxin-responsive GH3 family protein	highly similar to ( 940) AT2G14960 | Symbols: GH3.1 | GH3.1 | chr2:6451659-6453670 REVERSEhighly similar to ( 876) GH38_ORYSA Probable indole-3-acetic acid-amido synthetase GH3.8 (EC 6.3.2.-) (Auxin-responsive GH3-like protein 8) (OsGH3-8) - Oryza sativa (Rice)highly similar to ( 876) loc_os07g40290 12007.m08271 protein indole-3-acetic acid-amido synthetase GH3.8, putative, expressedGH3 no origin…
Lus10006398	1421.67	4420.67	1551.32	34475.2	1892.67	4517	1631.01	15567.8	Auxin-responsive family protein	moderately similar to ( 238) AT5G47530 | Symbols: | auxin-responsive protein, putative | chr5:19281471-19282870 FORWARDmoderately similar to ( 237) loc_os03g09900 12003.m06444 protein membrane protein, putative, expressed B561 no original description
Lus10006105	18.3333	7.33333	203.497	40030.9	31.3333	14	272.153	26241	NAD(P)-linked oxidoreductase superfamily protein	highly similar to ( 551) AT1G60690 | Symbols: | aldo/keto reductase family protein | chr1:22349892-22351668 REVERSEmoderately similar to ( 487) A115_TOBAC Auxin-induced protein PCNT115 - Nicotiana tabacum (Common tobacco)highly similar to ( 545) loc_os04g26910 12004.m07816 protein auxin-induced protein PCNT115, putative, expressed Tas Aldo_ket_red ARA1 COG4989 PRK10376 PRK10625 COG1453 PRK09912 d…
Lus10011191	1470.33	7657.33	8680.22	45785.1	1623	9172.33	7681.63	41254.2	Aluminium induced protein with YGL and LRDR motifs	moderately similar to ( 261) AT4G27450 | Symbols: | unknown protein | chr4:13727665-13728683 REVERSEvery weakly similar to (88.6) TSJT1_TOBAC Stem-specific protein TSJT1 - Nicotiana tabacum (Common tobacco)weakly similar to ( 184) loc_os03g53270 12003.m35408 protein stem-specific protein TSJT1, putative, expressedWali7 no original description
Lus10018484	2418.33	4700.67	11233.6	66477.8	3100	5930.67	9464.09	54436.9	Aluminium induced protein with YGL and LRDR motifs	moderately similar to ( 283) AT4G27450 | Symbols: | unknown protein | chr4:13727665-13728683 REVERSEvery weakly similar to (93.6) TSJT1_TOBAC Stem-specific protein TSJT1 - Nicotiana tabacum (Common tobacco)weakly similar to ( 196) loc_os03g53270 12003.m35408 protein stem-specific protein TSJT1, putative, expressedWali7 Gn_AT_II no original description

## Sheet: ETH
	M−Fn−L	M−Fn−R	S−Fn−L	S−Fn−R	M−Ly−L	M−Ly−R	S−Ly−L	S−Ly−R	annotation	Mapman
Lus10008822	47	3.66667	1.04777	1.12174	34.6667	2	3.10935	1.04765	2-oxoglutarate (2OG) and Fe(II)-dependent oxygenase superfamily protein	weakly similar to ( 130) AT5G54000 | Symbols: | oxidoreductase, 2OG-Fe(II) oxygenase family protein | chr5:21917776-21919064 REVERSEweakly similar to ( 108) loc_os06g08032 12006.m05526 protein flavonol synthase/flavanone 3-hydroxylase, putative, expressed no original description
Lus10008097	2.33333	312.333	16.4561	1.12174	3	251	7.66366	7.87687	2-oxoglutarate (2OG) and Fe(II)-dependent oxygenase superfamily protein	moderately similar to ( 209) AT1G52800 | Symbols: | oxidoreductase, 2OG-Fe(II) oxygenase family protein | chr1:19664044-19665362 FORWARDvery weakly similar to (85.5) FLS_MALDO Flavonol synthase/flavanone 3-hydroxylase (EC 1.14.11.23) (EC 1.14.11.9) (FLS) - Malus domestica (Apple) (Malus sylvestris)weakly similar to ( 142) loc_os08g32170 12008.m07211 protein oxidoreductase, putative, expressed Pcb…
Lus10026801	47	6	16.0752	1.12174	53	7	34.9199	12.6905	2-oxoglutarate (2OG) and Fe(II)-dependent oxygenase superfamily protein	very weakly similar to (92.4) AT5G12270 | Symbols: | oxidoreductase, 2OG-Fe(II) oxygenase family protein | chr5:3970131-3971301 REVERSE no original description
Lus10034032	1	60.6667	1.39851	1.12174	1	60	1.03726	3.09806	2-oxoglutarate (2OG) and Fe(II)-dependent oxygenase superfamily protein	moderately similar to ( 344) AT1G06620 | Symbols: | 2-oxoglutarate-dependent dioxygenase, putative | chr1:2025618-2027094 FORWARDmoderately similar to ( 317) DV4H_CATRO Desacetoxyvindoline 4-hydroxylase (EC 1.14.11.20) - Catharanthus roseus (Rosy periwinkle) (Madagascar periwinkle)moderately similar to ( 297) loc_os03g48430 12003.m09851 protein 1-aminocyclopropane-1-carboxylate oxidase, putative,…
Lus10025620	44.6667	1	9.42023	1.12174	42.6667	1	14.8293	1.04765	flavonol synthase 1	moderately similar to ( 400) AT5G08640 | Symbols: FLS | FLS (FLAVONOL SYNTHASE); flavonol synthase | chr5:2804009-2805175 FORWARDmoderately similar to ( 453) FLS_PETHY Flavonol synthase/flavanone 3-hydroxylase (EC 1.14.11.23) (EC 1.14.11.9) (FLS) - Petunia hybrida (Petunia)moderately similar to ( 372) loc_os02g52840 12002.m10314 protein flavonol synthase/flavanone 3-hydroxylase, putative, express…
Lus10006759	12.3333	1.33333	20.2515	1.12174	7.33333	1.66667	66.5082	8.90412	gibberellin 2-oxidase 8	moderately similar to ( 394) AT4G21200 | Symbols: ATGA2OX8, GA2OX8 | GA2OX8 (GIBBERELLIN 2-OXIDASE 8); gibberellin 2-beta-dioxygenase | chr4:11302751-11304032 FORWARDweakly similar to ( 149) ACCO_ACTCH 1-aminocyclopropane-1-carboxylate oxidase (EC 1.14.17.4) (ACC oxidase) (Ethylene-forming enzyme) (EFE) - Actinidia chinensis (Kiwi) (Yangtao)moderately similar to ( 320) loc_os07g01340 12007.m04614…
Lus10023850	16.3333	39.6667	13.6315	1.12174	26.6667	36.6667	8.29507	12.0002	2-oxoglutarate (2OG) and Fe(II)-dependent oxygenase superfamily protein	moderately similar to ( 221) AT3G19000 | Symbols: | oxidoreductase, 2OG-Fe(II) oxygenase family protein | chr3:6554004-6554987 REVERSEweakly similar to ( 120) GAOX2_ORYSA Gibberellin 20 oxidase 2 (EC 1.14.11.-) (Gibberellin C-20 oxidase 2) (GA 20-oxidase 2) (Os20ox2) (Semidwarf-1 protein) - Oryza sativa (Rice)moderately similar to ( 280) loc_os03g42130 12003.m09271 protein gibberellin 20 oxidase …
Lus10031671	74	61.6667	1.39851	1.12174	38	45.3333	1.38646	1.72976	gibberellin 20-oxidase 3	moderately similar to ( 500) AT5G07200 | Symbols: YAP169, GA20OX3, ATGA20OX3 | YAP169; gibberellin 20-oxidase | chr5:2243835-2245157 REVERSEmoderately similar to ( 498) GAO1B_WHEAT Gibberellin 20 oxidase 1-B (EC 1.14.11.-) (Gibberellin C-20 oxidase 1-B) (GA 20-oxidase 1-B) (Ta20ox1B) (TaGA20ox1-B) - Triticum aestivum (Wheat)moderately similar to ( 439) loc_os03g63970 12003.m11264 protein gibberel…
Lus10026589	1.33333	29	1.04777	1.12174	2	21.3333	1.03726	1.3887	basic helix-loop-helix (bHLH) DNA-binding superfamily protein	weakly similar to ( 103) AT3G19500 | Symbols: | ethylene-responsive protein -related | chr3:6759289-6760893 REVERSEvery weakly similar to (90.1) loc_os03g55220 12003.m35423 protein helix-loop-helix DNA-binding, putative, expressed no original description
Lus10019435	458.667	1	1.04777	1.12174	95	1	4.13625	1.04765	2-oxoglutarate (2OG) and Fe(II)-dependent oxygenase superfamily protein	moderately similar to ( 323) AT1G06620 | Symbols: | 2-oxoglutarate-dependent dioxygenase, putative | chr1:2025618-2027094 FORWARDmoderately similar to ( 311) DV4H_CATRO Desacetoxyvindoline 4-hydroxylase (EC 1.14.11.20) - Catharanthus roseus (Rosy periwinkle) (Madagascar periwinkle)moderately similar to ( 251) loc_os04g10350 12004.m06287 protein 1-aminocyclopropane-1-carboxylate oxidase, putative,…
Lus10016227	18	1	1.04777	1.12174	3.33333	1	1.3822	1.04765	ethylene-responsive element binding factor 13	weakly similar to ( 122) AT2G44840 | Symbols: ATERF13, EREBP, ERF13 | ERF13 (ETHYLENE-RESPONSIVE ELEMENT BINDING FACTOR 13); DNA binding / transcription factor | chr2:18495440-18496120 FORWARDweakly similar to ( 115) ERF1_TOBAC Ethylene-responsive transcription factor 1 (Ethylene-responsive element-binding factor 1) (EREBP-1) (NtERF1) - Nicotiana tabacum (Common tobacco)very weakly similar to (97…
Lus10025987	1	180.333	1.04777	4.40851	1.33333	196	1.03726	44.6552	basic helix-loop-helix (bHLH) DNA-binding superfamily protein	weakly similar to ( 104) AT1G27660 | Symbols: | ethylene-responsive protein -related | chr1:9621701-9625666 FORWARDvery weakly similar to (89.7) loc_os01g01600 12001.m06805 protein expressed protein no original description
Lus10040167	15.3333	10.6667	2.09461	5.8693	23	8	1.38036	5.62422	Integrase-type DNA-binding superfamily protein	weakly similar to ( 122) AT5G07580 | Symbols: | DNA binding / transcription factor | chr5:2399525-2400349 FORWARDweakly similar to ( 115) ERF5_NICSY Ethylene-responsive transcription factor 5 (Ethylene-responsive element-binding factor 5 homolog) (EREBP-4) (NsERF4) - Nicotiana sylvestris (Wood tobacco)weakly similar to ( 114) loc_os10g41330 12010.m06897 protein ethylene-responsive transcription f…
Lus10027399	157.667	27.6667	1.04777	5.8693	36	22.6667	1.03726	26.7689	2-oxoglutarate (2OG) and Fe(II)-dependent oxygenase superfamily protein	highly similar to ( 509) AT4G25420 | Symbols: GA5, GA20OX1, AT2301, ATGA20OX1 | GA20OX1; gibberellin 20-oxidase | chr4:12990982-12992409 REVERSEhighly similar to ( 505) GAO1B_WHEAT Gibberellin 20 oxidase 1-B (EC 1.14.11.-) (Gibberellin C-20 oxidase 1-B) (GA 20-oxidase 1-B) (Ta20ox1B) (TaGA20ox1-B) - Triticum aestivum (Wheat)moderately similar to ( 452) loc_os03g63970 12003.m11264 protein gibberel…
Lus10039975	28.3333	53.6667	12.9293	7.20296	28.6667	50	11.105	6.50856	2-oxoglutarate (2OG) and Fe(II)-dependent oxygenase superfamily protein	moderately similar to ( 305) AT1G49390 | Symbols: | oxidoreductase, 2OG-Fe(II) oxygenase family protein | chr1:18279600-18280873 FORWARDweakly similar to ( 172) LDOX_MALDO Leucoanthocyanidin dioxygenase (EC 1.14.11.19) (LDOX) (Leucocyanidin oxygenase) (Leucoanthocyanidin hydroxylase) (Anthocyanidin synthase) - Malus domestica (Apple) (Malus sylvestris)moderately similar to ( 248) loc_os02g17940 1…
Lus10023669	764.333	512.667	730.896	10.982	800.667	493.333	631.103	139.224	basic helix-loop-helix (bHLH) DNA-binding superfamily protein	weakly similar to ( 191) AT4G29100 | Symbols: | ethylene-responsive family protein | chr4:14341140-14344575 FORWARDweakly similar to ( 171) loc_os02g17680 12002.m33639 protein helix-loop-helix DNA-binding, putative, expressed no original description
Lus10011476	84.6667	266.667	2.79344	12.4428	60	240.667	1.38646	7.52761	gibberellin 3-oxidase 1	moderately similar to ( 410) AT1G15550 | Symbols: GA4, ATGA3OX1, GA3OX1 | GA3OX1 (GIBBERELLIN 3-OXIDASE 1); gibberellin 3-beta-dioxygenase/ transcription factor binding | chr1:5344569-5346078 REVERSEmoderately similar to ( 276) G3O23_WHEAT Gibberellin 3-beta-dioxygenase 2-3 (EC 1.14.11.15) (Gibberellin 3 beta-hydroxylase 2-3) (Gibberellin 3-oxidase 2-3) - Triticum aestivum (Wheat)moderately simil…
Lus10021203	12.3333	184	10.838	12.4428	15.6667	275	9.32437	51.253	2-oxoglutarate (2OG) and Fe(II)-dependent oxygenase superfamily protein	moderately similar to ( 398) AT1G04350 | Symbols: | 2-oxoglutarate-dependent dioxygenase, putative | chr1:1165296-1166538 FORWARDmoderately similar to ( 340) DV4H_CATRO Desacetoxyvindoline 4-hydroxylase (EC 1.14.11.20) - Catharanthus roseus (Rosy periwinkle) (Madagascar periwinkle)moderately similar to ( 335) loc_os03g48430 12003.m09851 protein 1-aminocyclopropane-1-carboxylate oxidase, putative,…
Lus10011565	2.33333	3.66667	1.04777	12.9041	2.66667	7.33333	1.03726	508.449	1-amino-cyclopropane-1-carboxylate synthase 8	highly similar to ( 712) AT4G37770 | Symbols: ACS8 | ACS8; 1-aminocyclopropane-1-carboxylate synthase | chr4:17752222-17753925 FORWARDhighly similar to ( 698) 1A12_CUCMA 1-aminocyclopropane-1-carboxylate synthase CMA101 (EC 4.4.1.14) (ACC synthase) (S-adenosyl-L-methionine methylthioadenosine-lyase) - Cucurbita maxima (Pumpkin) (Winter squash)highly similar to ( 609) loc_os03g51740 12003.m10154 p…
Lus10038498	10.3333	14.3333	84.5883	14.2688	4.33333	15.3333	44.6386	108.552	Arabidopsis thaliana gibberellin 2-oxidase 1	moderately similar to ( 247) AT1G30040 | Symbols: ATGA2OX2 | ATGA2OX2 (GIBBERELLIN 2-OXIDASE); gibberellin 2-beta-dioxygenase | chr1:10537769-10538781 FORWARDmoderately similar to ( 247) G2OX1_PEA Gibberellin 2-beta-dioxygenase 1 (EC 1.14.11.13) (Gibberellin 2-beta-hydroxylase 1) (Gibberellin 2-oxidase 1) (GA 2-oxidase 1) (Protein SLENDER) - Pisum sativum (Garden pea)moderately similar to ( 233) …
Lus10031054	109.667	167.667	96.7819	19.9159	129.667	177.667	65.4698	58.3297	2-oxoglutarate (2OG) and Fe(II)-dependent oxygenase superfamily protein	moderately similar to ( 354) AT1G14130 | Symbols: | 2-oxoglutarate-dependent dioxygenase, putative | chr1:4836041-4837040 REVERSEweakly similar to ( 107) FL3H_MALDO Naringenin,2-oxoglutarate 3-dioxygenase (EC 1.14.11.9) (Flavonone-3-hydroxylase) (F3H) (FHT) - Malus domestica (Apple) (Malus sylvestris)moderately similar to ( 315) loc_os04g39980 12004.m08982 protein gibberellin 20 oxidase 2, putati…
Lus10011105	52.3333	86.6667	34.6429	21.7839	27.3333	50.6667	17.6616	16.5604	basic helix-loop-helix (bHLH) DNA-binding superfamily protein	weakly similar to ( 120) AT4G29100 | Symbols: | ethylene-responsive family protein | chr4:14341140-14344575 FORWARDvery weakly similar to (86.3) loc_os02g17680 12002.m33639 protein helix-loop-helix DNA-binding, putative, expressed no original description
Lus10023347	95.3333	88	264.784	23.0855	80.3333	96.6667	190.14	49.7458	ethylene-responsive nuclear protein / ethylene-regulated nuclear protein (ERT2)	very weakly similar to (81.3) AT4G20880 | Symbols: | ethylene-responsive nuclear protein / ethylene-regulated nuclear protein (ERT2) | chr4:11179389-11180606 REVERSE no original description
Lus10025619	1	1	1.04777	23.71	1	1	1.03726	1.73386	flavonol synthase 1	moderately similar to ( 334) AT5G08640 | Symbols: FLS | FLS (FLAVONOL SYNTHASE); flavonol synthase | chr5:2804009-2805175 FORWARDmoderately similar to ( 312) FLS_PETHY Flavonol synthase/flavanone 3-hydroxylase (EC 1.14.11.23) (EC 1.14.11.9) (FLS) - Petunia hybrida (Petunia)moderately similar to ( 318) loc_os02g52840 12002.m10314 protein flavonol synthase/flavanone 3-hydroxylase, putative, express…
Lus10033884	4.33333	9.33333	2.79344	24.1711	4	8.33333	4.14717	54.9864	Integrase-type DNA-binding superfamily protein	very weakly similar to (92.0) AT3G23220 | Symbols: | DNA binding / transcription factor | chr3:8287969-8288388 FORWARDvery weakly similar to (84.3) loc_os03g64260 12003.m11287 protein ethylene responsive element binding protein, putative, expressedAP2 AP2 no original description
Lus10007223	1.33333	8.66667	3.83507	26.1472	1	9.66667	4.1442	80.0668	1-amino-cyclopropane-1-carboxylate synthase 8	highly similar to ( 736) AT4G37770 | Symbols: ACS8 | ACS8; 1-aminocyclopropane-1-carboxylate synthase | chr4:17752222-17753925 FORWARDhighly similar to ( 705) 1A1C_MALDO 1-aminocyclopropane-1-carboxylate synthase (EC 4.4.1.14) (ACC synthase) (S-adenosyl-L-methionine methylthioadenosine-lyase) - Malus domestica (Apple) (Malus sylvestris)highly similar to ( 613) loc_os03g51740 12003.m10154 protein …
Lus10021202	70.3333	109.333	68.8552	26.4894	77	123.333	50.1687	90.156	2-oxoglutarate (2OG) and Fe(II)-dependent oxygenase superfamily protein	weakly similar to ( 164) AT1G06620 | Symbols: | 2-oxoglutarate-dependent dioxygenase, putative | chr1:2025618-2027094 FORWARDweakly similar to ( 139) DV4H_CATRO Desacetoxyvindoline 4-hydroxylase (EC 1.14.11.20) - Catharanthus roseus (Rosy periwinkle) (Madagascar periwinkle)weakly similar to ( 118) loc_os03g48430 12003.m09851 protein 1-aminocyclopropane-1-carboxylate oxidase, putative, expressed n…
Lus10005517	4.33333	939	2.44892	26.8064	5.33333	820.333	1.38036	204.005	Signal transduction histidine kinase, hybrid-type, ethylene sensor	highly similar to ( 914) AT3G04580 | Symbols: EIN4 | EIN4 (ETHYLENE INSENSITIVE 4); ethylene binding / glycogen synthase kinase 3/ protein histidine kinase/ receptor | chr3:1235576-1237965 REVERSEmoderately similar to ( 453) ETR1_MALDO Ethylene receptor (EC 2.7.13.3) - Malus domestica (Apple) (Malus sylvestris)highly similar to ( 679) loc_os04g08740 12004.m35115 protein ethylene receptor, putativ…
Lus10038899	116.333	50.3333	20.2777	27.0196	132	48	19.6908	75.8295	1-amino-cyclopropane-1-carboxylate synthase 12	highly similar to ( 676) AT5G51690 | Symbols: ACS12 | ACS12; 1-aminocyclopropane-1-carboxylate synthase/ L-aspartate:2-oxoglutarate aminotransferase/ aromatic-amino-acid:2-oxoglutarate aminotransferase | chr5:20999015-21000957 REVERSEmoderately similar to ( 416) 1A1C_MALDO 1-aminocyclopropane-1-carboxylate synthase (EC 4.4.1.14) (ACC synthase) (S-adenosyl-L-methionine methylthioadenosine-lyase) -…
Lus10011002	377.333	44.6667	123.77	27.9232	305	40.3333	142.852	31.0514	2-oxoglutarate (2OG) and Fe(II)-dependent oxygenase superfamily protein	weakly similar to ( 193) AT5G07480 | Symbols: | oxidoreductase, 2OG-Fe(II) oxygenase family protein | chr5:2367167-2369554 FORWARDvery weakly similar to ( 100) LDOX_PETHY Leucoanthocyanidin dioxygenase (EC 1.14.11.19) (LDOX) (Leucocyanidin oxygenase) (Leucoanthocyanidin hydroxylase) - Petunia hybrida (Petunia)moderately similar to ( 219) loc_os04g57180 12004.m10603 protein flavonol synthase/flava…
Lus10001460	1	614.333	1.04777	28.8767	1	389.333	1.03726	1.04765	2-oxoglutarate (2OG) and Fe(II)-dependent oxygenase superfamily protein	weakly similar to ( 133) AT2G36690 | Symbols: | oxidoreductase, 2OG-Fe(II) oxygenase family protein | chr2:15379930-15381987 FORWARDweakly similar to ( 105) LDOX_MALDO Leucoanthocyanidin dioxygenase (EC 1.14.11.19) (LDOX) (Leucocyanidin oxygenase) (Leucoanthocyanidin hydroxylase) (Anthocyanidin synthase) - Malus domestica (Apple) (Malus sylvestris)weakly similar to ( 157) loc_os08g37456 12008.m08…
Lus10025033	9.33333	482	13.6032	33.4971	87.3333	572.333	73.1693	65.4042	Adenine nucleotide alpha hydrolases-like superfamily protein	weakly similar to ( 129) AT3G62550 | Symbols: | universal stress protein (USP) family protein | chr3:23136194-23137074 FORWARDvery weakly similar to (99.4) loc_os05g28740 12005.m07159 protein universal stress protein, putative, expressedUsp no original description
Lus10005285	115.667	7.66667	426.266	33.9894	116.667	10.6667	853.125	3.44321	ethylene response factor 1	weakly similar to ( 113) AT3G23240 | Symbols: ERF1, ATERF1 | ERF1 (ETHYLENE RESPONSE FACTOR 1); DNA binding / transcription activator/ transcription factor | chr3:8295705-8296361 FORWARDvery weakly similar to (98.6) ERF2_NICSY Ethylene-responsive transcription factor 2 (Ethylene-responsive element-binding factor 2) (EREBP-2) (NsERF2) - Nicotiana sylvestris (Wood tobacco)very weakly similar to ( 1…
Lus10033198	44	236.667	22.0121	34.7718	50.6667	232.333	12.1467	93.3768	basic helix-loop-helix (bHLH) DNA-binding superfamily protein	weakly similar to ( 113) AT1G27660 | Symbols: | ethylene-responsive protein -related | chr1:9621701-9625666 FORWARDvery weakly similar to (88.2) loc_os01g01600 12001.m06805 protein expressed protein no original description
Lus10041230	6	3.33333	9.08986	36.0075	5.66667	3.33333	5.18571	5.83876	2-oxoglutarate (2OG) and Fe(II)-dependent oxygenase superfamily protein	moderately similar to ( 243) AT5G59530 | Symbols: | 2-oxoglutarate-dependent dioxygenase, putative | chr5:23994434-23995715 REVERSEmoderately similar to ( 214) DV4H_CATRO Desacetoxyvindoline 4-hydroxylase (EC 1.14.11.20) - Catharanthus roseus (Rosy periwinkle) (Madagascar periwinkle)moderately similar to ( 209) loc_os04g10350 12004.m06287 protein 1-aminocyclopropane-1-carboxylate oxidase, putativ…
Lus10038459	53.3333	40.6667	17.8024	37.1321	49	54	20.0321	8.89182	ethylene-responsive nuclear protein / ethylene-regulated nuclear protein (ERT2)	very weakly similar to (91.7) AT4G20880 | Symbols: | ethylene-responsive nuclear protein / ethylene-regulated nuclear protein (ERT2) | chr4:11179389-11180606 REVERSE no original description
Lus10032498	965.333	293.667	291.818	41.6546	1559	298.333	262.566	32.5767	Integrase-type DNA-binding superfamily protein	weakly similar to ( 139) AT5G07580 | Symbols: | DNA binding / transcription factor | chr5:2399525-2400349 FORWARDweakly similar to ( 102) ERF5_TOBAC Ethylene-responsive transcription factor 5 (Ethylene-responsive element-binding factor 5 homolog) (EREBP-4) (NtERF4) - Nicotiana tabacum (Common tobacco)weakly similar to ( 104) loc_os04g46240 12004.m09574 protein ethylene response factor 5, putative…
Lus10010013	22.6667	378.333	11.8531	41.9927	1135.33	616.333	87.5331	29.1703	Adenine nucleotide alpha hydrolases-like superfamily protein	weakly similar to ( 127) AT3G62550 | Symbols: | universal stress protein (USP) family protein | chr3:23136194-23137074 FORWARDvery weakly similar to ( 100) loc_os05g28740 12005.m07159 protein universal stress protein, putative, expressedUsp no original description
Lus10002314	1	15.3333	1.04777	44.8873	1	24	1.03726	26.1604	Acyl-CoA N-acyltransferases (NAT) superfamily protein	moderately similar to ( 340) AT4G37580 | Symbols: HLS1, COP3, UNS2 | HLS1 (HOOKLESS 1); N-acetyltransferase | chr4:17658932-17660564 FORWARDmoderately similar to ( 307) loc_os03g55530 12003.m10466 protein HLS1, putative, expressed no original description
Lus10040112	1.33333	2	11.5209	49.585	4	2.33333	31.4294	9.62517	senescence-related gene 1	moderately similar to ( 321) AT1G17020 | Symbols: SRG1, ATSRG1 | SRG1 (SENESCENCE-RELATED GENE 1); oxidoreductase, acting on diphenols and related substances as donors, oxygen as acceptor / oxidoreductase, acting on paired donors, with incorporation or reduction of molecular oxygen, 2-oxoglutarate as one donor, and inc | chr1:5820258-5821741 FORWARDweakly similar to ( 188) FLS_PETHY Flavonol synt…
Lus10006574	26	1169.33	16.0874	50	20.6667	974	10.0215	264.872	Signal transduction histidine kinase, hybrid-type, ethylene sensor	highly similar to ( 909) AT3G04580 | Symbols: EIN4 | EIN4 (ETHYLENE INSENSITIVE 4); ethylene binding / glycogen synthase kinase 3/ protein histidine kinase/ receptor | chr3:1235576-1237965 REVERSEmoderately similar to ( 456) ETR1_MALDO Ethylene receptor (EC 2.7.13.3) - Malus domestica (Apple) (Malus sylvestris)highly similar to ( 674) loc_os04g08740 12004.m35115 protein ethylene receptor, putativ…
Lus10035076	1	1	1.04777	54.7747	1	1	1.03726	45.6527	DORNROSCHEN-like	AP2 AP2 no original description
Lus10003562	29.3333	213	9.78946	58.8708	28.3333	214	6.93472	65.1127	ethylene response factor 1	weakly similar to ( 135) AT3G23240 | Symbols: ERF1, ATERF1 | ERF1 (ETHYLENE RESPONSE FACTOR 1); DNA binding / transcription activator/ transcription factor | chr3:8295705-8296361 FORWARDvery weakly similar to (94.0) ERF5_TOBAC Ethylene-responsive transcription factor 5 (Ethylene-responsive element-binding factor 5 homolog) (EREBP-4) (NtERF4) - Nicotiana tabacum (Common tobacco)weakly similar to (…
Lus10008564	34	7864.67	21.6788	61.8365	28.3333	7531.33	21.7457	225.951	ACC oxidase 1	moderately similar to ( 404) AT2G19590 | Symbols: ACO1 | ACO1 (ACC OXIDASE 1); 1-aminocyclopropane-1-carboxylate oxidase | chr2:8476239-8477354 REVERSEmoderately similar to ( 303) ACCO1_MALDO 1-aminocyclopropane-1-carboxylate oxidase 1 (EC 1.14.17.4) (ACC oxidase 1) (Ethylene-forming enzyme) (EFE) (Protein AP4) (PAE12) - Malus domestica (Apple) (Malus sylvestris)moderately similar to ( 342) loc_o…
Lus10021204	40.3333	29	30.0266	63.9835	35.3333	46	39.0635	70.7546	2-oxoglutarate (2OG) and Fe(II)-dependent oxygenase superfamily protein	weakly similar to ( 186) AT5G59530 | Symbols: | 2-oxoglutarate-dependent dioxygenase, putative | chr5:23994434-23995715 REVERSEweakly similar to ( 173) DV4H_CATRO Desacetoxyvindoline 4-hydroxylase (EC 1.14.11.20) - Catharanthus roseus (Rosy periwinkle) (Madagascar periwinkle)weakly similar to ( 162) loc_os04g10350 12004.m06287 protein 1-aminocyclopropane-1-carboxylate oxidase, putative, expressed…
Lus10006518	44.6667	730	41.6126	64.635	36.3333	904.333	73.0952	415.941	2-oxoglutarate (2OG) and Fe(II)-dependent oxygenase superfamily protein	highly similar to ( 520) AT3G21420 | Symbols: | oxidoreductase, 2OG-Fe(II) oxygenase family protein | chr3:7541579-7543221 FORWARDmoderately similar to ( 204) FLS_SOLTU Flavonol synthase/flavanone 3-hydroxylase (EC 1.14.11.23) (EC 1.14.11.9) (FLS) - Solanum tuberosum (Potato)moderately similar to ( 442) loc_os01g70930 12001.m13137 protein flavonol synthase/flavanone 3-hydroxylase, putative, expre…
Lus10022196	778.333	386.333	115.696	66.3398	735.333	267.333	114.027	69.0958	2-oxoglutarate (2OG) and Fe(II)-dependent oxygenase superfamily protein	moderately similar to ( 381) AT5G59530 | Symbols: | 2-oxoglutarate-dependent dioxygenase, putative | chr5:23994434-23995715 REVERSEmoderately similar to ( 326) DV4H_CATRO Desacetoxyvindoline 4-hydroxylase (EC 1.14.11.20) - Catharanthus roseus (Rosy periwinkle) (Madagascar periwinkle)moderately similar to ( 327) loc_os04g10350 12004.m06287 protein 1-aminocyclopropane-1-carboxylate oxidase, putativ…
Lus10012912	3	7	4.54804	69.1002	4	6.66667	7.23267	16.5827	gibberellin 2-oxidase 8	moderately similar to ( 363) AT4G21200 | Symbols: ATGA2OX8, GA2OX8 | GA2OX8 (GIBBERELLIN 2-OXIDASE 8); gibberellin 2-beta-dioxygenase | chr4:11302751-11304032 FORWARDweakly similar to ( 149) GAO1B_WHEAT Gibberellin 20 oxidase 1-B (EC 1.14.11.-) (Gibberellin C-20 oxidase 1-B) (GA 20-oxidase 1-B) (Ta20ox1B) (TaGA20ox1-B) - Triticum aestivum (Wheat)moderately similar to ( 380) loc_os04g44150 12004.m…
Lus10021212	17.3333	993	171.817	70.5571	26.6667	864	60.2617	384.976	Signal transduction histidine kinase, hybrid-type, ethylene sensor	highly similar to ( 857) AT3G23150 | Symbols: ETR2 | ETR2 (ethylene response 2); ethylene binding / glycogen synthase kinase 3/ protein histidine kinase/ receptor | chr3:8255156-8257560 FORWARDmoderately similar to ( 462) ETR1_CUCSA Ethylene receptor (EC 2.7.13.3) (CS-ETR1) - Cucumis sativus (Cucumber)highly similar to ( 699) loc_os04g08740 12004.m35115 protein ethylene receptor, putative, expres…
Lus10042995	179.333	43.3333	61.5162	76.1692	367.333	86.3333	36.7451	36.7068	Integrase-type DNA-binding superfamily protein	weakly similar to ( 126) AT5G07580 | Symbols: | DNA binding / transcription factor | chr5:2399525-2400349 FORWARDvery weakly similar to (97.8) ERF5_NICSY Ethylene-responsive transcription factor 5 (Ethylene-responsive element-binding factor 5 homolog) (EREBP-4) (NsERF4) - Nicotiana sylvestris (Wood tobacco)weakly similar to ( 102) loc_os04g46240 12004.m09574 protein ethylene response factor 5, pu…
Lus10040380	474.333	38.6667	126.185	76.2233	809.333	26.6667	116.183	32.7299	2-oxoglutarate (2OG) and Fe(II)-dependent oxygenase superfamily protein	moderately similar to ( 375) AT1G06620 | Symbols: | 2-oxoglutarate-dependent dioxygenase, putative | chr1:2025618-2027094 FORWARDmoderately similar to ( 329) DV4H_CATRO Desacetoxyvindoline 4-hydroxylase (EC 1.14.11.20) - Catharanthus roseus (Rosy periwinkle) (Madagascar periwinkle)moderately similar to ( 300) loc_os03g48430 12003.m09851 protein 1-aminocyclopropane-1-carboxylate oxidase, putative,…
Lus10014134	62.3333	7	18.5214	78.1723	49	4.33333	15.1772	7.68898	leucoanthocyanidin dioxygenase	moderately similar to ( 496) AT4G22880 | Symbols: LDOX, TDS4, TT18, ANS | LDOX (LEUCOANTHOCYANIDIN DIOXYGENASE); leucocyanidin oxygenase | chr4:12004905-12006059 REVERSEhighly similar to ( 514) LDOX_MALDO Leucoanthocyanidin dioxygenase (EC 1.14.11.19) (LDOX) (Leucocyanidin oxygenase) (Leucoanthocyanidin hydroxylase) (Anthocyanidin synthase) - Malus domestica (Apple) (Malus sylvestris)moderately s…
Lus10027064	370	419.333	237.827	87.5252	171.667	367.333	326.924	74.8372	basic helix-loop-helix (bHLH) DNA-binding superfamily protein	weakly similar to ( 164) AT1G05710 | Symbols: | ethylene-responsive protein, putative | chr1:1716198-1717023 FORWARDweakly similar to ( 116) loc_os04g41570 12004.m101563 protein ER33 protein, putative, expressed no original description
Lus10023499	188.667	2.33333	13851.4	89.1182	631.333	13.3333	14273.2	23.6506	2-oxoglutarate (2OG) and Fe(II)-dependent oxygenase superfamily protein	moderately similar to ( 389) AT1G06620 | Symbols: | 2-oxoglutarate-dependent dioxygenase, putative | chr1:2025618-2027094 FORWARDmoderately similar to ( 356) DV4H_CATRO Desacetoxyvindoline 4-hydroxylase (EC 1.14.11.20) - Catharanthus roseus (Rosy periwinkle) (Madagascar periwinkle)moderately similar to ( 305) loc_os04g10350 12004.m06287 protein 1-aminocyclopropane-1-carboxylate oxidase, putative,…
Lus10024882	516.333	612.333	349.176	90.1179	383.667	655.667	276.189	218.003	2-oxoglutarate (2OG) and Fe(II)-dependent oxygenase superfamily protein	moderately similar to ( 253) AT5G24530 | Symbols: DMR6 | DMR6 (DOWNY MILDEW RESISTANT 6); oxidoreductase/ oxidoreductase, acting on paired donors, with incorporation or reduction of molecular oxygen, 2-oxoglutarate as one donor, and incorporation of one atom each of oxygen into both donors | chr5:8378964-8383154 FORWARDweakly similar to ( 193) FLS_PETHY Flavonol synthase/flavanone 3-hydroxylase (…
Lus10032695	1.33333	13	2.09461	94.2501	2	23.6667	1.72346	61.1812	1-amino-cyclopropane-1-carboxylate synthase 7	highly similar to ( 661) AT4G26200 | Symbols: ACS7, ATACS7 | ACS7; 1-aminocyclopropane-1-carboxylate synthase | chr4:13275307-13276946 FORWARDhighly similar to ( 555) 1A1C_MALDO 1-aminocyclopropane-1-carboxylate synthase (EC 4.4.1.14) (ACC synthase) (S-adenosyl-L-methionine methylthioadenosine-lyase) - Malus domestica (Apple) (Malus sylvestris)highly similar to ( 605) loc_os05g10780 12005.m05548 …
Lus10009238	76.6667	138.333	28.6315	97.0795	101.333	137.333	26.6396	108.81	2-oxoglutarate (2OG) and Fe(II)-dependent oxygenase superfamily protein	moderately similar to ( 249) AT1G06640 | Symbols: | 2-oxoglutarate-dependent dioxygenase, putative | chr1:2032366-2033527 FORWARDmoderately similar to ( 231) DV4H_CATRO Desacetoxyvindoline 4-hydroxylase (EC 1.14.11.20) - Catharanthus roseus (Rosy periwinkle) (Madagascar periwinkle)moderately similar to ( 206) loc_os03g48430 12003.m09851 protein 1-aminocyclopropane-1-carboxylate oxidase, putative,…
Lus10021193	18.6667	48.6667	451.023	99.7458	23.6667	42.3333	372.675	340.29	ethylene response factor 1	weakly similar to ( 167) AT3G23240 | Symbols: ERF1, ATERF1 | ERF1 (ETHYLENE RESPONSE FACTOR 1); DNA binding / transcription activator/ transcription factor | chr3:8295705-8296361 FORWARDvery weakly similar to (80.1) ERF5_TOBAC Ethylene-responsive transcription factor 5 (Ethylene-responsive element-binding factor 5 homolog) (EREBP-4) (NtERF4) - Nicotiana tabacum (Common tobacco)weakly similar to (…
Lus10001711	1221	334.667	1559.14	101.649	1187.67	324.667	1479.36	156.143	2-oxoglutarate (2OG) and Fe(II)-dependent oxygenase superfamily protein	weakly similar to ( 188) AT2G36690 | Symbols: | oxidoreductase, 2OG-Fe(II) oxygenase family protein | chr2:15379930-15381987 FORWARDweakly similar to ( 149) FLS_PETHY Flavonol synthase/flavanone 3-hydroxylase (EC 1.14.11.23) (EC 1.14.11.9) (FLS) - Petunia hybrida (Petunia)moderately similar to ( 215) loc_os08g37456 12008.m080186 protein flavonol synthase/flavanone 3-hydroxylase, putative, express…
Lus10040382	21.3333	6.66667	15262.1	109.22	10.6667	8.33333	13908.3	7.56825	2-oxoglutarate (2OG) and Fe(II)-dependent oxygenase superfamily protein	moderately similar to ( 395) AT1G06620 | Symbols: | 2-oxoglutarate-dependent dioxygenase, putative | chr1:2025618-2027094 FORWARDmoderately similar to ( 347) DV4H_CATRO Desacetoxyvindoline 4-hydroxylase (EC 1.14.11.20) - Catharanthus roseus (Rosy periwinkle) (Madagascar periwinkle)moderately similar to ( 309) loc_os04g10350 12004.m06287 protein 1-aminocyclopropane-1-carboxylate oxidase, putative,…
Lus10017907	1	1	1.74395	111.063	1	1	1.03726	302.154	DORNROSCHEN-like	AP2 AP2 no original description
Lus10014807	24.3333	53.3333	29.0407	113.857	25.3333	70.3333	22.1053	434.187	basic helix-loop-helix (bHLH) DNA-binding superfamily protein	weakly similar to ( 126) AT3G20640 | Symbols: | ethylene-responsive protein -related | chr3:7210654-7213199 REVERSEweakly similar to ( 102) loc_os05g42180 12005.m08391 protein conserved hypothetical protein no original description
Lus10021002	36.6667	115.667	23.7582	113.899	7.66667	115.667	60.919	1365.84	2-oxoglutarate (2OG) and Fe(II)-dependent oxygenase superfamily protein	moderately similar to ( 362) AT3G19000 | Symbols: | oxidoreductase, 2OG-Fe(II) oxygenase family protein | chr3:6554004-6554987 REVERSEweakly similar to ( 158) FLS_PETHY Flavonol synthase/flavanone 3-hydroxylase (EC 1.14.11.23) (EC 1.14.11.9) (FLS) - Petunia hybrida (Petunia)moderately similar to ( 384) loc_os03g42130 12003.m09271 protein gibberellin 20 oxidase 2, putative, expressed PcbC 2OG-FeII…
Lus10013959	81.6667	46.6667	475.257	115.02	85.6667	80.6667	1162.77	156.199	ethylene response factor 1	very weakly similar to (96.3) AT3G23240 | Symbols: ERF1, ATERF1 | ERF1 (ETHYLENE RESPONSE FACTOR 1); DNA binding / transcription activator/ transcription factor | chr3:8295705-8296361 FORWARDvery weakly similar to (84.0) ERF2_NICSY Ethylene-responsive transcription factor 2 (Ethylene-responsive element-binding factor 2) (EREBP-2) (NsERF2) - Nicotiana sylvestris (Wood tobacco)very weakly similar t…
Lus10034940	488	427.667	1558.52	128.125	450	464.667	1649.24	281.701	basic helix-loop-helix (bHLH) DNA-binding superfamily protein	weakly similar to ( 155) AT4G29100 | Symbols: | ethylene-responsive family protein | chr4:14341140-14344575 FORWARDweakly similar to ( 129) loc_os02g17680 12002.m33639 protein helix-loop-helix DNA-binding, putative, expressed no original description
Lus10030934	1.33333	2.33333	90.7097	128.453	3	4.66667	177.132	38.5598	senescence-related gene 1	moderately similar to ( 328) AT1G17020 | Symbols: SRG1, ATSRG1 | SRG1 (SENESCENCE-RELATED GENE 1); oxidoreductase, acting on diphenols and related substances as donors, oxygen as acceptor / oxidoreductase, acting on paired donors, with incorporation or reduction of molecular oxygen, 2-oxoglutarate as one donor, and inc | chr1:5820258-5821741 FORWARDweakly similar to ( 194) FLS_PETHY Flavonol synt…
Lus10007357	412.667	379.333	668.662	135.621	467.333	365.333	621.488	347.345	Signal transduction histidine kinase, hybrid-type, ethylene sensor	nearly identical (1139) AT1G66340 | Symbols: ETR1, EIN1, ETR | ETR1 (ETHYLENE RESPONSE 1); ethylene binding / protein histidine kinase/ two-component response regulator | chr1:24734698-24737366 FORWARDnearly identical (1212) ETR1_PRUPE Ethylene receptor (EC 2.7.13.3) - Prunus persica (Peach)highly similar to ( 904) loc_os03g49500 12003.m34910 protein ethylene receptor, putative, expressed PRK1110…
Lus10006676	678.667	149	244.541	138.276	596.667	125.333	276.718	93.321	ACC synthase 10	highly similar to ( 597) AT1G62960 | Symbols: ACS10 | ACS10 (ACC SYNTHASE 10); 1-aminocyclopropane-1-carboxylate synthase/ L-aspartate:2-oxoglutarate aminotransferase/ aromatic-amino-acid:2-oxoglutarate aminotransferase | chr1:23318271-23320229 REVERSEmoderately similar to ( 399) 1A1C_SOYBN 1-aminocyclopropane-1-carboxylate synthase (EC 4.4.1.14) (ACC synthase) (S-adenosyl-L-methionine methylthio…
Lus10002892	18.6667	434	2.09461	139.728	15	290	1.03726	88.8873	2-oxoglutarate (2OG) and Fe(II)-dependent oxygenase superfamily protein	moderately similar to ( 380) AT1G06620 | Symbols: | 2-oxoglutarate-dependent dioxygenase, putative | chr1:2025618-2027094 FORWARDmoderately similar to ( 352) DV4H_CATRO Desacetoxyvindoline 4-hydroxylase (EC 1.14.11.20) - Catharanthus roseus (Rosy periwinkle) (Madagascar periwinkle)moderately similar to ( 283) loc_os03g48430 12003.m09851 protein 1-aminocyclopropane-1-carboxylate oxidase, putative,…
Lus10025599	780.667	329.333	228.24	147.309	553	338.333	490.113	179.813	basic helix-loop-helix (bHLH) DNA-binding superfamily protein	weakly similar to ( 159) AT1G05710 | Symbols: | ethylene-responsive protein, putative | chr1:1716198-1717023 FORWARDweakly similar to ( 116) loc_os04g41570 12004.m101563 protein ER33 protein, putative, expressed no original description
Lus10018836	30.6667	13	7.67285	154.531	31.3333	10.6667	5.87915	648.898	2-oxoglutarate (2OG) and Fe(II)-dependent oxygenase superfamily protein	moderately similar to ( 330) AT4G23340 | Symbols: | oxidoreductase, 2OG-Fe(II) oxygenase family protein | chr4:12195719-12196793 REVERSEweakly similar to ( 129) GAO1D_WHEAT Gibberellin 20 oxidase 1-D (EC 1.14.11.-) (Gibberellin C-20 oxidase 1-D) (GA 20-oxidase 1-D) (Ta20ox1D) (TaGA20ox1-D) (Protein Wga20) - Triticum aestivum (Wheat)weakly similar to ( 122) loc_os03g63970 12003.m11264 protein gibb…
Lus10008579	2	25.6667	1.04777	154.847	1.66667	23.3333	1.38646	13.9607	1-amino-cyclopropane-1-carboxylate synthase 7	highly similar to ( 666) AT4G26200 | Symbols: ACS7, ATACS7 | ACS7; 1-aminocyclopropane-1-carboxylate synthase | chr4:13275307-13276946 FORWARDhighly similar to ( 552) 1A1C_MALDO 1-aminocyclopropane-1-carboxylate synthase (EC 4.4.1.14) (ACC synthase) (S-adenosyl-L-methionine methylthioadenosine-lyase) - Malus domestica (Apple) (Malus sylvestris)highly similar to ( 607) loc_os05g10780 12005.m05548 …
Lus10018950	1	1.33333	1.04777	155.838	1	1	1.03726	23.9126	2-oxoglutarate (2OG) and Fe(II)-dependent oxygenase superfamily protein	weakly similar to ( 145) AT3G60290 | Symbols: | oxidoreductase/ oxidoreductase, acting on paired donors, with incorporation or reduction of molecular oxygen, 2-oxoglutarate as one donor, and incorporation of one atom each of oxygen into both donors | chr3:22282662-22284414 FORWARDweakly similar to ( 118) ACCO_DIACA Probable 1-aminocyclopropane-1-carboxylate oxidase (EC 1.14.17.4) (ACC oxidase) (E…
Lus10020999	410	396	396.648	157.329	311	412.667	333.517	209.104	2-oxoglutarate (2OG) and Fe(II)-dependent oxygenase superfamily protein	moderately similar to ( 430) AT3G19000 | Symbols: | oxidoreductase, 2OG-Fe(II) oxygenase family protein | chr3:6554004-6554987 REVERSEweakly similar to ( 154) FL3H_VITVI Naringenin,2-oxoglutarate 3-dioxygenase (EC 1.14.11.9) (Flavonone-3-hydroxylase) (F3H) (FHT) - Vitis vinifera (Grape)moderately similar to ( 315) loc_os03g42130 12003.m09271 protein gibberellin 20 oxidase 2, putative, expressed P…
Lus10036082	141.333	48.6667	58.4083	176.882	127.333	48.6667	38.3424	93.3012	2-oxoglutarate (2OG) and Fe(II)-dependent oxygenase superfamily protein	moderately similar to ( 367) AT1G55290 | Symbols: | oxidoreductase, 2OG-Fe(II) oxygenase family protein | chr1:20626208-20627397 REVERSEweakly similar to ( 160) DV4H_CATRO Desacetoxyvindoline 4-hydroxylase (EC 1.14.11.20) - Catharanthus roseus (Rosy periwinkle) (Madagascar periwinkle)weakly similar to ( 171) loc_os04g49194 12004.m09854 protein naringenin,2-oxoglutarate 3-dioxygenase, putative, ex…
Lus10031898	503.667	372.333	581.431	184.111	469.333	343	477.304	245.458	D-cysteine desulfhydrase	highly similar to ( 561) AT1G48420 | Symbols: D-CDES | D-CDES (D-CYSTEINE DESULFHYDRASE); 1-aminocyclopropane-1-carboxylate deaminase/ D-cysteine desulfhydrase/ catalytic | chr1:17896767-17898803 REVERSEhighly similar to ( 577) loc_os02g53330 12002.m100439 protein 1-aminocyclopropane-1-carboxylate deaminase, putative, expressedPRK03910 Acd PRK12390 no original description
Lus10024230	11.3333	54.3333	59.6885	197.636	11.6667	157.333	189.605	203.328	2-oxoglutarate (2OG) and Fe(II)-dependent oxygenase superfamily protein	weakly similar to ( 139) AT3G19000 | Symbols: | oxidoreductase, 2OG-Fe(II) oxygenase family protein | chr3:6554004-6554987 REVERSEweakly similar to ( 127) ACCO2_MALDO 1-aminocyclopropane-1-carboxylate oxidase 2 (EC 1.14.17.4) (ACC oxidase 2) (Ethylene-forming enzyme) (EFE) - Malus domestica (Apple) (Malus sylvestris)moderately similar to ( 326) loc_os04g55070 12004.m10399 protein gibberellin 20 o…
Lus10007021	2127.67	126.667	6369.35	202.243	1881	140	4545.56	83.3222	ACC synthase 10	highly similar to ( 593) AT1G62960 | Symbols: ACS10 | ACS10 (ACC SYNTHASE 10); 1-aminocyclopropane-1-carboxylate synthase/ L-aspartate:2-oxoglutarate aminotransferase/ aromatic-amino-acid:2-oxoglutarate aminotransferase | chr1:23318271-23320229 REVERSEmoderately similar to ( 400) 1A1C_MALDO 1-aminocyclopropane-1-carboxylate synthase (EC 4.4.1.14) (ACC synthase) (S-adenosyl-L-methionine methylthio…
Lus10000857	12	224.333	76.7834	208.423	11	278	146.239	1266.8	2-oxoglutarate (2OG) and Fe(II)-dependent oxygenase superfamily protein	moderately similar to ( 417) AT1G77330 | Symbols: | 1-aminocyclopropane-1-carboxylate oxidase, putative / ACC oxidase, putative | chr1:29063215-29064447 REVERSEmoderately similar to ( 304) ACCO_ACTCH 1-aminocyclopropane-1-carboxylate oxidase (EC 1.14.17.4) (ACC oxidase) (Ethylene-forming enzyme) (EFE) - Actinidia chinensis (Kiwi) (Yangtao)moderately similar to ( 383) loc_os05g05680 12005.m27705 p…
Lus10042493	2	37	19.2116	210.524	1.66667	40	17.6355	346.777	senescence-related gene 1	moderately similar to ( 207) AT1G17020 | Symbols: SRG1, ATSRG1 | SRG1 (SENESCENCE-RELATED GENE 1); oxidoreductase, acting on diphenols and related substances as donors, oxygen as acceptor / oxidoreductase, acting on paired donors, with incorporation or reduction of molecular oxygen, 2-oxoglutarate as one donor, and inc | chr1:5820258-5821741 FORWARDvery weakly similar to (93.2) GAO1B_WHEAT Gibber…
Lus10025430	8.66667	28.3333	32.1369	221.017	4	24	26.9322	336.263	ethylene response factor 1	very weakly similar to (90.9) AT5G47220 | Symbols: ATERF2, ATERF-2, ERF2 | ERF2 (ETHYLENE RESPONSIVE ELEMENT BINDING FACTOR 2); DNA binding / transcription activator/ transcription factor | chr5:19172023-19172754 REVERSEvery weakly similar to (84.3) ERF2_NICSY Ethylene-responsive transcription factor 2 (Ethylene-responsive element-binding factor 2) (EREBP-2) (NsERF2) - Nicotiana sylvestris (Wood …
Lus10021880	36.6667	83.6667	122.191	226.162	105.333	102.333	109.252	438.519	Signal transduction histidine kinase, hybrid-type, ethylene sensor	highly similar to ( 801) AT3G23150 | Symbols: ETR2 | ETR2 (ethylene response 2); ethylene binding / glycogen synthase kinase 3/ protein histidine kinase/ receptor | chr3:8255156-8257560 FORWARDmoderately similar to ( 459) ETR1_BRAOL Ethylene receptor (EC 2.7.13.3) - Brassica oleracea (Wild cabbage)highly similar to ( 664) loc_os04g08740 12004.m35115 protein ethylene receptor, putative, expressed …
Lus10031325	571	448.333	333.106	226.966	537.667	442	269.333	200.182	D-cysteine desulfhydrase	moderately similar to ( 335) AT1G48420 | Symbols: D-CDES | D-CDES (D-CYSTEINE DESULFHYDRASE); 1-aminocyclopropane-1-carboxylate deaminase/ D-cysteine desulfhydrase/ catalytic | chr1:17896767-17898803 REVERSEmoderately similar to ( 360) loc_os02g53330 12002.m100439 protein 1-aminocyclopropane-1-carboxylate deaminase, putative, expressedPRK03910 Acd PRK12390 no original description
Lus10004746	937	349.667	329.559	231.187	909.667	343	332.909	187.172	2-oxoglutarate (2OG) and Fe(II)-dependent oxygenase superfamily protein	moderately similar to ( 305) AT4G16765 | Symbols: | oxidoreductase, 2OG-Fe(II) oxygenase family protein | chr4:9430467-9431791 REVERSEweakly similar to ( 107) LDOX_MALDO Leucoanthocyanidin dioxygenase (EC 1.14.11.19) (LDOX) (Leucocyanidin oxygenase) (Leucoanthocyanidin hydroxylase) (Anthocyanidin synthase) - Malus domestica (Apple) (Malus sylvestris)moderately similar to ( 354) loc_os10g37899 120…
Lus10007820	798.333	434	948.887	271.495	737	432.667	820.929	194.672	2-oxoglutarate (2OG) and Fe(II)-dependent oxygenase superfamily protein	moderately similar to ( 259) AT4G16770 | Symbols: | iron ion binding / oxidoreductase/ oxidoreductase, acting on paired donors, with incorporation or reduction of molecular oxygen, 2-oxoglutarate as one donor, and incorporation of one atom each of oxygen into both donors | chr4:9435116-9437168 REVERSEvery weakly similar to (95.1) LDOX_MALDO Leucoanthocyanidin dioxygenase (EC 1.14.11.19) (LDOX) (L…
Lus10030941	701.667	50	14120.6	279.864	615.333	93	25585.8	141.818	2-oxoglutarate (2OG) and Fe(II)-dependent oxygenase superfamily protein	moderately similar to ( 251) AT1G17020 | Symbols: SRG1, ATSRG1 | SRG1 (SENESCENCE-RELATED GENE 1); oxidoreductase, acting on diphenols and related substances as donors, oxygen as acceptor / oxidoreductase, acting on paired donors, with incorporation or reduction of molecular oxygen, 2-oxoglutarate as one donor, and inc | chr1:5820258-5821741 FORWARDweakly similar to ( 157) FLS_SOLTU Flavonol synt…
Lus10028760	69	288.333	15.0185	290.792	78.3333	325	16.6028	220.427	1-aminocyclopropane-1-carboxylic acid (acc) synthase 6	highly similar to ( 580) AT4G11280 | Symbols: ACS6 | ACS6 (1-AMINOCYCLOPROPANE-1-CARBOXYLIC ACID (ACC) SYNTHASE 6); 1-aminocyclopropane-1-carboxylate synthase | chr4:6864168-6865922 FORWARDhighly similar to ( 613) 1A1C_SOYBN 1-aminocyclopropane-1-carboxylate synthase (EC 4.4.1.14) (ACC synthase) (S-adenosyl-L-methionine methylthioadenosine-lyase) - Glycine max (Soybean)highly similar to ( 546) lo…
Lus10017945	1050	752.667	899.083	300.332	982.667	811.333	1400.71	524.109	multiprotein bridging factor 1B	weakly similar to ( 177) AT3G58680 | Symbols: MBF1B, ATMBF1B | MBF1B (MULTIPROTEIN BRIDGING FACTOR 1B); DNA binding / transcription coactivator | chr3:21707367-21708625 FORWARDweakly similar to ( 168) loc_os08g27850 12008.m080145 protein endothelial differentiation-related factor 1, putative, expressed no original description
Lus10013415	278.667	1454.33	1047.56	301.587	286	1284.67	551.821	882.105	ethylene response sensor 1	highly similar to ( 859) AT2G40940 | Symbols: ERS1, ERS | ERS1 (ETHYLENE RESPONSE SENSOR 1); ethylene binding / protein histidine kinase/ receptor | chr2:17084635-17086819 REVERSEhighly similar to ( 849) ETR1_CUCSA Ethylene receptor (EC 2.7.13.3) (CS-ETR1) - Cucumis sativus (Cucumber)highly similar to ( 879) loc_os03g49500 12003.m34910 protein ethylene receptor, putative, expressed PRK11107 PRK10…
Lus10000711	1718.33	730	3272.67	303.596	1450.33	708.333	2284.7	542.573	2-oxoglutarate (2OG) and Fe(II)-dependent oxygenase superfamily protein	moderately similar to ( 246) AT5G24530 | Symbols: DMR6 | DMR6 (DOWNY MILDEW RESISTANT 6); oxidoreductase/ oxidoreductase, acting on paired donors, with incorporation or reduction of molecular oxygen, 2-oxoglutarate as one donor, and incorporation of one atom each of oxygen into both donors | chr5:8378964-8383154 FORWARDweakly similar to ( 177) FLS_PETHY Flavonol synthase/flavanone 3-hydroxylase (…
Lus10032574	428.333	358.333	1611.84	324.384	386.667	405.667	1594.34	435.908	2-oxoglutarate (2OG) and Fe(II)-dependent oxygenase superfamily protein	moderately similar to ( 410) AT4G25300 | Symbols: | oxidoreductase, 2OG-Fe(II) oxygenase family protein | chr4:12945780-12946642 FORWARDweakly similar to ( 183) FLS_PETHY Flavonol synthase/flavanone 3-hydroxylase (EC 1.14.11.23) (EC 1.14.11.9) (FLS) - Petunia hybrida (Petunia)moderately similar to ( 312) loc_os10g40880 12010.m06856 protein flavonol synthase/flavanone 3-hydroxylase, putative, expr…
Lus10010310	433	1829.33	663.159	324.705	416.333	1615.33	356.255	1212.84	ethylene response sensor 1	highly similar to ( 860) AT2G40940 | Symbols: ERS1, ERS | ERS1 (ETHYLENE RESPONSE SENSOR 1); ethylene binding / protein histidine kinase/ receptor | chr2:17084635-17086819 REVERSEhighly similar to ( 844) ETR1_PRUPE Ethylene receptor (EC 2.7.13.3) - Prunus persica (Peach)highly similar to ( 879) loc_os03g49500 12003.m34910 protein ethylene receptor, putative, expressed PRK11107 PRK10841 PRK11091 B…
Lus10015896	296	614.667	554.165	332.559	275.667	584.667	605.993	446.331	Adenine nucleotide alpha hydrolases-like superfamily protein	weakly similar to ( 179) AT1G09740 | Symbols: | ethylene-responsive protein, putative | chr1:3154603-3155834 FORWARDweakly similar to ( 188) loc_os02g52314 12002.m10262 protein ER6 protein, putative, expressed no original description
Lus10022415	541.333	10.3333	5217.05	340.788	413.333	10.6667	3648.22	76.2755	2-oxoglutarate (2OG) and Fe(II)-dependent oxygenase superfamily protein	moderately similar to ( 432) AT1G06620 | Symbols: | 2-oxoglutarate-dependent dioxygenase, putative | chr1:2025618-2027094 FORWARDmoderately similar to ( 367) DV4H_CATRO Desacetoxyvindoline 4-hydroxylase (EC 1.14.11.20) - Catharanthus roseus (Rosy periwinkle) (Madagascar periwinkle)moderately similar to ( 337) loc_os03g48430 12003.m09851 protein 1-aminocyclopropane-1-carboxylate oxidase, putative,…
Lus10022203	19.6667	534.667	189.599	344.887	18	451.667	48.3257	532.928	Signal transduction histidine kinase, hybrid-type, ethylene sensor	highly similar to ( 840) AT3G23150 | Symbols: ETR2 | ETR2 (ethylene response 2); ethylene binding / glycogen synthase kinase 3/ protein histidine kinase/ receptor | chr3:8255156-8257560 FORWARDmoderately similar to ( 455) ETR1_BRAOL Ethylene receptor (EC 2.7.13.3) - Brassica oleracea (Wild cabbage)highly similar to ( 698) loc_os04g08740 12004.m35115 protein ethylene receptor, putative, expressed …
Lus10041159	179.333	248	426.118	350.488	253.667	232.667	228.329	1002.35	Signal transduction histidine kinase, hybrid-type, ethylene sensor	highly similar to ( 794) AT3G23150 | Symbols: ETR2 | ETR2 (ethylene response 2); ethylene binding / glycogen synthase kinase 3/ protein histidine kinase/ receptor | chr3:8255156-8257560 FORWARDmoderately similar to ( 447) ETR1_BRAOL Ethylene receptor (EC 2.7.13.3) - Brassica oleracea (Wild cabbage)highly similar to ( 646) loc_os04g08740 12004.m35115 protein ethylene receptor, putative, expressed …
Lus10021196	1.33333	6.66667	6.62936	372.74	1.33333	5.33333	6.91656	1003.52	Integrase-type DNA-binding superfamily protein	very weakly similar to (84.7) AT1G04370 | Symbols: ATERF14 | ATERF14 (Ethylene-responsive element binding factor 14); DNA binding / transcription factor | chr1:1175177-1175578 FORWARDAP2 AP2 no original description
Lus10028678	28.6667	287	312.903	386.797	22.3333	364.667	403.788	2112.3	2-oxoglutarate (2OG) and Fe(II)-dependent oxygenase superfamily protein	moderately similar to ( 419) AT1G77330 | Symbols: | 1-aminocyclopropane-1-carboxylate oxidase, putative / ACC oxidase, putative | chr1:29063215-29064447 REVERSEmoderately similar to ( 309) ACCO1_MALDO 1-aminocyclopropane-1-carboxylate oxidase 1 (EC 1.14.17.4) (ACC oxidase 1) (Ethylene-forming enzyme) (EFE) (Protein AP4) (PAE12) - Malus domestica (Apple) (Malus sylvestris)moderately similar to ( 3…
Lus10041614	2.66667	37.6667	12.2067	406.036	9	36.3333	15.8977	264.613	Integrase-type DNA-binding superfamily protein	very weakly similar to ( 100) AT5G25190 | Symbols: | ethylene-responsive element-binding protein, putative | chr5:8707007-8707655 REVERSEvery weakly similar to (81.6) loc_os06g08340 12006.m05555 protein ethylene response factor 1, putative, expressedAP2 AP2 no original description
Lus10004245	2.66667	1	8.37767	427.829	4	1	14.8445	55.3633	2-oxoglutarate (2OG) and Fe(II)-dependent oxygenase superfamily protein	moderately similar to ( 208) AT3G19010 | Symbols: | oxidoreductase, 2OG-Fe(II) oxygenase family protein | chr3:6556567-6557862 REVERSEweakly similar to ( 102) G2OX2_PEA Gibberellin 2-beta-dioxygenase 2 (EC 1.14.11.13) (Gibberellin 2-beta-hydroxylase 2) (Gibberellin 2-oxidase 2) (GA 2-oxidase 2) - Pisum sativum (Garden pea)weakly similar to ( 183) loc_os03g42130 12003.m09271 protein gibberellin 20…
Lus10042549	310.667	303.333	843.781	438.581	304.667	320.667	712.282	370.786	Signal transduction histidine kinase, hybrid-type, ethylene sensor	highly similar to ( 899) AT3G04580 | Symbols: EIN4 | EIN4 (ETHYLENE INSENSITIVE 4); ethylene binding / glycogen synthase kinase 3/ protein histidine kinase/ receptor | chr3:1235576-1237965 REVERSEmoderately similar to ( 449) ETR1_MALDO Ethylene receptor (EC 2.7.13.3) - Malus domestica (Apple) (Malus sylvestris)highly similar to ( 660) loc_os04g08740 12004.m35115 protein ethylene receptor, putativ…
Lus10011829	26	26.6667	116.543	446.679	21.3333	29.6667	42.6237	741.964	ethylene response factor 1	weakly similar to ( 174) AT3G23240 | Symbols: ERF1, ATERF1 | ERF1 (ETHYLENE RESPONSE FACTOR 1); DNA binding / transcription activator/ transcription factor | chr3:8295705-8296361 FORWARDvery weakly similar to (88.6) ERF2_NICSY Ethylene-responsive transcription factor 2 (Ethylene-responsive element-binding factor 2) (EREBP-2) (NsERF2) - Nicotiana sylvestris (Wood tobacco)weakly similar to ( 122) l…
Lus10005149	1.33333	6	8.36538	450.363	1.66667	10	5.53122	298.064	cytokinin response factor 4	no original description
Lus10015252	26.3333	2800	26.5812	531.099	7.33333	2620	19.7502	3650.85	senescence-related gene 1	moderately similar to ( 341) AT1G17020 | Symbols: SRG1, ATSRG1 | SRG1 (SENESCENCE-RELATED GENE 1); oxidoreductase, acting on diphenols and related substances as donors, oxygen as acceptor / oxidoreductase, acting on paired donors, with incorporation or reduction of molecular oxygen, 2-oxoglutarate as one donor, and inc | chr1:5820258-5821741 FORWARDweakly similar to ( 190) LDOX_MALDO Leucoanthocy…
Lus10030185	5	1.33333	365.447	538.613	24	1	236.82	87.2634	2-oxoglutarate (2OG) and Fe(II)-dependent oxygenase superfamily protein	moderately similar to ( 427) AT4G10490 | Symbols: | oxidoreductase, 2OG-Fe(II) oxygenase family protein | chr4:6483900-6485179 FORWARDmoderately similar to ( 207) FL3H_MALDO Naringenin,2-oxoglutarate 3-dioxygenase (EC 1.14.11.9) (Flavonone-3-hydroxylase) (F3H) (FHT) - Malus domestica (Apple) (Malus sylvestris)moderately similar to ( 429) loc_os04g49210 12004.m09856 protein naringenin,2-oxoglutara…
Lus10039647	1.66667	75.3333	4.1893	540.803	3.66667	92.3333	11.7331	520.413	1-amino-cyclopropane-1-carboxylate synthase 8	highly similar to ( 729) AT4G37770 | Symbols: ACS8 | ACS8; 1-aminocyclopropane-1-carboxylate synthase | chr4:17752222-17753925 FORWARDhighly similar to ( 701) 1A1C_MALDO 1-aminocyclopropane-1-carboxylate synthase (EC 4.4.1.14) (ACC synthase) (S-adenosyl-L-methionine methylthioadenosine-lyase) - Malus domestica (Apple) (Malus sylvestris)highly similar to ( 612) loc_os03g51740 12003.m10154 protein …
Lus10031526	262.333	159.667	249.022	573.053	189.333	159	246.735	376.131	ethylene responsive element binding factor 3	very weakly similar to (81.3) AT1G28370 | Symbols: ERF11, ATERF11 | ERF11 (ERF DOMAIN PROTEIN 11); DNA binding / transcription factor/ transcription repressor | chr1:9956351-9956851 REVERSEAP2 AP2 no original description
Lus10011987	1	105.333	2.09205	588.9	1	106.667	6.57772	565.976	2-oxoglutarate (2OG) and Fe(II)-dependent oxygenase superfamily protein	moderately similar to ( 276) AT1G78550 | Symbols: | oxidoreductase, 2OG-Fe(II) oxygenase family protein | chr1:29545031-29546360 REVERSEweakly similar to ( 182) FLS_PETHY Flavonol synthase/flavanone 3-hydroxylase (EC 1.14.11.23) (EC 1.14.11.9) (FLS) - Petunia hybrida (Petunia)moderately similar to ( 230) loc_os10g40880 12010.m06856 protein flavonol synthase/flavanone 3-hydroxylase, putative, expr…
Lus10017521	24.3333	228.667	23.0539	657.859	27.3333	216.667	30.7483	771.814	1-aminocyclopropane-1-carboxylic acid (acc) synthase 6	highly similar to ( 655) AT4G11280 | Symbols: ACS6 | ACS6 (1-AMINOCYCLOPROPANE-1-CARBOXYLIC ACID (ACC) SYNTHASE 6); 1-aminocyclopropane-1-carboxylate synthase | chr4:6864168-6865922 FORWARDhighly similar to ( 714) 1A1C_SOYBN 1-aminocyclopropane-1-carboxylate synthase (EC 4.4.1.14) (ACC synthase) (S-adenosyl-L-methionine methylthioadenosine-lyase) - Glycine max (Soybean)highly similar to ( 609) lo…
Lus10018623	68.3333	247.333	44.6689	859.925	77.3333	232.333	95.9193	579.595	ethylene responsive element binding factor 4	AP2 AP2 no original description
Lus10000611	3.33333	63.6667	19.5429	882.991	5	73.3333	10.3831	568.243	2-oxoglutarate (2OG) and Fe(II)-dependent oxygenase superfamily protein	moderately similar to ( 231) AT1G06620 | Symbols: | 2-oxoglutarate-dependent dioxygenase, putative | chr1:2025618-2027094 FORWARDmoderately similar to ( 216) DV4H_CATRO Desacetoxyvindoline 4-hydroxylase (EC 1.14.11.20) - Catharanthus roseus (Rosy periwinkle) (Madagascar periwinkle)moderately similar to ( 206) loc_os08g30210 12008.m07023 protein 1-aminocyclopropane-1-carboxylate oxidase, putative,…
Lus10005343	2	30.3333	5.5798	902.681	1.66667	33.3333	6.56125	314.431	Integrase-type DNA-binding superfamily protein	weakly similar to ( 133) AT5G25190 | Symbols: | ethylene-responsive element-binding protein, putative | chr5:8707007-8707655 REVERSEvery weakly similar to (97.8) loc_os06g08340 12006.m05555 protein ethylene response factor 1, putative, expressedAP2 AP2 no original description
Lus10018400	320	288.333	343.909	933.139	336	316	321.809	1305.16	basic helix-loop-helix (bHLH) DNA-binding superfamily protein	weakly similar to ( 171) AT1G61660 | Symbols: | basic helix-loop-helix (bHLH) family protein | chr1:22754603-22756171 REVERSEweakly similar to ( 180) loc_os05g42180 12005.m08391 protein conserved hypothetical protein no original description
Lus10021943	378.333	397.333	475.334	987.973	367	428.667	377.024	525.905	2-oxoglutarate (2OG) and Fe(II)-dependent oxygenase superfamily protein	moderately similar to ( 437) AT1G06620 | Symbols: | 2-oxoglutarate-dependent dioxygenase, putative | chr1:2025618-2027094 FORWARDmoderately similar to ( 365) DV4H_CATRO Desacetoxyvindoline 4-hydroxylase (EC 1.14.11.20) - Catharanthus roseus (Rosy periwinkle) (Madagascar periwinkle)moderately similar to ( 342) loc_os03g48430 12003.m09851 protein 1-aminocyclopropane-1-carboxylate oxidase, putative,…
Lus10035329	560.333	425	687.404	1006.58	424.667	405.667	1126.85	811.453	ethylene responsive element binding factor 4	very weakly similar to (92.0) AT1G50640 | Symbols: ERF3, ATERF3 | ERF3 (ETHYLENE RESPONSIVE ELEMENT BINDING FACTOR 3); DNA binding / protein binding / transcription factor/ transcription repressor | chr1:18757602-18758279 REVERSEvery weakly similar to (95.1) ERF3_TOBAC Ethylene-responsive transcription factor 3 (Ethylene-responsive element-binding factor 3 homolog) (EREBP-5) (NtERF5) - Nicotiana …
Lus10011831	1	5	8.72047	1037.92	1	3.33333	4.14179	1854.97	Integrase-type DNA-binding superfamily protein	weakly similar to ( 101) AT1G04370 | Symbols: ATERF14 | ATERF14 (Ethylene-responsive element binding factor 14); DNA binding / transcription factor | chr1:1175177-1175578 FORWARDvery weakly similar to (84.0) loc_os08g44960 12008.m08467 protein ethylene-responsive transcription factor 15, putativeAP2 AP2 no original description
Lus10011986	1.66667	41	1.04777	1127.08	2.66667	61	6.21999	2264.5	senescence-related gene 1	moderately similar to ( 254) AT1G17020 | Symbols: SRG1, ATSRG1 | SRG1 (SENESCENCE-RELATED GENE 1); oxidoreductase, acting on diphenols and related substances as donors, oxygen as acceptor / oxidoreductase, acting on paired donors, with incorporation or reduction of molecular oxygen, 2-oxoglutarate as one donor, and inc | chr1:5820258-5821741 FORWARDweakly similar to ( 155) FLS_SOLTU Flavonol synt…
Lus10012963	1017.67	312.333	1758.03	1182.99	913	305.333	2241.98	1323.86	2-oxoglutarate (2OG) and Fe(II)-dependent oxygenase superfamily protein	highly similar to ( 503) AT1G35190 | Symbols: | oxidoreductase, 2OG-Fe(II) oxygenase family protein | chr1:12890544-12892632 FORWARDvery weakly similar to (99.8) FLS_PETHY Flavonol synthase/flavanone 3-hydroxylase (EC 1.14.11.23) (EC 1.14.11.9) (FLS) - Petunia hybrida (Petunia)highly similar to ( 529) loc_os01g09300 12001.m42896 protein iron ion binding protein, putative, expressed PcbC no origin…
Lus10029081	26.3333	62.3333	233.329	1190.7	20	67	188.149	1361.64	gibberellin 2-oxidase 8	moderately similar to ( 362) AT4G21200 | Symbols: ATGA2OX8, GA2OX8 | GA2OX8 (GIBBERELLIN 2-OXIDASE 8); gibberellin 2-beta-dioxygenase | chr4:11302751-11304032 FORWARDweakly similar to ( 149) GAO1B_WHEAT Gibberellin 20 oxidase 1-B (EC 1.14.11.-) (Gibberellin C-20 oxidase 1-B) (GA 20-oxidase 1-B) (Ta20ox1B) (TaGA20ox1-B) - Triticum aestivum (Wheat)moderately similar to ( 384) loc_os04g44150 12004.m…
Lus10022936	1	1	1.04777	1215.6	1	3.33333	1.03726	356.395	Integrase-type DNA-binding superfamily protein	AP2 AP2 no original description
Lus10013069	23.3333	41.3333	297.368	1223.68	23	38.6667	185.877	2110.94	gibberellin 2-oxidase 8	moderately similar to ( 363) AT4G21200 | Symbols: ATGA2OX8, GA2OX8 | GA2OX8 (GIBBERELLIN 2-OXIDASE 8); gibberellin 2-beta-dioxygenase | chr4:11302751-11304032 FORWARDweakly similar to ( 144) GAO1B_WHEAT Gibberellin 20 oxidase 1-B (EC 1.14.11.-) (Gibberellin C-20 oxidase 1-B) (GA 20-oxidase 1-B) (Ta20ox1B) (TaGA20ox1-B) - Triticum aestivum (Wheat)moderately similar to ( 381) loc_os04g44150 12004.m…
Lus10009272	357.667	876.333	814.306	1227.66	346.667	820	927.716	630.386	Adenine nucleotide alpha hydrolases-like superfamily protein	moderately similar to ( 219) AT1G09740 | Symbols: | ethylene-responsive protein, putative | chr1:3154603-3155834 FORWARDmoderately similar to ( 225) loc_os02g52314 12002.m10262 protein ER6 protein, putative, expressedUsp USP_Like no original description
Lus10022189	839.333	152	792.636	1325.41	678.333	193.667	821.103	1337.08	2-oxoglutarate (2OG) and Fe(II)-dependent oxygenase superfamily protein	moderately similar to ( 414) AT1G06620 | Symbols: | 2-oxoglutarate-dependent dioxygenase, putative | chr1:2025618-2027094 FORWARDmoderately similar to ( 398) DV4H_CATRO Desacetoxyvindoline 4-hydroxylase (EC 1.14.11.20) - Catharanthus roseus (Rosy periwinkle) (Madagascar periwinkle)moderately similar to ( 343) loc_os03g48430 12003.m09851 protein 1-aminocyclopropane-1-carboxylate oxidase, putative,…
Lus10011985	182.333	193.333	135.79	1409.91	162.333	176	145.208	827.795	senescence-related gene 1	moderately similar to ( 355) AT1G17020 | Symbols: SRG1, ATSRG1 | SRG1 (SENESCENCE-RELATED GENE 1); oxidoreductase, acting on diphenols and related substances as donors, oxygen as acceptor / oxidoreductase, acting on paired donors, with incorporation or reduction of molecular oxygen, 2-oxoglutarate as one donor, and inc | chr1:5820258-5821741 FORWARDweakly similar to ( 172) LDOX_MALDO Leucoanthocy…
Lus10029987	527	454.333	566.435	1554.1	452	469	994.249	1585.12	ethylene responsive element binding factor 4	very weakly similar to (87.8) AT1G28360 | Symbols: ERF12, ATERF12 | ERF12 (ERF DOMAIN PROTEIN 12); DNA binding / transcription factor/ transcription repressor | chr1:9951934-9952503 FORWARDvery weakly similar to (87.0) ERF3_TOBAC Ethylene-responsive transcription factor 3 (Ethylene-responsive element-binding factor 3 homolog) (EREBP-5) (NtERF5) - Nicotiana tabacum (Common tobacco)AP2 AP2 no origi…
Lus10007043	2256.33	1867	12313.8	1674.7	2100	1994.33	16316.3	1345.29	Adenine nucleotide alpha hydrolases-like superfamily protein	weakly similar to ( 199) AT2G47710 | Symbols: | universal stress protein (USP) family protein | chr2:19555045-19555956 REVERSEmoderately similar to ( 205) loc_os12g36640 12012.m07450 protein fiber protein Fb19, putative, expressed no original description
Lus10017701	67	27	109.172	1719.37	9.66667	24.6667	230.126	518.044	2-oxoglutarate (2OG) and Fe(II)-dependent oxygenase superfamily protein	moderately similar to ( 301) AT1G06620 | Symbols: | 2-oxoglutarate-dependent dioxygenase, putative | chr1:2025618-2027094 FORWARDmoderately similar to ( 281) DV4H_CATRO Desacetoxyvindoline 4-hydroxylase (EC 1.14.11.20) - Catharanthus roseus (Rosy periwinkle) (Madagascar periwinkle)moderately similar to ( 245) loc_os03g48430 12003.m09851 protein 1-aminocyclopropane-1-carboxylate oxidase, putative,…
Lus10031530	66.3333	386.333	63.5154	1783.36	41.6667	592.333	17.6893	1544.91	ethylene-forming enzyme	moderately similar to ( 451) AT1G05010 | Symbols: EFE, ACO4, EAT1 | EFE (ETHYLENE-FORMING ENZYME); 1-aminocyclopropane-1-carboxylate oxidase | chr1:1431419-1432695 REVERSEmoderately similar to ( 463) ACCO3_PETHY 1-aminocyclopropane-1-carboxylate oxidase 3 (EC 1.14.17.4) (ACC oxidase 3) (Ethylene-forming enzyme) (EFE) - Petunia hybrida (Petunia)moderately similar to ( 418) loc_os09g27820 12009.m05…
Lus10022009	423.333	465	1565.96	1804.84	419.333	477.333	1402.02	1084.65	Signal transduction histidine kinase, hybrid-type, ethylene sensor	highly similar to ( 906) AT3G04580 | Symbols: EIN4 | EIN4 (ETHYLENE INSENSITIVE 4); ethylene binding / glycogen synthase kinase 3/ protein histidine kinase/ receptor | chr3:1235576-1237965 REVERSEmoderately similar to ( 456) ETR1_MALDO Ethylene receptor (EC 2.7.13.3) - Malus domestica (Apple) (Malus sylvestris)highly similar to ( 671) loc_os04g08740 12004.m35115 protein ethylene receptor, putativ…
Lus10013686	1482.33	1392.33	2249.61	1844.12	1310.67	1439.33	3937.31	1280.53	multiprotein bridging factor 1B	weakly similar to ( 177) AT3G58680 | Symbols: MBF1B, ATMBF1B | MBF1B (MULTIPROTEIN BRIDGING FACTOR 1B); DNA binding / transcription coactivator | chr3:21707367-21708625 FORWARDweakly similar to ( 168) loc_os08g27850 12008.m080145 protein endothelial differentiation-related factor 1, putative, expressed no original description
Lus10027585	1051	107.667	11247.4	1844.84	763.333	116	12133.5	2773.13	2-oxoglutarate (2OG) and Fe(II)-dependent oxygenase superfamily protein	moderately similar to ( 425) AT1G06620 | Symbols: | 2-oxoglutarate-dependent dioxygenase, putative | chr1:2025618-2027094 FORWARDmoderately similar to ( 370) DV4H_CATRO Desacetoxyvindoline 4-hydroxylase (EC 1.14.11.20) - Catharanthus roseus (Rosy periwinkle) (Madagascar periwinkle)moderately similar to ( 334) loc_os03g48430 12003.m09851 protein 1-aminocyclopropane-1-carboxylate oxidase, putative,…
Lus10004387	407	194	367.354	1895.95	259	183.333	417.471	2445.42	2-oxoglutarate (2OG) and Fe(II)-dependent oxygenase superfamily protein	moderately similar to ( 490) AT3G11180 | Symbols: | oxidoreductase, 2OG-Fe(II) oxygenase family protein | chr3:3504249-3506688 FORWARDmoderately similar to ( 230) LDOX_MALDO Leucoanthocyanidin dioxygenase (EC 1.14.11.19) (LDOX) (Leucocyanidin oxygenase) (Leucoanthocyanidin hydroxylase) (Anthocyanidin synthase) - Malus domestica (Apple) (Malus sylvestris)moderately similar to ( 432) loc_os01g61610…
Lus10015296	56.3333	50	218.175	1999.4	52	55	314.249	2339.31	ethylene responsive element binding factor 1	no original description
Lus10007818	2452.67	352.667	51485	2083.71	2977.67	408.667	48913.1	1004.9	2-oxoglutarate (2OG) and Fe(II)-dependent oxygenase superfamily protein	moderately similar to ( 261) AT1G03400 | Symbols: | 2-oxoglutarate-dependent dioxygenase, putative | chr1:842895-844158 REVERSEmoderately similar to ( 234) DV4H_CATRO Desacetoxyvindoline 4-hydroxylase (EC 1.14.11.20) - Catharanthus roseus (Rosy periwinkle) (Madagascar periwinkle)moderately similar to ( 261) loc_os06g14400 12006.m06155 protein 1-aminocyclopropane-1-carboxylate oxidase, putative, e…
Lus10007613	439.667	341.667	1211.37	2147.81	424	430.667	898.01	4265.98	basic helix-loop-helix (bHLH) DNA-binding superfamily protein	weakly similar to ( 162) AT1G61660 | Symbols: | basic helix-loop-helix (bHLH) family protein | chr1:22754603-22756171 REVERSEweakly similar to ( 181) loc_os05g42180 12005.m08391 protein conserved hypothetical protein no original description
Lus10022192	194.333	655	4651.33	2341.42	216.667	714	1617.71	6892.39	2-oxoglutarate (2OG) and Fe(II)-dependent oxygenase superfamily protein	moderately similar to ( 368) AT1G06620 | Symbols: | 2-oxoglutarate-dependent dioxygenase, putative | chr1:2025618-2027094 FORWARDmoderately similar to ( 303) DV4H_CATRO Desacetoxyvindoline 4-hydroxylase (EC 1.14.11.20) - Catharanthus roseus (Rosy periwinkle) (Madagascar periwinkle)moderately similar to ( 270) loc_os04g10350 12004.m06287 protein 1-aminocyclopropane-1-carboxylate oxidase, putative,…
Lus10029318	1	59.6667	1.04777	2409.23	1	50	1.38036	1264.49	ethylene-responsive element binding factor 13	weakly similar to ( 130) AT2G44840 | Symbols: ATERF13, EREBP, ERF13 | ERF13 (ETHYLENE-RESPONSIVE ELEMENT BINDING FACTOR 13); DNA binding / transcription factor | chr2:18495440-18496120 FORWARDweakly similar to ( 120) ERF1_TOBAC Ethylene-responsive transcription factor 1 (Ethylene-responsive element-binding factor 1) (EREBP-1) (NtERF1) - Nicotiana tabacum (Common tobacco)very weakly similar to (97…
Lus10039857	261	499.333	482.637	2670.81	240	482	906.088	1691.58	erf domain protein 9	very weakly similar to (95.5) AT5G44210 | Symbols: ERF9, ATERF9, ATERF-9 | ERF9 (ERF DOMAIN PROTEIN 9); DNA binding / transcription factor/ transcription repressor | chr5:17806742-17807344 FORWARDvery weakly similar to (94.4) ERF4_NICSY Ethylene-responsive transcription factor 4 (Ethylene-responsive element-binding factor 4 homolog) (EREBP-3) (NsERF3) - Nicotiana sylvestris (Wood tobacco)AP2 AP2 …
Lus10042557	1.33333	41.6667	4.5356	2747.37	1.66667	33.3333	2.76625	1681.83	ethylene response factor 1	weakly similar to ( 122) AT3G23240 | Symbols: ERF1, ATERF1 | ERF1 (ETHYLENE RESPONSE FACTOR 1); DNA binding / transcription activator/ transcription factor | chr3:8295705-8296361 FORWARDvery weakly similar to (80.9) ERF5_TOBAC Ethylene-responsive transcription factor 5 (Ethylene-responsive element-binding factor 5 homolog) (EREBP-4) (NtERF4) - Nicotiana tabacum (Common tobacco)weakly similar to (…
Lus10037292	362.667	400.333	797.138	2919.22	335.667	360.667	915.017	2161.69	2-oxoglutarate (2OG) and Fe(II)-dependent oxygenase superfamily protein	moderately similar to ( 354) AT4G16330 | Symbols: | oxidoreductase/ oxidoreductase, acting on paired donors, with incorporation or reduction of molecular oxygen, 2-oxoglutarate as one donor, and incorporation of one atom each of oxygen into both donors | chr4:9226298-9227235 REVERSEmoderately similar to ( 220) FLS_PETHY Flavonol synthase/flavanone 3-hydroxylase (EC 1.14.11.23) (EC 1.14.11.9) (FLS…
Lus10023311	121	156.667	80.0838	2935.14	118.333	170.667	51.1361	2133	gibberellin 2-oxidase	moderately similar to ( 377) AT1G30040 | Symbols: ATGA2OX2 | ATGA2OX2 (GIBBERELLIN 2-OXIDASE); gibberellin 2-beta-dioxygenase | chr1:10537769-10538781 FORWARDmoderately similar to ( 370) G2OX1_PEA Gibberellin 2-beta-dioxygenase 1 (EC 1.14.11.13) (Gibberellin 2-beta-hydroxylase 1) (Gibberellin 2-oxidase 1) (GA 2-oxidase 1) (Protein SLENDER) - Pisum sativum (Garden pea)moderately similar to ( 333) …
Lus10015415	1104	3425	121.32	3006.36	1443.33	3452.33	194.44	1547.35	erf domain protein 9	very weakly similar to (97.4) AT5G44210 | Symbols: ERF9, ATERF9, ATERF-9 | ERF9 (ERF DOMAIN PROTEIN 9); DNA binding / transcription factor/ transcription repressor | chr5:17806742-17807344 FORWARDvery weakly similar to (91.3) ERF4_NICSY Ethylene-responsive transcription factor 4 (Ethylene-responsive element-binding factor 4 homolog) (EREBP-3) (NsERF3) - Nicotiana sylvestris (Wood tobacco)very wea…
Lus10022191	150.333	865	3621.56	3197.72	215.667	1055.67	1415.05	13878	2-oxoglutarate (2OG) and Fe(II)-dependent oxygenase superfamily protein	moderately similar to ( 447) AT1G06620 | Symbols: | 2-oxoglutarate-dependent dioxygenase, putative | chr1:2025618-2027094 FORWARDmoderately similar to ( 360) DV4H_CATRO Desacetoxyvindoline 4-hydroxylase (EC 1.14.11.20) - Catharanthus roseus (Rosy periwinkle) (Madagascar periwinkle)moderately similar to ( 328) loc_os03g48430 12003.m09851 protein 1-aminocyclopropane-1-carboxylate oxidase, putative,…
Lus10015573	56.3333	217.667	401.499	3308.78	80	272.667	467.723	2946.18	2-oxoglutarate (2OG) and Fe(II)-dependent oxygenase superfamily protein	moderately similar to ( 466) AT5G24530 | Symbols: DMR6 | DMR6 (DOWNY MILDEW RESISTANT 6); oxidoreductase/ oxidoreductase, acting on paired donors, with incorporation or reduction of molecular oxygen, 2-oxoglutarate as one donor, and incorporation of one atom each of oxygen into both donors | chr5:8378964-8383154 FORWARDweakly similar to ( 192) FL3H_DIACA Naringenin,2-oxoglutarate 3-dioxygenase (E…
Lus10022193	150	246.333	615.816	3366	126.667	272.333	507.152	13599.3	2-oxoglutarate (2OG) and Fe(II)-dependent oxygenase superfamily protein	moderately similar to ( 419) AT1G06620 | Symbols: | 2-oxoglutarate-dependent dioxygenase, putative | chr1:2025618-2027094 FORWARDmoderately similar to ( 348) DV4H_CATRO Desacetoxyvindoline 4-hydroxylase (EC 1.14.11.20) - Catharanthus roseus (Rosy periwinkle) (Madagascar periwinkle)moderately similar to ( 308) loc_os03g48430 12003.m09851 protein 1-aminocyclopropane-1-carboxylate oxidase, putative,…
Lus10033664	194.333	255.667	715.565	4131.08	144.667	221	1198.22	2826.52	ethylene responsive element binding factor 4	very weakly similar to (83.6) AT5G44210 | Symbols: ERF9, ATERF9, ATERF-9 | ERF9 (ERF DOMAIN PROTEIN 9); DNA binding / transcription factor/ transcription repressor | chr5:17806742-17807344 FORWARDvery weakly similar to (87.0) ERF4_TOBAC Ethylene-responsive transcription factor 4 (Ethylene-responsive element-binding factor 4 homolog) (EREBP-3) (NtERF3) - Nicotiana tabacum (Common tobacco)AP2 AP2 n…
Lus10022015	1.33333	32.3333	7.3351	4328.97	1.33333	23.6667	4.51711	4544.3	ethylene response factor 1	weakly similar to ( 131) AT3G23240 | Symbols: ERF1, ATERF1 | ERF1 (ETHYLENE RESPONSE FACTOR 1); DNA binding / transcription activator/ transcription factor | chr3:8295705-8296361 FORWARDvery weakly similar to (82.8) ERF5_TOBAC Ethylene-responsive transcription factor 5 (Ethylene-responsive element-binding factor 5 homolog) (EREBP-4) (NtERF4) - Nicotiana tabacum (Common tobacco)weakly similar to (…
Lus10029992	13147.7	2575.33	43828.4	4773.08	12059.3	2110.67	20861.7	5265.84	ethylene-forming enzyme	moderately similar to ( 448) AT1G05010 | Symbols: EFE, ACO4, EAT1 | EFE (ETHYLENE-FORMING ENZYME); 1-aminocyclopropane-1-carboxylate oxidase | chr1:1431419-1432695 REVERSEmoderately similar to ( 480) ACCO3_PETHY 1-aminocyclopropane-1-carboxylate oxidase 3 (EC 1.14.17.4) (ACC oxidase 3) (Ethylene-forming enzyme) (EFE) - Petunia hybrida (Petunia)moderately similar to ( 415) loc_os09g27820 12009.m05…
Lus10007910	7	64	1372.44	4779.45	7.33333	103	1634.27	6516.69	ACC synthase 1	highly similar to ( 664) AT3G61510 | Symbols: ACS1, AT-ACS1 | ACS1 (ACC SYNTHASE 1); 1-aminocyclopropane-1-carboxylate synthase | chr3:22763495-22765730 REVERSEhighly similar to ( 687) 1A1C_TOBAC 1-aminocyclopropane-1-carboxylate synthase (EC 4.4.1.14) (ACC synthase) (S-adenosyl-L-methionine methylthioadenosine-lyase) - Nicotiana tabacum (Common tobacco)highly similar to ( 605) loc_os04g48850 120…
Lus10024883	1	3.33333	1.74395	5283.78	1	5.33333	1.38646	2559.89	Integrase-type DNA-binding superfamily protein	AP2 AP2 no original description
Lus10032301	84	128.667	299.114	5417.82	84.3333	250.667	276.067	2492.56	1-amino-cyclopropane-1-carboxylate synthase 2	highly similar to ( 619) AT4G11280 | Symbols: ACS6 | ACS6 (1-AMINOCYCLOPROPANE-1-CARBOXYLIC ACID (ACC) SYNTHASE 6); 1-aminocyclopropane-1-carboxylate synthase | chr4:6864168-6865922 FORWARDhighly similar to ( 661) 1A1C_SOYBN 1-aminocyclopropane-1-carboxylate synthase (EC 4.4.1.14) (ACC synthase) (S-adenosyl-L-methionine methylthioadenosine-lyase) - Glycine max (Soybean)highly similar to ( 601) lo…
Lus10007841	20.6667	62	363.515	5559.26	18.3333	54.6667	470.068	2707.8	ethylene responsive element binding factor 5	very weakly similar to ( 100) AT5G51190 | Symbols: | AP2 domain-containing transcription factor, putative | chr5:20800708-20801373 REVERSEvery weakly similar to (94.7) ERF5_NICSY Ethylene-responsive transcription factor 5 (Ethylene-responsive element-binding factor 5 homolog) (EREBP-4) (NsERF4) - Nicotiana sylvestris (Wood tobacco)very weakly similar to (97.4) loc_os10g41330 12010.m06897 protein …
Lus10024673	65.3333	135.333	46.3837	5629.58	95.6667	182.333	54.6722	3279.14	1-amino-cyclopropane-1-carboxylate synthase 2	highly similar to ( 621) AT4G11280 | Symbols: ACS6 | ACS6 (1-AMINOCYCLOPROPANE-1-CARBOXYLIC ACID (ACC) SYNTHASE 6); 1-aminocyclopropane-1-carboxylate synthase | chr4:6864168-6865922 FORWARDhighly similar to ( 662) 1A1C_SOYBN 1-aminocyclopropane-1-carboxylate synthase (EC 4.4.1.14) (ACC synthase) (S-adenosyl-L-methionine methylthioadenosine-lyase) - Glycine max (Soybean)highly similar to ( 604) lo…
Lus10030261	1	5.33333	1.39586	5648.86	1	9.33333	3.79684	1534.97	ethylene-responsive element binding factor 13	weakly similar to ( 114) AT2G44840 | Symbols: ATERF13, EREBP, ERF13 | ERF13 (ETHYLENE-RESPONSIVE ELEMENT BINDING FACTOR 13); DNA binding / transcription factor | chr2:18495440-18496120 FORWARDweakly similar to ( 106) ERF1_TOBAC Ethylene-responsive transcription factor 1 (Ethylene-responsive element-binding factor 1) (EREBP-1) (NtERF1) - Nicotiana tabacum (Common tobacco)very weakly similar to (96…
Lus10029331	1	113	2.4427	5844.5	1	155.333	5.51973	7145.86	ethylene-responsive element binding factor 13	weakly similar to ( 132) AT2G44840 | Symbols: ATERF13, EREBP, ERF13 | ERF13 (ETHYLENE-RESPONSIVE ELEMENT BINDING FACTOR 13); DNA binding / transcription factor | chr2:18495440-18496120 FORWARDweakly similar to ( 116) ERF1_TOBAC Ethylene-responsive transcription factor 1 (Ethylene-responsive element-binding factor 1) (EREBP-1) (NtERF1) - Nicotiana tabacum (Common tobacco)weakly similar to ( 101) l…
Lus10035334	4180.67	1630.33	9245.79	6143.82	4260	984.667	4651.53	1700.83	ethylene-forming enzyme	moderately similar to ( 447) AT1G05010 | Symbols: EFE, ACO4, EAT1 | EFE (ETHYLENE-FORMING ENZYME); 1-aminocyclopropane-1-carboxylate oxidase | chr1:1431419-1432695 REVERSEmoderately similar to ( 473) ACCO3_PETHY 1-aminocyclopropane-1-carboxylate oxidase 3 (EC 1.14.17.4) (ACC oxidase 3) (Ethylene-forming enzyme) (EFE) - Petunia hybrida (Petunia)moderately similar to ( 416) loc_os09g27820 12009.m05…
Lus10026173	21.3333	222.333	76.4921	6678.29	6.66667	282.333	58.7672	3438.67	senescence-related gene 1	moderately similar to ( 390) AT1G17020 | Symbols: SRG1, ATSRG1 | SRG1 (SENESCENCE-RELATED GENE 1); oxidoreductase, acting on diphenols and related substances as donors, oxygen as acceptor / oxidoreductase, acting on paired donors, with incorporation or reduction of molecular oxygen, 2-oxoglutarate as one donor, and inc | chr1:5820258-5821741 FORWARDweakly similar to ( 174) LDOX_MALDO Leucoanthocy…
Lus10022195	173.667	346	3749.49	6928.88	211	343	3613.56	5444.99	2-oxoglutarate (2OG) and Fe(II)-dependent oxygenase superfamily protein	moderately similar to ( 427) AT1G06620 | Symbols: | 2-oxoglutarate-dependent dioxygenase, putative | chr1:2025618-2027094 FORWARDmoderately similar to ( 369) DV4H_CATRO Desacetoxyvindoline 4-hydroxylase (EC 1.14.11.20) - Catharanthus roseus (Rosy periwinkle) (Madagascar periwinkle)moderately similar to ( 336) loc_os03g48430 12003.m09851 protein 1-aminocyclopropane-1-carboxylate oxidase, putative,…
Lus10001109	237.333	552.667	3.84299	6984.45	52	463	5.86653	3214.58	2-oxoglutarate (2OG) and Fe(II)-dependent oxygenase superfamily protein	moderately similar to ( 375) AT1G06620 | Symbols: | 2-oxoglutarate-dependent dioxygenase, putative | chr1:2025618-2027094 FORWARDmoderately similar to ( 346) DV4H_CATRO Desacetoxyvindoline 4-hydroxylase (EC 1.14.11.20) - Catharanthus roseus (Rosy periwinkle) (Madagascar periwinkle)moderately similar to ( 306) loc_os03g48430 12003.m09851 protein 1-aminocyclopropane-1-carboxylate oxidase, putative,…
Lus10023890	1.33333	69	1.39672	8670.97	1	53.6667	1.38036	4744.8	2-oxoglutarate (2OG) and Fe(II)-dependent oxygenase superfamily protein	moderately similar to ( 473) AT2G36690 | Symbols: | oxidoreductase, 2OG-Fe(II) oxygenase family protein | chr2:15379930-15381987 FORWARDweakly similar to ( 169) FL3H_DIACA Naringenin,2-oxoglutarate 3-dioxygenase (EC 1.14.11.9) (Flavonone-3-hydroxylase) (F3H) (FHT) - Dianthus caryophyllus (Carnation) (Clove pink)moderately similar to ( 367) loc_os08g44590 12008.m08432 protein gibberellin 20 oxidas…
Lus10032499	3713.67	3807	5899.15	9030.32	5373.67	4264.33	4659.8	3539.56	Integrase-type DNA-binding superfamily protein	weakly similar to ( 158) AT5G51190 | Symbols: | AP2 domain-containing transcription factor, putative | chr5:20800708-20801373 REVERSEweakly similar to ( 155) ERF5_TOBAC Ethylene-responsive transcription factor 5 (Ethylene-responsive element-binding factor 5 homolog) (EREBP-4) (NtERF4) - Nicotiana tabacum (Common tobacco)weakly similar to ( 115) loc_os10g41330 12010.m06897 protein ethylene-respons…
Lus10036396	3.33333	14.6667	301.059	9194.37	3.33333	29	264.55	9901.92	ACC synthase 1	highly similar to ( 646) AT3G61510 | Symbols: ACS1, AT-ACS1 | ACS1 (ACC SYNTHASE 1); 1-aminocyclopropane-1-carboxylate synthase | chr3:22763495-22765730 REVERSEhighly similar to ( 654) 1A1C_TOBAC 1-aminocyclopropane-1-carboxylate synthase (EC 4.4.1.14) (ACC synthase) (S-adenosyl-L-methionine methylthioadenosine-lyase) - Nicotiana tabacum (Common tobacco)highly similar to ( 593) loc_os04g48850 120…
Lus10005037	3	3	114.019	11316.1	2.66667	3	163.942	12257.6	2-oxoglutarate (2OG) and Fe(II)-dependent oxygenase superfamily protein	moderately similar to ( 466) AT3G11180 | Symbols: | oxidoreductase, 2OG-Fe(II) oxygenase family protein | chr3:3504249-3506688 FORWARDmoderately similar to ( 233) LDOX_MALDO Leucoanthocyanidin dioxygenase (EC 1.14.11.19) (LDOX) (Leucocyanidin oxygenase) (Leucoanthocyanidin hydroxylase) (Anthocyanidin synthase) - Malus domestica (Apple) (Malus sylvestris)moderately similar to ( 405) loc_os01g61610…
Lus10015153	25.3333	462	37.0281	12229.5	50.6667	589.667	32.7314	19685.2	ethylene-forming enzyme	moderately similar to ( 453) AT1G05010 | Symbols: EFE, ACO4, EAT1 | EFE (ETHYLENE-FORMING ENZYME); 1-aminocyclopropane-1-carboxylate oxidase | chr1:1431419-1432695 REVERSEmoderately similar to ( 468) ACCO_ACTCH 1-aminocyclopropane-1-carboxylate oxidase (EC 1.14.17.4) (ACC oxidase) (Ethylene-forming enzyme) (EFE) - Actinidia chinensis (Kiwi) (Yangtao)moderately similar to ( 423) loc_os09g27820 120…
Lus10016211	1	112	1.04777	12562.1	1	110.333	1.03726	4672.93	ethylene-responsive element binding factor 13	weakly similar to ( 139) AT2G44840 | Symbols: ATERF13, EREBP, ERF13 | ERF13 (ETHYLENE-RESPONSIVE ELEMENT BINDING FACTOR 13); DNA binding / transcription factor | chr2:18495440-18496120 FORWARDweakly similar to ( 124) ERF2_TOBAC Ethylene-responsive transcription factor 2 (Ethylene-responsive element-binding factor 2) (EREBP-2) (NtERF2) - Nicotiana tabacum (Common tobacco)weakly similar to ( 104) l…
Lus10014398	23.3333	405.667	78.9373	12643.9	30	347.333	60.2049	6227.11	2-oxoglutarate (2OG) and Fe(II)-dependent oxygenase superfamily protein	moderately similar to ( 467) AT2G36690 | Symbols: | oxidoreductase, 2OG-Fe(II) oxygenase family protein | chr2:15379930-15381987 FORWARDweakly similar to ( 170) FLS_PETHY Flavonol synthase/flavanone 3-hydroxylase (EC 1.14.11.23) (EC 1.14.11.9) (FLS) - Petunia hybrida (Petunia)moderately similar to ( 369) loc_os08g44590 12008.m08432 protein gibberellin 20 oxidase 2, putative, expressed PcbC 2OG-Fe…
Lus10001108	257.667	1739.67	37.7666	13367.6	129	1490.67	24.2238	9113.57	2-oxoglutarate (2OG) and Fe(II)-dependent oxygenase superfamily protein	moderately similar to ( 343) AT1G06620 | Symbols: | 2-oxoglutarate-dependent dioxygenase, putative | chr1:2025618-2027094 FORWARDmoderately similar to ( 327) DV4H_CATRO Desacetoxyvindoline 4-hydroxylase (EC 1.14.11.20) - Catharanthus roseus (Rosy periwinkle) (Madagascar periwinkle)moderately similar to ( 270) loc_os04g10350 12004.m06287 protein 1-aminocyclopropane-1-carboxylate oxidase, putative,…
Lus10028679	50	242	1736.92	14489	69.3333	334.667	2606.08	15391.6	Integrase-type DNA-binding superfamily protein	AP2 AP2 no original description
Lus10004752	52	91	241.009	16013.8	60	83.3333	403.169	7075.97	Integrase-type DNA-binding superfamily protein	very weakly similar to (90.9) AT5G07580 | Symbols: | DNA binding / transcription factor | chr5:2399525-2400349 FORWARDvery weakly similar to (84.7) ERF5_NICSY Ethylene-responsive transcription factor 5 (Ethylene-responsive element-binding factor 5 homolog) (EREBP-4) (NsERF4) - Nicotiana sylvestris (Wood tobacco)very weakly similar to (90.5) loc_os10g41330 12010.m06897 protein ethylene-responsive …
Lus10022292	184.667	594.667	324.218	16406.8	195	568	244.746	9753.49	senescence-related gene 1	moderately similar to ( 403) AT4G25300 | Symbols: | oxidoreductase, 2OG-Fe(II) oxygenase family protein | chr4:12945780-12946642 FORWARDweakly similar to ( 188) FLS_PETHY Flavonol synthase/flavanone 3-hydroxylase (EC 1.14.11.23) (EC 1.14.11.9) (FLS) - Petunia hybrida (Petunia)moderately similar to ( 313) loc_os10g41020 12010.m06867 protein flavonol synthase/flavanone 3-hydroxylase, putative, expr…
Lus10006579	1.33333	1.33333	85.4277	18460.8	1	3	59.5924	8352.57	ethylene response factor 1	weakly similar to ( 148) AT3G23240 | Symbols: ERF1, ATERF1 | ERF1 (ETHYLENE RESPONSE FACTOR 1); DNA binding / transcription activator/ transcription factor | chr3:8295705-8296361 FORWARDweakly similar to ( 117) loc_os03g64260 12003.m11287 protein ethylene responsive element binding protein, putative, expressedAP2 AP2 no original description
Lus10021776	358	118.667	972.066	24512.7	272.667	137.667	541.071	21579.3	multiprotein bridging factor 1C	weakly similar to ( 153) AT3G24500 | Symbols: MBF1C, ATMBF1C | MBF1C (MULTIPROTEIN BRIDGING FACTOR 1C); DNA binding / transcription coactivator/ transcription factor | chr3:8918755-8919201 FORWARDweakly similar to ( 117) loc_os06g39240 12006.m091727 protein endothelial differentiation-related factor 1, putative, expressed no original description
Lus10014655	1	6.66667	11.5106	24970.7	1.33333	5.33333	6.93174	15865.1	ethylene response factor 1	weakly similar to ( 134) AT3G23240 | Symbols: ERF1, ATERF1 | ERF1 (ETHYLENE RESPONSE FACTOR 1); DNA binding / transcription activator/ transcription factor | chr3:8295705-8296361 FORWARDweakly similar to ( 104) loc_os03g64260 12003.m11287 protein ethylene responsive element binding protein, putative, expressedAP2 AP2 no original description
Lus10029333	1	38.3333	3.14417	27521.9	1.33333	52	12.4252	9224.98	ethylene-responsive element binding factor 13	weakly similar to ( 134) AT2G44840 | Symbols: ATERF13, EREBP, ERF13 | ERF13 (ETHYLENE-RESPONSIVE ELEMENT BINDING FACTOR 13); DNA binding / transcription factor | chr2:18495440-18496120 FORWARDweakly similar to ( 129) ERF2_NICSY Ethylene-responsive transcription factor 2 (Ethylene-responsive element-binding factor 2) (EREBP-2) (NsERF2) - Nicotiana sylvestris (Wood tobacco)weakly similar to ( 104) …
Lus10022935	889	759.667	176.873	28470.5	893.667	800	110.3	29304.6	ethylene-responsive element binding factor 15	weakly similar to ( 110) AT1G06160 | Symbols: ORA59 | ORA59 (OCTADECANOID-RESPONSIVE ARABIDOPSIS AP2/ERF 59); DNA binding / transcription activator/ transcription factor | chr1:1883046-1883780 FORWARDweakly similar to ( 105) loc_os03g64260 12003.m11287 protein ethylene responsive element binding protein, putative, expressedAP2 AP2 no original description
Lus10040165	199.667	284	214.309	33539.5	270	442	322.108	13429.1	ethylene responsive element binding factor 1	moderately similar to ( 211) AT4G17500 | Symbols: ATERF-1 | ATERF-1 (ETHYLENE RESPONSIVE ELEMENT BINDING FACTOR 1); DNA binding / transcription activator/ transcription factor | chr4:9759405-9760211 FORWARDweakly similar to ( 173) ERF2_NICSY Ethylene-responsive transcription factor 2 (Ethylene-responsive element-binding factor 2) (EREBP-2) (NsERF2) - Nicotiana sylvestris (Wood tobacco)weakly simi…
Lus10027807	1.66667	12	37.6845	39766.4	1.33333	23.3333	38.3774	46226	2-oxoglutarate (2OG) and Fe(II)-dependent oxygenase superfamily protein	moderately similar to ( 324) AT3G11180 | Symbols: | oxidoreductase, 2OG-Fe(II) oxygenase family protein | chr3:3504249-3506688 FORWARDweakly similar to ( 169) ACCO1_ORYSA 1-aminocyclopropane-1-carboxylate oxidase 1 (EC 1.14.17.4) (ACC oxidase 1) (Ethylene-forming enzyme) (EFE) - Oryza sativa (Rice)moderately similar to ( 281) loc_os05g03640 12005.m04898 protein flavonol synthase/flavanone 3-hydro…
Lus10004808	18.6667	80.6667	239.729	74222.2	7	126.667	237.956	57649.3	2-oxoglutarate (2OG) and Fe(II)-dependent oxygenase superfamily protein	moderately similar to ( 456) AT5G05600 | Symbols: | oxidoreductase, 2OG-Fe(II) oxygenase family protein | chr5:1672266-1674602 FORWARDmoderately similar to ( 236) LDOX_MALDO Leucoanthocyanidin dioxygenase (EC 1.14.11.19) (LDOX) (Leucocyanidin oxygenase) (Leucoanthocyanidin hydroxylase) (Anthocyanidin synthase) - Malus domestica (Apple) (Malus sylvestris)moderately similar to ( 404) loc_os01g61610…
Lus10004368	442	1002.67	1796.83	78664.3	452.667	930.333	1549.51	26794.3	ethylene responsive element binding factor 1	moderately similar to ( 225) AT4G17500 | Symbols: ATERF-1 | ATERF-1 (ETHYLENE RESPONSIVE ELEMENT BINDING FACTOR 1); DNA binding / transcription activator/ transcription factor | chr4:9759405-9760211 FORWARDweakly similar to ( 185) ERF2_NICSY Ethylene-responsive transcription factor 2 (Ethylene-responsive element-binding factor 2) (EREBP-2) (NsERF2) - Nicotiana sylvestris (Wood tobacco)weakly simi…
Lus10027586	114.667	124.333	1030.87	100111	100.667	127	996.131	42067.1	2-oxoglutarate (2OG) and Fe(II)-dependent oxygenase superfamily protein	moderately similar to ( 414) AT1G06620 | Symbols: | 2-oxoglutarate-dependent dioxygenase, putative | chr1:2025618-2027094 FORWARDmoderately similar to ( 341) DV4H_CATRO Desacetoxyvindoline 4-hydroxylase (EC 1.14.11.20) - Catharanthus roseus (Rosy periwinkle) (Madagascar periwinkle)moderately similar to ( 306) loc_os03g48430 12003.m09851 protein 1-aminocyclopropane-1-carboxylate oxidase, putative,…
Lus10034592	550.667	212	1288.84	206333	269.667	160.667	1025.21	89912	multiprotein bridging factor 1C	weakly similar to ( 153) AT3G24500 | Symbols: MBF1C, ATMBF1C | MBF1C (MULTIPROTEIN BRIDGING FACTOR 1C); DNA binding / transcription coactivator/ transcription factor | chr3:8918755-8919201 FORWARDweakly similar to ( 119) loc_os06g39240 12006.m091727 protein endothelial differentiation-related factor 1, putative, expressed no original description
