# Supplementary material for: Comprehensive Analysis of Differentially Expressed Genes and Epigenetic Modification-Related Expression Variation Induced by Saline Stress at Seedling Stage in Fiber and Oil Flax, Linum usitatissimum L
Source: Plants (Basel). 2022 Aug 5;11(15):2053. doi: 10.3390/plants11152053 (PMC9370232; doi:10.3390/plants11152053)
Supplement: Supplementary file 1 [file plants-11-02053-s001.zip › Supplementary Table S4.xlsx]

## Sheet: MYB
	M−Fn−L	M−Fn−R	S−Fn−L	S−Fn−R	M−Ly−L	M−Ly−R	S−Ly−L	S−Ly−R	annotation	Mapman
Lus10042522	1.66667	2.33333	9.42202	1.12174	2.33333	1	24.1719	7.2272	myb domain protein 113	weakly similar to ( 178) AT1G66370 .g Symbols: MYB113, AtMYB113 .g MYB113 (myb domain protein 113); DNA binding / transcription factor .g chr1:24753634-24754604 FORWARDweakly similar to ( 147) MYB1_HORVU Myb-related protein Hv1 - Hordeum vulgare (Barley)weakly similar to ( 145) loc_os12g07640 12012.m04753 protein myb-related protein Zm38, putative, expressed no original description
Lus10036728	97.6667	69.3333	104.511	1.12174	83	62	72.6168	25.7544	myb domain protein 88	weakly similar to ( 158) AT1G14350 .g Symbols: FLP, MYB124 .g FLP (FOUR LIPS); DNA binding / transcription factor .g chr1:4908427-4910647 FORWARD no original description
Lus10027189	1	1	2.44014	1.12174	1	1	3.10325	15.2243	myb domain protein 101	moderately similar to ( 226) AT2G32460 .g Symbols: MYB101, ATMYB101, ATM1 .g MYB101; DNA binding / transcription factor .g chr2:13782419-13784359 REVERSEmoderately similar to ( 209) GAM1_ORYSA Transcription factor GAMYB (OsGAMyb) - Oryza sativa (Rice)moderately similar to ( 211) loc_os01g59660 12001.m42740 protein transcription factor GAMYB, putative, expressed no original description
Lus10041142	4.66667	53	2.09733	1.12174	3.66667	60.3333	2.43408	20.0955	myb domain protein 93	moderately similar to ( 282) AT1G34670 .g Symbols: AtMYB93 .g AtMYB93 (myb domain protein 93); DNA binding / transcription factor .g chr1:12709128-12710423 FORWARDweakly similar to ( 200) MYB4_ORYSA Myb-related protein Myb4 (OsMyb4) (Transcription factor RLTR1) - Oryza sativa (Rice)moderately similar to ( 280) loc_os08g37970 12008.m07782 protein myb-like DNA-binding domain containing protein, exp…
Lus10004042	44.6667	1	1.04777	1.12174	10.3333	1	1.03726	1.04765	myb domain protein 20	moderately similar to ( 239) AT1G66230 .g Symbols: MYB20, AtMYB20 .g MYB20 (myb domain protein 20); DNA binding / transcription factor .g chr1:24677322-24678246 FORWARDmoderately similar to ( 221) ODO1_PETHY ODORANT1 protein (MYB-like protein ODO1) - Petunia hybrida (Petunia)moderately similar to ( 233) loc_os09g23620 12009.m05519 protein odorant 1 protein, putative, expressed no original descrip…
Lus10028248	1	89.3333	1.04777	1.12174	1	72	1.03726	3.09806	myb domain protein 68	moderately similar to ( 248) AT3G49690 .g Symbols: RAX3, MYB84, ATMYB84 .g MYB84 (MYB DOMAIN PROTEIN 84); DNA binding / transcription factor .g chr3:18427941-18429100 FORWARDweakly similar to ( 169) MYB38_MAIZE Myb-related protein Zm38 - Zea mays (Maize)moderately similar to ( 251) loc_os03g56090 12003.m10520 protein DNA binding protein, putative, expressed no original description
Lus10034372	1.33333	5.33333	48.5432	1.12174	1	2.33333	39.3612	15.686	myb domain protein 121	weakly similar to ( 177) AT3G24310 .g Symbols: MYB305, ATMYB71 .g MYB305 (myb domain protein 305); DNA binding / transcription factor .g chr3:8811336-8812330 REVERSEweakly similar to ( 147) MYBA2_ORYSA Myb-related protein MYBAS2 - Oryza sativa (Rice)weakly similar to ( 183) loc_os02g40530 12002.m09139 protein MYB305, putative, expressed no original description
Lus10015376	564.333	3	30.364	1.12174	529.333	4.33333	85.1819	19.1187	myb domain protein 16	moderately similar to ( 236) AT3G01140 .g Symbols: MYB106, AtMYB106 .g MYB106 (myb domain protein 106); DNA binding / transcription factor .g chr3:46619-48143 REVERSEweakly similar to ( 151) MYB38_MAIZE Myb-related protein Zm38 - Zea mays (Maize)moderately similar to ( 231) loc_os08g33660 12008.m07356 protein MYB1, putative, expressed no original description
Lus10009522	368.333	3	23.0493	1.12174	311.667	3	42.1368	24.5964	myb domain protein 60	moderately similar to ( 241) AT5G62470 .g Symbols: MYB96 .g MYB96 (myb domain protein 96); DNA binding / transcription factor .g chr5:25079434-25080858 REVERSEweakly similar to ( 188) MYB4_ORYSA Myb-related protein Myb4 (OsMyb4) (Transcription factor RLTR1) - Oryza sativa (Rice)moderately similar to ( 249) loc_os12g03150 12012.m04313 protein MYB60, putative, expressed no original description
Lus10025355	243.333	27	23.4194	2.58253	219.333	28.3333	31.7998	4.94212	myb-like HTH transcriptional regulator family protein	moderately similar to ( 311) AT2G37630 .g Symbols: ATPHAN, AS1, ATMYB91, MYB91 .g AS1 (ASYMMETRIC LEAVES 1); DNA binding / protein homodimerization/ transcription factor .g chr2:15781798-15782901 REVERSEvery weakly similar to ( 100) GAM1_ORYSA Transcription factor GAMYB (OsGAMyb) - Oryza sativa (Rice)moderately similar to ( 249) loc_os12g38400 12012.m26938 protein protein ASYMMETRIC LEAVES1, puta…
Lus10014784	44.6667	16.3333	2.09997	5.8693	51.6667	23.3333	4.82429	9.50239	myb domain protein 17	moderately similar to ( 317) AT3G61250 .g Symbols: AtMYB17 .g AtMYB17 (myb domain protein 17); DNA binding / transcription factor .g chr3:22671306-22672551 FORWARDmoderately similar to ( 205) ODO1_PETHY ODORANT1 protein (MYB-like protein ODO1) - Petunia hybrida (Petunia)moderately similar to ( 259) loc_os02g42870 12002.m09322 protein P-type R2R3 Myb protein, putative, expressed no original descri…
Lus10040139	1.66667	37	2.80144	7.69528	2	56.3333	3.46338	47.222	myb domain protein 9	moderately similar to ( 215) AT4G17785 .g Symbols: MYB39 .g MYB39 (myb domain protein 39); DNA binding / transcription factor .g chr4:9881867-9883368 REVERSEweakly similar to ( 198) ODO1_PETHY ODORANT1 protein (MYB-like protein ODO1) - Petunia hybrida (Petunia)moderately similar to ( 226) loc_os08g37970 12008.m07782 protein myb-like DNA-binding domain containing protein, expressed no original des…
Lus10023002	10.3333	199	2.09997	11.5164	5	157	2.76497	41.116	Duplicated homeodomain-like superfamily protein	moderately similar to ( 231) AT2G36890 .g Symbols: RAX2, MYB38, ATMYB38, BIT1 .g RAX2 (REGULATOR OF AXILLARY MERISTEMS 2); DNA binding / transcription factor .g chr2:15485821-15487245 FORWARDweakly similar to ( 168) MYB38_MAIZE Myb-related protein Zm38 - Zea mays (Maize)moderately similar to ( 223) loc_os08g15020 12008.m05625 protein MYB36, putative, expressed no original description
Lus10036472	2.33333	61	2.44892	12.4159	4.66667	64.6667	1.03726	17.4854	myb domain protein 92	moderately similar to ( 280) AT1G34670 .g Symbols: AtMYB93 .g AtMYB93 (myb domain protein 93); DNA binding / transcription factor .g chr1:12709128-12710423 FORWARDmoderately similar to ( 202) ODO1_PETHY ODORANT1 protein (MYB-like protein ODO1) - Petunia hybrida (Petunia)moderately similar to ( 281) loc_os08g37970 12008.m07782 protein myb-like DNA-binding domain containing protein, expressed no or…
Lus10036103	50.3333	43.6667	16.4206	12.9041	55.6667	44.6667	17.9483	13.3562	myb domain protein 65	moderately similar to ( 277) AT3G11440 .g Symbols: ATMYB65, MYB65 .g MYB65 (MYB DOMAIN PROTEIN 65); DNA binding / transcription factor .g chr3:3603056-3604929 FORWARDmoderately similar to ( 268) GAM1_ORYSA Transcription factor GAMYB (OsGAMyb) - Oryza sativa (Rice)moderately similar to ( 271) loc_os01g59660 12001.m42740 protein transcription factor GAMYB, putative, expressed no original description
Lus10024392	357.667	164.667	14.6865	16.512	412	189	24.8156	14.3794	myb-like HTH transcriptional regulator family protein	moderately similar to ( 349) AT2G37630 .g Symbols: ATPHAN, AS1, ATMYB91, MYB91 .g AS1 (ASYMMETRIC LEAVES 1); DNA binding / protein homodimerization/ transcription factor .g chr2:15781798-15782901 REVERSEvery weakly similar to ( 100) GAM1_ORYSA Transcription factor GAMYB (OsGAMyb) - Oryza sativa (Rice)weakly similar to ( 172) loc_os12g38400 12012.m26938 protein protein ASYMMETRIC LEAVES1, putative…
Lus10039735	1	1	1.04777	17.5556	1	1	1.03726	7.2272	myb domain protein 53	weakly similar to ( 169) AT5G60890 .g Symbols: ATMYB34, ATR1, MYB34 .g MYB34 (MYB DOMAIN PROTEIN 34); DNA binding / kinase/ transcription activator/ transcription factor .g chr5:24495029-24496220 FORWARDweakly similar to ( 168) MYB4_ORYSA Myb-related protein Myb4 (OsMyb4) (Transcription factor RLTR1) - Oryza sativa (Rice)weakly similar to ( 175) loc_os02g51799 12002.m100745 protein myb-like DNA-b…
Lus10022932	1	1	2.09554	17.6517	1	1	2.77903	2.41186	myb family transcription factor	weakly similar to ( 105) AT5G41020 .g Symbols: .g myb family transcription factor .g chr5:16425883-16427649 REVERSE no original description
Lus10010974	1	1	8.01729	18.0629	1	1	17.5876	1.04765	myb domain protein 43	moderately similar to ( 209) AT5G16600 .g Symbols: MYB43, AtMYB43 .g MYB43 (myb domain protein 43); DNA binding / transcription factor .g chr5:5438291-5440214 FORWARDmoderately similar to ( 203) ODO1_PETHY ODORANT1 protein (MYB-like protein ODO1) - Petunia hybrida (Petunia)moderately similar to ( 207) loc_os06g14670 12006.m06182 protein odorant 1 protein, putative, expressed no original descripti…
Lus10021428	15.6667	109	8.37774	18.9853	12	98.6667	17.2481	44.678	myb domain protein 36	moderately similar to ( 234) AT5G57620 .g Symbols: MYB36, AtMYB36 .g MYB36 (myb domain protein 36); DNA binding / transcription factor .g chr5:23334904-23336388 FORWARDweakly similar to ( 165) MYB4_ORYSA Myb-related protein Myb4 (OsMyb4) (Transcription factor RLTR1) - Oryza sativa (Rice)moderately similar to ( 227) loc_os08g15020 12008.m05625 protein MYB36, putative, expressed no original descrip…
Lus10036336	58	47.6667	4.88463	19.4776	36.3333	66.3333	12.7707	15.968	myb domain protein 12	moderately similar to ( 213) AT2G47460 .g Symbols: MYB12, ATMYB12, PFG1 .g MYB12 (MYB DOMAIN PROTEIN 12); DNA binding / transcription activator/ transcription factor .g chr2:19476438-19479242 FORWARDmoderately similar to ( 215) MYBP_MAIZE Myb-related protein P - Zea mays (Maize)weakly similar to ( 196) loc_os03g19120 12003.m07329 protein yellow seed1, putative no original description
Lus10042111	3	4	1.04777	20.35	1.66667	3.33333	1.03726	3.78016	myb domain protein 98	moderately similar to ( 235) AT4G18770 .g Symbols: MYB98, AtMYB98 .g MYB98 (myb domain protein 98); DNA binding / transcription factor .g chr4:10311068-10312557 FORWARDweakly similar to ( 102) MYB38_MAIZE Myb-related protein Zm38 - Zea mays (Maize)weakly similar to ( 190) loc_os06g06740 12006.m05399 protein myb protein, putative, expressed REB1 no original description
Lus10020343	715	1.33333	35.99	22.3031	386.667	1.66667	56.4019	6.53112	myb domain protein 60	moderately similar to ( 239) AT5G62470 .g Symbols: MYB96 .g MYB96 (myb domain protein 96); DNA binding / transcription factor .g chr5:25079434-25080858 REVERSEweakly similar to ( 187) MYB4_ORYSA Myb-related protein Myb4 (OsMyb4) (Transcription factor RLTR1) - Oryza sativa (Rice)moderately similar to ( 244) loc_os11g03440 12011.m04539 protein myb-like DNA-binding domain containing protein, express…
Lus10026620	2.33333	2	1.04777	24.6865	1	1.33333	2.41705	1.04765	myb domain protein 106	moderately similar to ( 287) AT3G01140 .g Symbols: MYB106, AtMYB106 .g MYB106 (myb domain protein 106); DNA binding / transcription factor .g chr3:46619-48143 REVERSEweakly similar to ( 192) ODO1_PETHY ODORANT1 protein (MYB-like protein ODO1) - Petunia hybrida (Petunia)moderately similar to ( 295) loc_os08g33660 12008.m07356 protein MYB1, putative, expressed REB1 no original description
Lus10005245	64.3333	1.33333	27.2649	24.6865	76	2.33333	32.4513	14.0855	myb domain protein 94	moderately similar to ( 245) AT3G28910 .g Symbols: ATMYB30, MYB30 .g MYB30 (MYB DOMAIN PROTEIN 30); DNA binding / transcription factor .g chr3:10911443-10912856 FORWARDweakly similar to ( 167) MYB4_ORYSA Myb-related protein Myb4 (OsMyb4) (Transcription factor RLTR1) - Oryza sativa (Rice)moderately similar to ( 235) loc_os08g33940 12008.m07384 protein MYB96, putative, expressed no original descrip…
Lus10032298	193.667	673.333	78.271	25.5629	202	653	130.945	181.036	myb domain protein 103	moderately similar to ( 261) AT1G63910 .g Symbols: AtMYB103 .g AtMYB103 (myb domain protein 103); DNA binding / transcription activator/ transcription factor .g chr1:23719968-23721625 REVERSEweakly similar to ( 187) RS10_ORYSA 40S ribosomal protein S10 - Oryza sativa (Rice)moderately similar to ( 250) loc_os08g05520 12008.m04695 protein myb-like DNA-binding domain containing protein, expressed S1…
Lus10027110	3.33333	2.66667	91.0842	27.2677	3.66667	3.33333	61.9202	17.8186	myb domain protein 103	moderately similar to ( 219) AT5G56110 .g Symbols: ATMYB80, ATMYB103, MYB103, MS188 .g ATMYB103 (ARABIDOPSIS THALIANA MYB DOMAIN PROTEIN 103); DNA binding / transcription factor .g chr5:22719191-22720664 FORWARDvery weakly similar to (94.7) MYB38_MAIZE Myb-related protein Zm38 - Zea mays (Maize)moderately similar to ( 226) loc_os04g39470 12004.m08936 protein expressed protein no original descript…
Lus10007248	2	137	5.59309	30.0932	4.66667	149.333	5.20941	46.828	myb domain protein 36	moderately similar to ( 249) AT5G65790 .g Symbols: ATMYB68, MYB68 .g MYB68 (MYB DOMAIN PROTEIN 68); DNA binding / transcription factor .g chr5:26323035-26324385 FORWARDweakly similar to ( 170) MYB38_MAIZE Myb-related protein Zm38 - Zea mays (Maize)moderately similar to ( 254) loc_os03g56090 12003.m10520 protein DNA binding protein, putative, expressed no original description
Lus10026787	71	61.3333	22.725	30.5855	58.3333	51.6667	15.883	9.58212	myb domain protein 65	moderately similar to ( 268) AT3G11440 .g Symbols: ATMYB65, MYB65 .g MYB65 (MYB DOMAIN PROTEIN 65); DNA binding / transcription factor .g chr3:3603056-3604929 FORWARDmoderately similar to ( 257) GAM1_ORYSA Transcription factor GAMYB (OsGAMyb) - Oryza sativa (Rice)moderately similar to ( 257) loc_os01g59660 12001.m42740 protein transcription factor GAMYB, putative, expressed no original description
Lus10013084	1	1	1.04777	30.7677	1	1	1.03726	1.04765	myb domain protein 118	weakly similar to ( 180) AT3G27785 .g Symbols: MYB118, ATMYB118 .g MYB118; DNA binding / transcription activator/ transcription factor .g chr3:10288767-10290712 REVERSEweakly similar to ( 105) GAM1_ORYSA Transcription factor GAMYB (OsGAMyb) - Oryza sativa (Rice)weakly similar to ( 160) loc_os12g07610 12012.m04750 protein myb family transcription factor, putative REB1 no original description
Lus10005864	1	1	1.74395	30.7987	1	1	1.03726	10.5337	myb domain protein 119	weakly similar to ( 179) AT5G58850 .g Symbols: ATMYB119, MYB119 .g MYB119 (MYB DOMAIN PROTEIN 119); DNA binding / transcription factor .g chr5:23763945-23765441 FORWARDweakly similar to ( 106) ODO1_PETHY ODORANT1 protein (MYB-like protein ODO1) - Petunia hybrida (Petunia)weakly similar to ( 167) loc_os06g06740 12006.m05399 protein myb protein, putative, expressed REB1 no original description
Lus10008353	1.33333	1.66667	21.9574	31.9924	3	2	27.3047	6.19417	myb domain protein 103	moderately similar to ( 219) AT5G56110 .g Symbols: ATMYB80, ATMYB103, MYB103, MS188 .g ATMYB103 (ARABIDOPSIS THALIANA MYB DOMAIN PROTEIN 103); DNA binding / transcription factor .g chr5:22719191-22720664 FORWARDvery weakly similar to (94.4) MYB38_MAIZE Myb-related protein Zm38 - Zea mays (Maize)moderately similar to ( 223) loc_os04g39470 12004.m08936 protein expressed protein no original descript…
Lus10028435	506	127	80.7016	34.4968	632.667	125	96.3263	41.1405	myb domain protein 7	moderately similar to ( 239) AT4G38620 .g Symbols: ATMYB4, MYB4 .g MYB4; DNA binding / transcription factor .g chr4:18053866-18054876 FORWARDmoderately similar to ( 239) MYB38_MAIZE Myb-related protein Zm38 - Zea mays (Maize)moderately similar to ( 243) loc_os11g07890 12011.m04985 protein transposon protein, putative, CACTA, En/Spm sub-class no original description
Lus10028979	1	3.33333	1.04777	35.4924	1.33333	2.33333	1.73567	13.2843	myb domain protein 73	weakly similar to ( 169) AT4G37260 .g Symbols: MYB73, ATMYB73 .g MYB73 (MYB DOMAIN PROTEIN 73); DNA binding / transcription factor .g chr4:17540602-17541564 FORWARDweakly similar to ( 104) MYB1_MAIZE Myb-related protein Zm1 - Zea mays (Maize)weakly similar to ( 161) loc_os02g09480 12002.m06245 protein MYB transcription factor TaMYB1, putative, expressed REB1 no original description
Lus10018547	1.66667	3.66667	2.44014	36.0075	2.66667	3.66667	1.03726	27.4469	MYB-like 102	weakly similar to ( 170) AT4G21440 .g Symbols: ATMYB102, ATM4 .g ATMYB102 (ARABIDOPSIS MYB-LIKE 102); DNA binding / transcription factor .g chr4:11418425-11419652 REVERSEweakly similar to ( 169) MYB1_MAIZE Myb-related protein Zm1 - Zea mays (Maize)weakly similar to ( 178) loc_os08g37970 12008.m07782 protein myb-like DNA-binding domain containing protein, expressed no original description
Lus10037202	226.667	150.667	226.046	38.3179	158.667	140	138.768	42.7272	myb domain protein 88	weakly similar to ( 157) AT2G02820 .g Symbols: MYB88 .g MYB88 (myb domain protein 88); DNA binding / transcription factor .g chr2:804716-807139 REVERSE no original description
Lus10004489	54.3333	165.333	29.3157	42.0618	66.6667	166.333	38.6553	49.0504	DIRP ;Myb-like DNA-binding domain	moderately similar to ( 486) AT3G05380 .g Symbols: ALY2, ATALY2 .g DNA binding / nucleic acid binding / transcription factor .g chr3:1540961-1546139 FORWARDmoderately similar to ( 280) loc_os03g43800 12003.m35327 protein always early protein 3, putative, expressed DIRP no original description
Lus10002056	285	43.6667	67.1949	43.0423	212.667	45	54.2845	39.7248	myb domain protein 96	moderately similar to ( 260) AT3G47600 .g Symbols: MYB94, ATMYBCP70, ATMYB94 .g ATMYB94 (MYB DOMAIN PROTEIN 94); DNA binding / transcription factor .g chr3:17539627-17541035 REVERSEweakly similar to ( 179) MYB4_ORYSA Myb-related protein Myb4 (OsMyb4) (Transcription factor RLTR1) - Oryza sativa (Rice)moderately similar to ( 253) loc_os08g33940 12008.m07384 protein MYB96, putative, expressed REB1 n…
Lus10028513	3.33333	1.66667	1.74481	44.2629	9.33333	1	1.38036	11.6875	myb domain protein 113	weakly similar to ( 199) AT1G66370 .g Symbols: MYB113, AtMYB113 .g MYB113 (myb domain protein 113); DNA binding / transcription factor .g chr1:24753634-24754604 FORWARDweakly similar to ( 152) MYBC_MAIZE Anthocyanin regulatory C1 protein - Zea mays (Maize)weakly similar to ( 151) loc_os01g50110 12001.m11195 protein myb-related protein Hv33, putative, expressed no original description
Lus10029910	149	266.333	182.539	52.8486	156.667	261.667	137.673	97.7227	DIRP ;Myb-like DNA-binding domain	moderately similar to ( 365) AT3G05380 .g Symbols: ALY2, ATALY2 .g DNA binding / nucleic acid binding / transcription factor .g chr3:1540961-1546139 FORWARDmoderately similar to ( 285) loc_os03g43800 12003.m35327 protein always early protein 3, putative, expressed DIRP no original description
Lus10031609	6	2	12.5652	57.5924	3.33333	7.66667	20.3892	87.6934	MYB-like 102	weakly similar to ( 157) AT4G21440 .g Symbols: ATMYB102, ATM4 .g ATMYB102 (ARABIDOPSIS MYB-LIKE 102); DNA binding / transcription factor .g chr4:11418425-11419652 REVERSEweakly similar to ( 117) MYB38_MAIZE Myb-related protein Zm38 - Zea mays (Maize)weakly similar to ( 132) loc_os07g37210 12007.m07971 protein MYB transcription factor, putative, expressed no original description
Lus10033735	4.66667	5	3.15217	64.952	4.66667	20.3333	2.08487	86.8799	MYB-like 102	weakly similar to ( 164) AT4G21440 .g Symbols: ATMYB102, ATM4 .g ATMYB102 (ARABIDOPSIS MYB-LIKE 102); DNA binding / transcription factor .g chr4:11418425-11419652 REVERSEweakly similar to ( 117) MYB38_MAIZE Myb-related protein Zm38 - Zea mays (Maize)weakly similar to ( 131) loc_os07g37210 12007.m07971 protein MYB transcription factor, putative, expressed no original description
Lus10009129	1	1.33333	5.92361	65.0883	1.33333	2	10.0107	104.557	myb domain protein 113	weakly similar to ( 172) AT1G66370 .g Symbols: MYB113, AtMYB113 .g MYB113 (myb domain protein 113); DNA binding / transcription factor .g chr1:24753634-24754604 FORWARDweakly similar to ( 144) MYBC_MAIZE Anthocyanin regulatory C1 protein - Zea mays (Maize)weakly similar to ( 144) loc_os03g29614 12003.m08231 protein anthocyanin regulatory C1 protein, putative, expressed no original description
Lus10031181	21.3333	213.667	20.6148	66.5071	12.6667	232	14.5923	265.7	myb domain protein 63	weakly similar to ( 115) AT1G56160 .g Symbols: ATMYB72, MYB72 .g MYB72 (MYB DOMAIN PROTEIN 72); DNA binding / transcription factor .g chr1:21022384-21023444 FORWARDweakly similar to ( 103) MYB1_MAIZE Myb-related protein Zm1 - Zea mays (Maize)weakly similar to ( 108) loc_os04g50770 12004.m09974 protein myb-related protein Zm1, putative, expressed no original description
Lus10027459	7	4	1.04777	70.3781	13.6667	6	2.76256	20.0178	myb domain protein 17	moderately similar to ( 217) AT3G61250 .g Symbols: AtMYB17 .g AtMYB17 (myb domain protein 17); DNA binding / transcription factor .g chr3:22671306-22672551 FORWARDweakly similar to ( 186) MYB4_ORYSA Myb-related protein Myb4 (OsMyb4) (Transcription factor RLTR1) - Oryza sativa (Rice)weakly similar to ( 197) loc_os08g37970 12008.m07782 protein myb-like DNA-binding domain containing protein, express…
Lus10021871	12.3333	6.66667	5.58959	72.2	16	10.3333	6.90306	81.092	myb domain protein 15	moderately similar to ( 223) AT3G23250 .g Symbols: MYB15, ATY19, ATMYB15 .g MYB15 (MYB DOMAIN PROTEIN 15); DNA binding / transcription factor .g chr3:8309742-8310624 FORWARDmoderately similar to ( 217) MYB4_ORYSA Myb-related protein Myb4 (OsMyb4) (Transcription factor RLTR1) - Oryza sativa (Rice)moderately similar to ( 217) loc_os04g43680 12004.m09327 protein myb-related protein Myb4, putative, e…
Lus10021762	52	620	15.379	73.5958	41.3333	616	22.126	130.29	myb domain protein 70	weakly similar to ( 177) AT2G23290 .g Symbols: AtMYB70 .g AtMYB70 (myb domain protein 70); DNA binding / transcription factor .g chr2:9904895-9905824 REVERSEweakly similar to ( 114) MYBA1_ORYSA Myb-related protein MYBAS1 - Oryza sativa (Rice)weakly similar to ( 173) loc_os09g01960 12009.m03570 protein sucrose responsive element binding protein, putative, expressed REB1 no original description
Lus10002435	16.3333	145	13.9631	74.3741	14.3333	112	20.3722	39.3292	myb domain protein 12	weakly similar to ( 199) AT2G47460 .g Symbols: MYB12, ATMYB12, PFG1 .g MYB12 (MYB DOMAIN PROTEIN 12); DNA binding / transcription activator/ transcription factor .g chr2:19476438-19479242 FORWARDweakly similar to ( 192) MYBP_MAIZE Myb-related protein P - Zea mays (Maize)weakly similar to ( 182) loc_os03g19120 12003.m07329 protein yellow seed1, putative no original description
Lus10022021	1	1	1.04777	74.3991	1	1.33333	1.03726	20.2425	myb domain protein 14	moderately similar to ( 205) AT2G31180 .g Symbols: ATMYB14, MYB14AT, MYB14 .g MYB14 (MYB DOMAIN PROTEIN 14); DNA binding / transcription factor .g chr2:13286806-13288175 REVERSEmoderately similar to ( 207) MYB4_ORYSA Myb-related protein Myb4 (OsMyb4) (Transcription factor RLTR1) - Oryza sativa (Rice)moderately similar to ( 207) loc_os04g43680 12004.m09327 protein myb-related protein Myb4, putativ…
Lus10032226	18.6667	17.3333	33.8525	74.7895	18.6667	33	82.4871	35.6605	myb domain protein 42	moderately similar to ( 261) AT4G12350 .g Symbols: MYB42, AtMYB42 .g MYB42 (myb domain protein 42); transcription factor .g chr4:7324912-7326636 FORWARDmoderately similar to ( 270) ODO1_PETHY ODORANT1 protein (MYB-like protein ODO1) - Petunia hybrida (Petunia)moderately similar to ( 262) loc_os09g36250 12009.m06574 protein odorant 1 protein, putative, expressed no original description
Lus10014453	17.6667	7	88.1114	84.2806	9.33333	5.66667	29.7693	138.904	myb domain protein 305	moderately similar to ( 208) AT3G24310 .g Symbols: MYB305, ATMYB71 .g MYB305 (myb domain protein 305); DNA binding / transcription factor .g chr3:8811336-8812330 REVERSEweakly similar to ( 154) MYBA2_ORYSA Myb-related protein MYBAS2 - Oryza sativa (Rice)weakly similar to ( 196) loc_os02g40530 12002.m09139 protein MYB305, putative, expressed no original description
Lus10011031	1	45.6667	1.39851	86.9638	1	63.3333	1.38036	397.512	myb domain protein 9	moderately similar to ( 201) AT5G16770 .g Symbols: AtMYB9 .g AtMYB9 (myb domain protein 9); DNA binding / transcription factor .g chr5:5515209-5516734 FORWARDweakly similar to ( 185) ODO1_PETHY ODORANT1 protein (MYB-like protein ODO1) - Petunia hybrida (Petunia)moderately similar to ( 202) loc_os06g02250 12006.m04959 protein transcription factor MYB102, putative no original description
Lus10005791	398.667	26.6667	111.722	87.7576	377.667	29.3333	115.797	50.6444	0	moderately similar to ( 374) loc_os01g03660 12001.m43443 protein expressed protein no original description
Lus10001394	8.66667	192	1.04777	90.0988	9.33333	136.333	1.73567	72.2837	myb domain protein 36	moderately similar to ( 228) AT2G36890 .g Symbols: RAX2, MYB38, ATMYB38, BIT1 .g RAX2 (REGULATOR OF AXILLARY MERISTEMS 2); DNA binding / transcription factor .g chr2:15485821-15487245 FORWARDweakly similar to ( 168) MYB38_MAIZE Myb-related protein Zm38 - Zea mays (Maize)moderately similar to ( 224) loc_os03g56090 12003.m10520 protein DNA binding protein, putative, expressed no original description
Lus10024636	44	65.6667	22.7252	90.456	54.6667	82.6667	25.2152	69.6901	ARID/BRIGHT DNA-binding domain;ELM2 domain protein	weakly similar to ( 186) AT4G11400 .g Symbols: .g ARID/BRIGHT DNA-binding domain-containing protein / ELM2 domain-containing protein / Myb-like DNA-binding domain-containing protein .g chr4:6938717-6940539 FORWARDmoderately similar to ( 207) loc_os04g08410 12004.m06129 protein expressed protein no original description
Lus10030494	100.333	317.667	36.3663	90.927	104.333	294.667	26.2999	161.67	myb domain protein 88	moderately similar to ( 396) AT2G02820 .g Symbols: MYB88 .g MYB88 (myb domain protein 88); DNA binding / transcription factor .g chr2:804716-807139 REVERSEmoderately similar to ( 235) loc_os07g43420 12007.m08570 protein myb, DNA-binding, putative, expressed REB1 no original description
Lus10034338	2.33333	1.66667	7.68956	91.1402	5.33333	1	5.52399	46.4464	myb domain protein 62	moderately similar to ( 243) AT1G68320 .g Symbols: MYB62, AtMYB62, BW62B, BW62C .g MYB62 (myb domain protein 62); DNA binding / transcription factor .g chr1:25603842-25604884 FORWARDweakly similar to ( 154) MYBA2_ORYSA Myb-related protein MYBAS2 - Oryza sativa (Rice)moderately similar to ( 252) loc_os01g03720 12001.m07009 protein MYB transcription factor, putative, expressed no original descripti…
Lus10018518	1	1.33333	2.44356	111.664	2	1.33333	2.762	204.207	myb domain protein 63	weakly similar to ( 162) AT5G10280 .g Symbols: MYB92, ATMYB92, ATMYB64 .g ATMYB92 (MYB DOMAIN PROTEIN 92); DNA binding / transcription factor .g chr5:3232776-3233956 FORWARDweakly similar to ( 155) MYB1_HORVU Myb-related protein Hv1 - Hordeum vulgare (Barley)weakly similar to ( 163) loc_os10g33810 12010.m06210 protein myb-related protein Myb4, putative, expressed no original description
Lus10041714	133.333	119	277.536	112.618	141	131	259.147	145.654	myb family transcription factor	moderately similar to ( 302) AT5G41020 .g Symbols: .g myb family transcription factor .g chr5:16425883-16427649 REVERSEmoderately similar to ( 267) loc_os06g19980 12006.m06655 protein myb-like DNA-binding domain containing protein, expressed no original description
Lus10006647	1.33333	3.33333	29.6538	113.602	6.66667	2.33333	63.1812	38.788	myb domain protein 82	weakly similar to ( 184) AT5G52600 .g Symbols: AtMYB82 .g AtMYB82 (myb domain protein 82); DNA binding / transcription factor .g chr5:21343197-21343968 REVERSEweakly similar to ( 140) MYBC_MAIZE Anthocyanin regulatory C1 protein - Zea mays (Maize)weakly similar to ( 136) loc_os09g36730 12009.m06622 protein myb-related protein Hv1, putative, expressed no original description
Lus10030378	93.3333	40.3333	9.08908	121.106	124	36.3333	21.4224	45.0248	myb domain protein 17	moderately similar to ( 305) AT3G61250 .g Symbols: AtMYB17 .g AtMYB17 (myb domain protein 17); DNA binding / transcription factor .g chr3:22671306-22672551 FORWARDmoderately similar to ( 203) ODO1_PETHY ODORANT1 protein (MYB-like protein ODO1) - Petunia hybrida (Petunia)moderately similar to ( 251) loc_os02g42870 12002.m09322 protein P-type R2R3 Myb protein, putative, expressed no original descri…
Lus10041888	245.667	16	74.3584	130.086	241.333	16.3333	98.3163	57.1428	myb domain protein 4	moderately similar to ( 237) AT4G38620 .g Symbols: ATMYB4, MYB4 .g MYB4; DNA binding / transcription factor .g chr4:18053866-18054876 FORWARDmoderately similar to ( 238) MYB38_MAIZE Myb-related protein Zm38 - Zea mays (Maize)moderately similar to ( 239) loc_os11g07890 12011.m04985 protein transposon protein, putative, CACTA, En/Spm sub-class no original description
Lus10005886	3917.33	1855.67	1313.63	138.885	3425.67	1771.67	832.406	247.593	myb domain protein 48	moderately similar to ( 241) AT5G59780 .g Symbols: MYB59, ATMYB59-2 .g MYB59 (MYB DOMAIN PROTEIN 59); DNA binding / transcription factor .g chr5:24082425-24083255 REVERSEmoderately similar to ( 214) MYBA2_ORYSA Myb-related protein MYBAS2 - Oryza sativa (Rice)moderately similar to ( 214) loc_os12g37970 12012.m56456 protein MYB59, putative, expressed no original description
Lus10018418	88.3333	7	359.645	149.631	80.3333	3	1111.43	31.2282	MYB-like 102	moderately similar to ( 288) AT4G21440 .g Symbols: ATMYB102, ATM4 .g ATMYB102 (ARABIDOPSIS MYB-LIKE 102); DNA binding / transcription factor .g chr4:11418425-11419652 REVERSEmoderately similar to ( 218) MYB38_MAIZE Myb-related protein Zm38 - Zea mays (Maize)moderately similar to ( 261) loc_os07g37210 12007.m07971 protein MYB transcription factor, putative, expressed no original description
Lus10011687	174.333	741.667	306.893	157.379	168.333	610.667	229.557	207.348	Homeodomain-like protein	moderately similar to ( 468) AT4G32730 .g Symbols: PC-MYB1, MYB3R-1, ATMYB3R-1, ATMYB3R1 .g PC-MYB1; DNA binding / transcription coactivator/ transcription factor .g chr4:15791039-15795643 FORWARDweakly similar to ( 105) GAM1_ORYSA Transcription factor GAMYB (OsGAMyb) - Oryza sativa (Rice)moderately similar to ( 346) loc_os12g13570 12012.m05329 protein myb, putative, expressed REB1 no original de…
Lus10000411	30.6667	66	40.5158	174.526	29.3333	101	86.6654	103.837	myb domain protein 6	moderately similar to ( 293) AT4G09460 .g Symbols: ATMYB6 .g ATMYB6; DNA binding / transcription factor .g chr4:5993019-5994038 FORWARDmoderately similar to ( 253) MYB38_MAIZE Myb-related protein Zm38 - Zea mays (Maize)moderately similar to ( 272) loc_os05g35500 12005.m07780 protein mybHv5, putative, expressed no original description
Lus10001093	2	35	11.5362	175.608	1.66667	53	37.5807	145.018	myb domain protein 9	moderately similar to ( 218) AT4G17785 .g Symbols: MYB39 .g MYB39 (myb domain protein 39); DNA binding / transcription factor .g chr4:9881867-9883368 REVERSEmoderately similar to ( 201) ODO1_PETHY ODORANT1 protein (MYB-like protein ODO1) - Petunia hybrida (Petunia)moderately similar to ( 228) loc_os08g37970 12008.m07782 protein myb-like DNA-binding domain containing protein, expressed no original…
Lus10033003	577.667	26	118.798	183.064	487	22.3333	110.181	79.9973	myb domain protein 16	moderately similar to ( 291) AT3G01140 .g Symbols: MYB106, AtMYB106 .g MYB106 (myb domain protein 106); DNA binding / transcription factor .g chr3:46619-48143 REVERSEmoderately similar to ( 202) ODO1_PETHY ODORANT1 protein (MYB-like protein ODO1) - Petunia hybrida (Petunia)moderately similar to ( 293) loc_os08g33660 12008.m07356 protein MYB1, putative, expressed no original description
Lus10030677	38	25	18.1586	191.704	33.6667	31.3333	38.9647	140.859	myb domain protein 94	moderately similar to ( 266) AT3G28910 .g Symbols: ATMYB30, MYB30 .g MYB30 (MYB DOMAIN PROTEIN 30); DNA binding / transcription factor .g chr3:10911443-10912856 FORWARDweakly similar to ( 176) MYB4_ORYSA Myb-related protein Myb4 (OsMyb4) (Transcription factor RLTR1) - Oryza sativa (Rice)moderately similar to ( 250) loc_os08g33940 12008.m07384 protein MYB96, putative, expressed no original descrip…
Lus10012847	115	184.333	52.7561	191.773	97	206	32.5704	199.907	myb domain protein 88	moderately similar to ( 363) AT2G02820 .g Symbols: MYB88 .g MYB88 (myb domain protein 88); DNA binding / transcription factor .g chr2:804716-807139 REVERSEvery weakly similar to (80.5) MYB4_ORYSA Myb-related protein Myb4 (OsMyb4) (Transcription factor RLTR1) - Oryza sativa (Rice)moderately similar to ( 244) loc_os07g43420 12007.m08570 protein myb, DNA-binding, putative, expressed REB1 no original…
Lus10040861	3790.67	2154.67	706.762	192.427	3754.33	2238.33	702.043	207.25	myb domain protein 48	weakly similar to ( 131) AT3G46130 .g Symbols: MYB111, PFG3, ATMYB48-2 .g MYB111 (MYB DOMAIN PROTEIN 111); DNA binding / transcription factor .g chr3:16945465-16946376 FORWARDweakly similar to ( 113) MYBA1_ORYSA Myb-related protein MYBAS1 - Oryza sativa (Rice)weakly similar to ( 113) loc_os11g47460 12011.m28697 protein MYB59, putative, expressed no original description
Lus10022136	58.3333	509	129.066	192.599	71	462.333	133.075	117.892	Homeodomain-like protein	highly similar to ( 640) AT4G32730 .g Symbols: PC-MYB1, MYB3R-1, ATMYB3R-1, ATMYB3R1 .g PC-MYB1; DNA binding / transcription coactivator/ transcription factor .g chr4:15791039-15795643 FORWARDweakly similar to ( 105) GAM1_ORYSA Transcription factor GAMYB (OsGAMyb) - Oryza sativa (Rice)moderately similar to ( 438) loc_os12g13570 12012.m05329 protein myb, putative, expressed REB1 no original descri…
Lus10023711	4.66667	9.66667	24.4873	194.281	4.66667	8.66667	6.57643	299.864	myb domain protein 305	moderately similar to ( 205) AT3G24310 .g Symbols: MYB305, ATMYB71 .g MYB305 (myb domain protein 305); DNA binding / transcription factor .g chr3:8811336-8812330 REVERSEweakly similar to ( 156) MYBA2_ORYSA Myb-related protein MYBAS2 - Oryza sativa (Rice)weakly similar to ( 191) loc_os02g40530 12002.m09139 protein MYB305, putative, expressed no original description
Lus10039772	3.66667	24.6667	1.39586	211.013	5.33333	35.6667	1.03726	199.07	MYB-like 102	weakly similar to ( 166) AT4G38620 .g Symbols: ATMYB4, MYB4 .g MYB4; DNA binding / transcription factor .g chr4:18053866-18054876 FORWARDweakly similar to ( 170) MYB1_MAIZE Myb-related protein Zm1 - Zea mays (Maize)weakly similar to ( 177) loc_os04g50770 12004.m09974 protein myb-related protein Zm1, putative, expressed no original description
Lus10009780	50.3333	73.6667	186.438	229.655	71.6667	100	181.361	151.512	myb-like HTH transcriptional regulator family protein	moderately similar to ( 204) AT3G60460 .g Symbols: DUO1 .g DUO1 (DUO POLLEN 1); DNA binding / transcription factor .g chr3:22342429-22343491 REVERSEweakly similar to ( 127) GAM1_ORYSA Transcription factor GAMYB (OsGAMyb) - Oryza sativa (Rice)weakly similar to ( 190) loc_os04g46384 12004.m101864 protein DUO1, putative no original description
Lus10015713	51.3333	17	1.04777	235	63.6667	18.3333	2.06656	235.253	myb domain protein 34	weakly similar to ( 142) AT5G60890 .g Symbols: ATMYB34, ATR1, MYB34 .g MYB34 (MYB DOMAIN PROTEIN 34); DNA binding / kinase/ transcription activator/ transcription factor .g chr5:24495029-24496220 FORWARDweakly similar to ( 123) MYB4_ORYSA Myb-related protein Myb4 (OsMyb4) (Transcription factor RLTR1) - Oryza sativa (Rice)weakly similar to ( 137) loc_os04g38740 12004.m08863 protein DNA binding pro…
Lus10024669	372.333	947	261.672	244.129	281	824.667	338.241	259.954	myb domain protein 103	moderately similar to ( 261) AT1G63910 .g Symbols: AtMYB103 .g AtMYB103 (myb domain protein 103); DNA binding / transcription activator/ transcription factor .g chr1:23719968-23721625 REVERSEweakly similar to ( 183) RS10_ORYSA 40S ribosomal protein S10 - Oryza sativa (Rice)moderately similar to ( 250) loc_os08g05520 12008.m04695 protein myb-like DNA-binding domain containing protein, expressed S1…
Lus10039646	1	46.6667	3.83771	313.926	2	61	3.11546	252.18	myb domain protein 36	moderately similar to ( 236) AT3G49690 .g Symbols: RAX3, MYB84, ATMYB84 .g MYB84 (MYB DOMAIN PROTEIN 84); DNA binding / transcription factor .g chr3:18427941-18429100 FORWARDweakly similar to ( 166) MYB38_MAIZE Myb-related protein Zm38 - Zea mays (Maize)moderately similar to ( 239) loc_os03g56090 12003.m10520 protein DNA binding protein, putative, expressed no original description
Lus10009448	282	190.667	113.894	319.557	255.333	198.667	86.3881	805.59	myb domain protein 6	moderately similar to ( 273) AT4G09460 .g Symbols: ATMYB6 .g ATMYB6; DNA binding / transcription factor .g chr4:5993019-5994038 FORWARDmoderately similar to ( 255) MYB38_MAIZE Myb-related protein Zm38 - Zea mays (Maize)moderately similar to ( 268) loc_os11g07890 12011.m04985 protein transposon protein, putative, CACTA, En/Spm sub-class no original description
Lus10010055	1491	1618.33	259.04	340.709	1698.67	1543.67	193.419	340.888	myb domain protein 73	moderately similar to ( 228) AT4G37260 .g Symbols: MYB73, ATMYB73 .g MYB73 (MYB DOMAIN PROTEIN 73); DNA binding / transcription factor .g chr4:17540602-17541564 FORWARDweakly similar to ( 110) MYBA1_ORYSA Myb-related protein MYBAS1 - Oryza sativa (Rice)moderately similar to ( 201) loc_os09g01960 12009.m03570 protein sucrose responsive element binding protein, putative, expressed REB1 no original …
Lus10031607	6.66667	1	10.1162	363.586	4	1	62.7845	668.069	myb domain protein 41	weakly similar to ( 175) AT1G34670 .g Symbols: AtMYB93 .g AtMYB93 (myb domain protein 93); DNA binding / transcription factor .g chr1:12709128-12710423 FORWARDweakly similar to ( 168) MYB4_ORYSA Myb-related protein Myb4 (OsMyb4) (Transcription factor RLTR1) - Oryza sativa (Rice)weakly similar to ( 175) loc_os08g37970 12008.m07782 protein myb-like DNA-binding domain containing protein, expressed n…
Lus10032764	46.3333	413.333	12.5918	439.991	57.6667	505	31.0976	576.839	myb domain protein 73	weakly similar to ( 179) AT2G23290 .g Symbols: AtMYB70 .g AtMYB70 (myb domain protein 70); DNA binding / transcription factor .g chr2:9904895-9905824 REVERSEweakly similar to ( 110) GAM1_ORYSA Transcription factor GAMYB (OsGAMyb) - Oryza sativa (Rice)weakly similar to ( 173) loc_os09g01960 12009.m03570 protein sucrose responsive element binding protein, putative, expressed REB1 no original descri…
Lus10021650	38.6667	67	31.0808	453.049	51.3333	64.6667	45.2858	279.407	myb-like transcription factor family protein	moderately similar to ( 500) AT2G47210 .g Symbols: .g myb family transcription factor .g chr2:19379039-19382204 FORWARDmoderately similar to ( 460) loc_os05g46330 12005.m08758 protein DNA methyltransferase 1-associated protein 1, putative, expressed no original description
Lus10030336	1523	540.333	550.556	481.237	1359.33	565.333	694.371	354.613	myb domain protein 73	moderately similar to ( 221) AT4G37260 .g Symbols: MYB73, ATMYB73 .g MYB73 (MYB DOMAIN PROTEIN 73); DNA binding / transcription factor .g chr4:17540602-17541564 FORWARDweakly similar to ( 108) GAM1_ORYSA Transcription factor GAMYB (OsGAMyb) - Oryza sativa (Rice)weakly similar to ( 191) loc_os09g01960 12009.m03570 protein sucrose responsive element binding protein, putative, expressed REB1 no orig…
Lus10008010	77	86.6667	44.3961	490.994	68	88	45.9566	359.018	myb domain protein 3r-5	moderately similar to ( 226) AT4G32730 .g Symbols: PC-MYB1, MYB3R-1, ATMYB3R-1, ATMYB3R1 .g PC-MYB1; DNA binding / transcription coactivator/ transcription factor .g chr4:15791039-15795643 FORWARDweakly similar to ( 102) MYB3_HORVU Myb-related protein Hv33 - Hordeum vulgare (Barley)moderately similar to ( 220) loc_os12g13570 12012.m05329 protein myb, putative, expressed REB1 no original descripti…
Lus10020085	9.66667	5	58.5908	503.291	12.6667	14.6667	164.766	417.485	MYB-like 102	moderately similar to ( 283) AT4G21440 .g Symbols: ATMYB102, ATM4 .g ATMYB102 (ARABIDOPSIS MYB-LIKE 102); DNA binding / transcription factor .g chr4:11418425-11419652 REVERSEweakly similar to ( 195) MYB38_MAIZE Myb-related protein Zm38 - Zea mays (Maize)moderately similar to ( 246) loc_os07g37210 12007.m07971 protein MYB transcription factor, putative, expressed no original description
Lus10032117	1	94.3333	1.04777	512.334	1	101.333	1.38646	228.021	myb domain protein 40	moderately similar to ( 240) AT5G14340 .g Symbols: AtMYB40 .g AtMYB40 (myb domain protein 40); DNA binding / transcription factor .g chr5:4623367-4624779 FORWARDmoderately similar to ( 224) MYB2_PHYPA Myb-related protein Pp2 - Physcomitrella patens (Moss)moderately similar to ( 224) loc_os09g23620 12009.m05519 protein odorant 1 protein, putative, expressed no original description
Lus10002593	111	49	685.557	535.821	101.333	33.3333	1582.21	460.518	MYB-like 102	moderately similar to ( 278) AT4G21440 .g Symbols: ATMYB102, ATM4 .g ATMYB102 (ARABIDOPSIS MYB-LIKE 102); DNA binding / transcription factor .g chr4:11418425-11419652 REVERSEmoderately similar to ( 212) MYB38_MAIZE Myb-related protein Zm38 - Zea mays (Maize)moderately similar to ( 252) loc_os07g37210 12007.m07971 protein MYB transcription factor, putative, expressed no original description
Lus10001548	633.333	214.667	213.816	544.285	493	251	186.106	919.285	myb domain protein 6	moderately similar to ( 275) AT4G09460 .g Symbols: ATMYB6 .g ATMYB6; DNA binding / transcription factor .g chr4:5993019-5994038 FORWARDmoderately similar to ( 254) MYB38_MAIZE Myb-related protein Zm38 - Zea mays (Maize)moderately similar to ( 270) loc_os11g07890 12011.m04985 protein transposon protein, putative, CACTA, En/Spm sub-class no original description
Lus10024394	236	189.667	420.698	589.472	200	202	329.446	312.867	myb domain protein 3r-3	moderately similar to ( 363) AT3G09370 .g Symbols: MYB3R-3 .g MYB3R-3 (myb domain protein 3R-3); DNA binding / transcription factor .g chr3:2879534-2882128 FORWARDweakly similar to ( 108) GAM1_ORYSA Transcription factor GAMYB (OsGAMyb) - Oryza sativa (Rice)moderately similar to ( 301) loc_os01g62410 12001.m42752 protein myb-like DNA-binding domain containing protein, expressed REB1 no original de…
Lus10019085	16.3333	35	1.04777	614.455	55	47.6667	1.72346	829.873	myb domain protein 76	moderately similar to ( 208) AT5G07700 .g Symbols: MYB76, AtMYB76 .g MYB76 (myb domain protein 76); DNA binding / transcription factor .g chr5:2450325-2451578 FORWARDweakly similar to ( 180) MYB4_ORYSA Myb-related protein Myb4 (OsMyb4) (Transcription factor RLTR1) - Oryza sativa (Rice)moderately similar to ( 209) loc_os04g38740 12004.m08863 protein DNA binding protein, putative, expressed no orig…
Lus10026528	157.667	165	165.599	652.273	168	177	122.449	510.908	TSL-kinase interacting protein 1	moderately similar to ( 493) AT2G36960 .g Symbols: TKI1 .g TKI1 (TSL-kinase interacting protein 1); DNA binding / transcription factor .g chr2:15523552-15527245 FORWARDmoderately similar to ( 374) loc_os03g13790 12003.m101263 protein TKI1, putative, expressed no original description
Lus10025351	214.333	195	314.19	706.597	186	212.333	271.367	361.223	myb domain protein 3r-3	moderately similar to ( 375) AT3G09370 .g Symbols: MYB3R-3 .g MYB3R-3 (myb domain protein 3R-3); DNA binding / transcription factor .g chr3:2879534-2882128 FORWARDweakly similar to ( 109) GAM1_ORYSA Transcription factor GAMYB (OsGAMyb) - Oryza sativa (Rice)moderately similar to ( 302) loc_os01g62410 12001.m42752 protein myb-like DNA-binding domain containing protein, expressed REB1 no original de…
Lus10037898	360.667	288.667	429.73	738.603	236	267.333	380.652	453.73	Homeodomain-like protein	moderately similar to ( 253) AT4G32730 .g Symbols: PC-MYB1, MYB3R-1, ATMYB3R-1, ATMYB3R1 .g PC-MYB1; DNA binding / transcription coactivator/ transcription factor .g chr4:15791039-15795643 FORWARDmoderately similar to ( 206) loc_os12g13570 12012.m05329 protein myb, putative, expressed no original description
Lus10033889	7.33333	809.333	68.4079	746.835	8	780.667	54.478	1200.98	myb domain protein 15	moderately similar to ( 217) AT1G06180 .g Symbols: ATMYB13, ATMYBLFGN .g ATMYB13 (MYB DOMAIN PROTEIN 13); DNA binding / transcription factor .g chr1:1889510-1891089 FORWARDmoderately similar to ( 215) MYB4_ORYSA Myb-related protein Myb4 (OsMyb4) (Transcription factor RLTR1) - Oryza sativa (Rice)moderately similar to ( 215) loc_os04g43680 12004.m09327 protein myb-related protein Myb4, putative, ex…
Lus10000680	461.667	315	833.203	758.229	448.333	335.333	802.052	497.467	ELM2 domain-containing protein	weakly similar to ( 186) AT1G13880 .g Symbols: .g ELM2 domain-containing protein .g chr1:4749603-4750967 FORWARDweakly similar to ( 183) loc_os03g31230 12003.m35283 protein DNA binding protein, putative, expressed no original description
Lus10028172	298.667	242.333	334.948	782.062	296.333	257.667	351.228	533.688	Homeodomain-like superfamily protein	weakly similar to ( 142) AT1G58220 .g Symbols: .g myb family transcription factor .g chr1:21558388-21562669 REVERSEweakly similar to ( 102) loc_os02g34630 12002.m100229 protein myb-like DNA-binding domain containing protein, expressed no original description
Lus10009008	265.333	268.667	409.991	830.811	276	251.667	507.204	861.654	myb domain protein 4r1	moderately similar to ( 393) AT3G18100 .g Symbols: MYB4R1, AtMYB4R1 .g MYB4R1 (myb domain protein 4R1); transcription factor .g chr3:6200689-6204583 FORWARDmoderately similar to ( 326) loc_os07g04700 12007.m29056 protein MYB transcription factor, putative, expressed no original description
Lus10042871	276.333	223	341.495	971.547	275.333	220.667	347.09	604.952	Homeodomain-like superfamily protein	weakly similar to ( 142) AT1G58220 .g Symbols: .g myb family transcription factor .g chr1:21558388-21562669 REVERSEweakly similar to ( 101) loc_os02g34630 12002.m100229 protein myb-like DNA-binding domain containing protein, expressed no original description
Lus10036888	166.333	143.667	348.06	1079.36	146	126.667	322.596	546.707	0	weakly similar to ( 192) AT1G26580 .g Symbols: .g FUNCTIONS IN: molecular_function unknown; INVOLVED IN: biological_process unknown; LOCATED IN: cellular_component unknown; EXPRESSED IN: 24 plant structures; EXPRESSED DURING: 15 growth stages; BEST Arabidopsis thaliana protein match is: myb family transcription factor / ELM2 domain-containing protein (TAIR:AT2G03470.1); Has 82 Blast hits to 82 pr…
Lus10026142	415.333	430	932.379	1127.51	381.333	463	672.656	1339.48	myb domain protein 65	moderately similar to ( 345) AT3G11440 .g Symbols: ATMYB65, MYB65 .g MYB65 (MYB DOMAIN PROTEIN 65); DNA binding / transcription factor .g chr3:3603056-3604929 FORWARDmoderately similar to ( 317) GAM1_ORYSA Transcription factor GAMYB (OsGAMyb) - Oryza sativa (Rice)moderately similar to ( 379) loc_os10g10990 12010.m21777 protein transcription initiation factor IIF, alpha subunit, putative, expresse…
Lus10041145	25.3333	387.667	113.099	1135.49	84.6667	490.667	70.5385	402.866	myb domain protein 15	moderately similar to ( 221) AT3G23250 .g Symbols: MYB15, ATY19, ATMYB15 .g MYB15 (MYB DOMAIN PROTEIN 15); DNA binding / transcription factor .g chr3:8309742-8310624 FORWARDmoderately similar to ( 215) MYB4_ORYSA Myb-related protein Myb4 (OsMyb4) (Transcription factor RLTR1) - Oryza sativa (Rice)moderately similar to ( 215) loc_os04g43680 12004.m09327 protein myb-related protein Myb4, putative, e…
Lus10010273	2	1.33333	1.04777	1228.38	4.33333	1.33333	1.38036	835.577	myb domain protein 12	moderately similar to ( 212) AT2G47460 .g Symbols: MYB12, ATMYB12, PFG1 .g MYB12 (MYB DOMAIN PROTEIN 12); DNA binding / transcription activator/ transcription factor .g chr2:19476438-19479242 FORWARDmoderately similar to ( 213) MYBP_MAIZE Myb-related protein P - Zea mays (Maize)weakly similar to ( 194) loc_os03g19120 12003.m07329 protein yellow seed1, putative no original description
Lus10010260	2580	1781.67	1251.99	1299.59	3080	2011	1064.26	2306.23	myb domain protein r1	moderately similar to ( 241) AT4G37260 .g Symbols: MYB73, ATMYB73 .g MYB73 (MYB DOMAIN PROTEIN 73); DNA binding / transcription factor .g chr4:17540602-17541564 FORWARDweakly similar to ( 109) GAM1_ORYSA Transcription factor GAMYB (OsGAMyb) - Oryza sativa (Rice)weakly similar to ( 196) loc_os09g01960 12009.m03570 protein sucrose responsive element binding protein, putative, expressed REB1 no orig…
Lus10013816	375.667	339	499.186	1360.26	475	381.667	373.063	810.079	TSL-kinase interacting protein 1	highly similar to ( 622) AT2G36960 .g Symbols: TKI1 .g TKI1 (TSL-kinase interacting protein 1); DNA binding / transcription factor .g chr2:15523552-15527245 FORWARDmoderately similar to ( 486) loc_os03g13790 12003.m101263 protein TKI1, putative, expressed no original description
Lus10009636	225.333	244	223.437	1819.88	213	246.333	255.902	1316.01	myb domain protein 4r1	moderately similar to ( 434) AT3G18100 .g Symbols: MYB4R1, AtMYB4R1 .g MYB4R1 (myb domain protein 4R1); transcription factor .g chr3:6200689-6204583 FORWARDmoderately similar to ( 384) loc_os07g04700 12007.m29056 protein MYB transcription factor, putative, expressed no original description
Lus10041413	1070.33	645.667	2291.66	1975.01	1146	625.333	1551.05	1575.38	Duplicated homeodomain-like superfamily protein	moderately similar to ( 462) AT3G52250 .g Symbols: .g DNA binding / transcription factor .g chr3:19376629-19383100 FORWARDmoderately similar to ( 334) loc_os05g03550 12005.m04889 protein myb-like DNA-binding domain containing protein, expressed no original description
Lus10031758	16	117	10.1243	1995.75	11	138.333	12.8048	726.979	myb domain protein 63	weakly similar to ( 169) AT1G16490 .g Symbols: ATMYB58, MYB58 .g MYB58 (MYB DOMAIN PROTEIN 58); DNA binding / transcription activator/ transcription factor .g chr1:5629859-5630844 REVERSEweakly similar to ( 169) MYB1_MAIZE Myb-related protein Zm1 - Zea mays (Maize)weakly similar to ( 175) loc_os04g50770 12004.m09974 protein myb-related protein Zm1, putative, expressed no original description
Lus10008685	155.333	189.667	285.047	2020.4	139.333	165	189.675	4169.02	myb domain protein 65	moderately similar to ( 335) AT3G11440 .g Symbols: ATMYB65, MYB65 .g MYB65 (MYB DOMAIN PROTEIN 65); DNA binding / transcription factor .g chr3:3603056-3604929 FORWARDmoderately similar to ( 310) GAM1_ORYSA Transcription factor GAMYB (OsGAMyb) - Oryza sativa (Rice)moderately similar to ( 310) loc_os01g59660 12001.m42740 protein transcription factor GAMYB, putative, expressed REB1 no original descr…
Lus10014557	1	1	1.04777	2120.37	1	1	3.11546	2004.66	myb domain protein 24	weakly similar to ( 200) AT3G27810 .g Symbols: ATMYB21, ATMYB3, MYB21 .g ATMYB21 (ARABIDOPSIS THALIANA MYB DOMAIN PROTEIN 21); DNA binding / transcription factor .g chr3:10307596-10310093 FORWARDweakly similar to ( 150) GAM1_ORYSA Transcription factor GAMYB (OsGAMyb) - Oryza sativa (Rice)weakly similar to ( 198) loc_os07g48870 12007.m09096 protein typical P-type R2R3 Myb protein, putative, expres…
Lus10037097	291.667	205	544.92	2162.17	278.333	225.667	572.523	822.782	0	weakly similar to ( 187) AT1G26580 .g Symbols: .g FUNCTIONS IN: molecular_function unknown; INVOLVED IN: biological_process unknown; LOCATED IN: cellular_component unknown; EXPRESSED IN: 24 plant structures; EXPRESSED DURING: 15 growth stages; BEST Arabidopsis thaliana protein match is: myb family transcription factor / ELM2 domain-containing protein (TAIR:AT2G03470.1); Has 82 Blast hits to 82 pr…
Lus10033738	64.6667	26.6667	31.0346	2461.73	69.6667	31	125.244	1468.22	myb domain protein 41	weakly similar to ( 177) AT4G28110 .g Symbols: AtMYB41 .g AtMYB41 (myb domain protein 41); DNA binding / transcription factor .g chr4:13968166-13969384 REVERSEweakly similar to ( 167) MYB4_ORYSA Myb-related protein Myb4 (OsMyb4) (Transcription factor RLTR1) - Oryza sativa (Rice)weakly similar to ( 179) loc_os08g37970 12008.m07782 protein myb-like DNA-binding domain containing protein, expressed n…
Lus10023504	923.667	651	1938.55	2492.69	931	579.667	1188.14	2033.71	Duplicated homeodomain-like superfamily protein	moderately similar to ( 496) AT3G52250 .g Symbols: .g DNA binding / transcription factor .g chr3:19376629-19383100 FORWARDmoderately similar to ( 283) loc_os05g03550 12005.m04889 protein myb-like DNA-binding domain containing protein, expressed no original description
Lus10032129	1	1	11.1519	2660.89	1	1	14.5065	1394.12	myb domain protein 24	weakly similar to ( 197) AT5G40350 .g Symbols: MYB24, AtMYB24 .g MYB24 (myb domain protein 24); DNA binding / transcription factor .g chr5:16138703-16140946 REVERSEweakly similar to ( 153) GAM1_ORYSA Transcription factor GAMYB (OsGAMyb) - Oryza sativa (Rice)weakly similar to ( 192) loc_os07g48870 12007.m09096 protein typical P-type R2R3 Myb protein, putative, expressed no original description
Lus10036515	894	513.667	1878.73	2669.35	859.333	563.667	1582.9	2226.51	Duplicated homeodomain-like superfamily protein	moderately similar to ( 340) AT3G52250 .g Symbols: .g DNA binding / transcription factor .g chr3:19376629-19383100 FORWARDmoderately similar to ( 322) loc_os05g03550 12005.m04889 protein myb-like DNA-binding domain containing protein, expressed no original description
Lus10026655	341	241.333	613.219	2722.65	315.333	282	602.999	1265.73	0	moderately similar to ( 207) AT1G26580 .g Symbols: .g FUNCTIONS IN: molecular_function unknown; INVOLVED IN: biological_process unknown; LOCATED IN: cellular_component unknown; EXPRESSED IN: 24 plant structures; EXPRESSED DURING: 15 growth stages; BEST Arabidopsis thaliana protein match is: myb family transcription factor / ELM2 domain-containing protein (TAIR:AT2G03470.1); Has 82 Blast hits to 8…
Lus10021185	175	1067	198.903	2897.31	315.333	1189	126.779	926.516	myb domain protein 15	moderately similar to ( 216) AT3G23250 .g Symbols: MYB15, ATY19, ATMYB15 .g MYB15 (MYB DOMAIN PROTEIN 15); DNA binding / transcription factor .g chr3:8309742-8310624 FORWARDmoderately similar to ( 212) MYB4_ORYSA Myb-related protein Myb4 (OsMyb4) (Transcription factor RLTR1) - Oryza sativa (Rice)moderately similar to ( 214) loc_os02g41510 12002.m09187 protein myb-related protein Myb4, putative, e…
Lus10008616	214.333	14.6667	113.046	3001.08	114.667	13.3333	163.254	909.2	myb domain protein 94	moderately similar to ( 262) AT5G62470 .g Symbols: MYB96 .g MYB96 (myb domain protein 96); DNA binding / transcription factor .g chr5:25079434-25080858 REVERSEweakly similar to ( 176) MYB4_ORYSA Myb-related protein Myb4 (OsMyb4) (Transcription factor RLTR1) - Oryza sativa (Rice)moderately similar to ( 243) loc_os09g24800 12009.m05634 protein myb-related protein Myb4, putative REB1 no original des…
Lus10022259	1.33333	1	7.31684	3261.61	1	1	7.25299	602.339	myb domain protein 21	moderately similar to ( 220) AT3G27810 .g Symbols: ATMYB21, ATMYB3, MYB21 .g ATMYB21 (ARABIDOPSIS THALIANA MYB DOMAIN PROTEIN 21); DNA binding / transcription factor .g chr3:10307596-10310093 FORWARDweakly similar to ( 149) MYB38_MAIZE Myb-related protein Zm38 - Zea mays (Maize)weakly similar to ( 198) loc_os05g04210 12005.m04954 protein cpm5, putative, expressed no original description
Lus10004658	343.333	258.667	632.308	3593.81	327	281.333	696.692	1899.01	0	weakly similar to ( 195) AT1G26580 .g Symbols: .g FUNCTIONS IN: molecular_function unknown; INVOLVED IN: biological_process unknown; LOCATED IN: cellular_component unknown; EXPRESSED IN: 24 plant structures; EXPRESSED DURING: 15 growth stages; BEST Arabidopsis thaliana protein match is: myb family transcription factor / ELM2 domain-containing protein (TAIR:AT2G03470.1); Has 82 Blast hits to 82 pr…
Lus10033737	13	1	18.4962	4321.69	13.3333	1.33333	19.9884	3739.33	MYB-like 102	weakly similar to ( 160) AT4G34990 .g Symbols: AtMYB32 .g AtMYB32 (myb domain protein 32); DNA binding / transcription factor .g chr4:16661370-16662289 REVERSEweakly similar to ( 161) MYB38_MAIZE Myb-related protein Zm38 - Zea mays (Maize)weakly similar to ( 169) loc_os10g33810 12010.m06210 protein myb-related protein Myb4, putative, expressed no original description
Lus10004043	31.3333	51.3333	156.183	5182.88	49.6667	65	129.494	3319.81	myb domain protein 20	moderately similar to ( 249) AT1G66230 .g Symbols: MYB20, AtMYB20 .g MYB20 (myb domain protein 20); DNA binding / transcription factor .g chr1:24677322-24678246 FORWARDmoderately similar to ( 235) ODO1_PETHY ODORANT1 protein (MYB-like protein ODO1) - Petunia hybrida (Petunia)moderately similar to ( 243) loc_os06g14670 12006.m06182 protein odorant 1 protein, putative, expressed no original descrip…
Lus10009996	1	15.6667	3.14774	6045.49	1	15.3333	1.03726	7140.32	myb domain protein 2	moderately similar to ( 211) AT2G47190 .g Symbols: ATMYB2, MYB2 .g MYB2 (MYB DOMAIN PROTEIN 2); DNA binding / calmodulin binding / transcription activator/ transcription factor .g chr2:19376284-19377297 FORWARDweakly similar to ( 152) GAM1_ORYSA Transcription factor GAMYB (OsGAMyb) - Oryza sativa (Rice)moderately similar to ( 221) loc_os03g20090 12003.m101325 protein MYB transcription factor, put…
Lus10013081	1.33333	1	13.9558	6424.81	1	1	13.8313	1514.91	myb domain protein 21	weakly similar to ( 170) AT3G27810 .g Symbols: ATMYB21, ATMYB3, MYB21 .g ATMYB21 (ARABIDOPSIS THALIANA MYB DOMAIN PROTEIN 21); DNA binding / transcription factor .g chr3:10307596-10310093 FORWARDweakly similar to ( 134) MYBA2_ORYSA Myb-related protein MYBAS2 - Oryza sativa (Rice)weakly similar to ( 167) loc_os03g20090 12003.m101325 protein MYB transcription factor, putative, expressed no original…
Lus10040386	1223	793.333	3451.04	7101.53	1248	782.667	3029.19	3815.83	Duplicated homeodomain-like superfamily protein	highly similar to ( 501) AT3G52250 .g Symbols: .g DNA binding / transcription factor .g chr3:19376629-19383100 FORWARDmoderately similar to ( 288) loc_os05g03550 12005.m04889 protein myb-like DNA-binding domain containing protein, expressed no original description
Lus10006740	66.3333	3.33333	1476.04	8946.57	58.3333	8	2963.14	8942.31	MYB-like 102	moderately similar to ( 280) AT4G21440 .g Symbols: ATMYB102, ATM4 .g ATMYB102 (ARABIDOPSIS MYB-LIKE 102); DNA binding / transcription factor .g chr4:11418425-11419652 REVERSEmoderately similar to ( 201) ODO1_PETHY ODORANT1 protein (MYB-like protein ODO1) - Petunia hybrida (Petunia)moderately similar to ( 255) loc_os07g37210 12007.m07971 protein MYB transcription factor, putative, expressed REB1 n…
Lus10003557	165.333	1897.67	658.918	9299.28	182.333	1727.33	615.492	8061.42	myb domain protein 15	moderately similar to ( 214) AT1G06180 .g Symbols: ATMYB13, ATMYBLFGN .g ATMYB13 (MYB DOMAIN PROTEIN 13); DNA binding / transcription factor .g chr1:1889510-1891089 FORWARDmoderately similar to ( 217) MYB4_ORYSA Myb-related protein Myb4 (OsMyb4) (Transcription factor RLTR1) - Oryza sativa (Rice)moderately similar to ( 217) loc_os04g43680 12004.m09327 protein myb-related protein Myb4, putative, ex…
Lus10002296	13	18.3333	107.516	11466.4	19.3333	20.6667	75.7024	6779.08	myb domain protein 20	moderately similar to ( 246) AT1G66230 .g Symbols: MYB20, AtMYB20 .g MYB20 (myb domain protein 20); DNA binding / transcription factor .g chr1:24677322-24678246 FORWARDmoderately similar to ( 229) ODO1_PETHY ODORANT1 protein (MYB-like protein ODO1) - Petunia hybrida (Petunia)moderately similar to ( 239) loc_os06g14670 12006.m06182 protein odorant 1 protein, putative, expressed no original descrip…
Lus10011820	219.333	1513.67	1581.93	13382.7	291	1709.67	1812.83	5950.31	myb domain protein 15	moderately similar to ( 209) AT3G23250 .g Symbols: MYB15, ATY19, ATMYB15 .g MYB15 (MYB DOMAIN PROTEIN 15); DNA binding / transcription factor .g chr3:8309742-8310624 FORWARDmoderately similar to ( 209) MYB4_ORYSA Myb-related protein Myb4 (OsMyb4) (Transcription factor RLTR1) - Oryza sativa (Rice)moderately similar to ( 214) loc_os10g33810 12010.m06210 protein myb-related protein Myb4, putative, e…
Lus10042200	126	8.66667	58.277	25172.6	105.333	13.3333	68.757	14772.9	myb domain protein 96	moderately similar to ( 277) AT3G47600 .g Symbols: MYB94, ATMYBCP70, ATMYB94 .g ATMYB94 (MYB DOMAIN PROTEIN 94); DNA binding / transcription factor .g chr3:17539627-17541035 REVERSEweakly similar to ( 178) MYB4_ORYSA Myb-related protein Myb4 (OsMyb4) (Transcription factor RLTR1) - Oryza sativa (Rice)moderately similar to ( 258) loc_os08g33940 12008.m07384 protein MYB96, putative, expressed REB1 n…
Lus10038062	1	31	1.04777	41690.6	1.33333	31	1.3822	25116.8	myb domain protein 2	moderately similar to ( 212) AT1G48000 .g Symbols: MYB112, AtMYB112 .g MYB112 (myb domain protein 112); DNA binding / transcription factor .g chr1:17704269-17706377 REVERSEweakly similar to ( 148) GAM1_ORYSA Transcription factor GAMYB (OsGAMyb) - Oryza sativa (Rice)moderately similar to ( 221) loc_os07g48870 12007.m09096 protein typical P-type R2R3 Myb protein, putative, expressed no original des…
Lus10017096	11.6667	193.667	606.191	90394.7	9	240	499.199	49635	myb domain protein 108	moderately similar to ( 253) AT3G06490 .g Symbols: MYB108, AtMYB108, BOS1 .g MYB108 (myb domain protein 108); DNA binding / transcription factor .g chr3:2004298-2006358 FORWARDweakly similar to ( 149) MYB2_PHYPA Myb-related protein Pp2 - Physcomitrella patens (Moss)moderately similar to ( 258) loc_os07g48870 12007.m09096 protein typical P-type R2R3 Myb protein, putative, expressed no original des…
Lus10037818	40.6667	506.667	1395.47	189099	54.6667	665	1288.47	92673.3	myb domain protein 108	moderately similar to ( 250) AT3G06490 .g Symbols: MYB108, AtMYB108, BOS1 .g MYB108 (myb domain protein 108); DNA binding / transcription factor .g chr3:2004298-2006358 FORWARDweakly similar to ( 150) MYBA2_ORYSA Myb-related protein MYBAS2 - Oryza sativa (Rice)moderately similar to ( 261) loc_os07g48870 12007.m09096 protein typical P-type R2R3 Myb protein, putative, expressed no original descript…

## Sheet: WRKY
	M−Fn−L	M−Fn−R	S−Fn−L	S−Fn−R	M−Ly−L	M−Ly−R	S−Ly−L	S−Ly−R	annotation	Mapman
Lus10036401	5	25	3.84921	1.12174	2	26.3333	4.8578	8.89182	WRKY DNA-binding protein 56	weakly similar to ( 157) AT1G64000 .g Symbols: WRKY56, ATWRKY56 .g WRKY56; transcription factor .g chr1:23747434-23748883 FORWARDweakly similar to ( 161) loc_os01g53260 12001.m11495 protein OsWRKY23 - Superfamily of rice TFs having WRKY and zinc finger domains, expressedWRKY no original description
Lus10024380	85.3333	4.33333	26.5934	1.12174	61	4	12.455	1.04765	WRKY DNA-binding protein 49	weakly similar to ( 140) AT5G43290 .g Symbols: WRKY49, ATWRKY49 .g WRKY49; transcription factor .g chr5:17371987-17373083 REVERSEweakly similar to ( 128) loc_os01g74140 12001.m13441 protein OsWRKY17 - Superfamily of rice TFs having WRKY and zinc finger domains, expressedWRKY no original description
Lus10003894	90.6667	8.33333	13.6262	1.12174	90.6667	8.66667	16.9087	5.49771	WRKY family transcription factor	weakly similar to ( 185) AT4G11070 .g Symbols: WRKY41, AtWRKY41 .g WRKY41; transcription factor .g chr4:6759303-6760763 FORWARDweakly similar to ( 131) loc_os08g29660 12008.m06969 protein OsWRKY69 - Superfamily of rice TFs having WRKY and zinc finger domains, expressedWRKY no original description
Lus10020832	10.3333	30.6667	20.9671	2.58253	6	35	16.9679	38.7469	WRKY DNA-binding protein 13	weakly similar to ( 146) AT4G39410 .g Symbols: WRKY13, ATWRKY13 .g WRKY13; transcription factor .g chr4:18332937-18334789 REVERSEweakly similar to ( 146) loc_os01g08710 12001.m07496 protein OsWRKY79 - Superfamily of rice TFs having WRKY and zinc finger domains, expressedWRKY no original description
Lus10005428	276.667	191	58.7289	3.75704	337.667	191	43.7178	33.964	WRKY DNA-binding protein 65	weakly similar to ( 166) AT1G29280 .g Symbols: WRKY65, ATWRKY65 .g WRKY65; transcription factor .g chr1:10236589-10237467 FORWARDweakly similar to ( 121) loc_os01g53040 12001.m11476 protein OsWRKY14 - Superfamily of rice TFs having WRKY and zinc finger domains, expressedWRKY no original description
Lus10036800	98	107.333	298.847	14.8031	95	80.6667	234.534	41.1929	WRKY DNA-binding protein 3	moderately similar to ( 298) AT1G13960 .g Symbols: WRKY4 .g WRKY4; DNA binding / transcription factor .g chr1:4776622-4779043 FORWARDmoderately similar to ( 250) loc_os12g32250 12012.m07031 protein SPF1-like DNA-binding protein, putative, expressedWRKY no original description
Lus10042538	9	114	6.29549	22.2762	16	106.333	4.14717	32.4715	WRKY DNA-binding protein 74	moderately similar to ( 256) AT5G28650 .g Symbols: WRKY74, ATWRKY74 .g WRKY74; calmodulin binding / transcription factor .g chr5:10677790-10678945 REVERSEmoderately similar to ( 204) loc_os12g40570 12012.m07841 protein WRKY transcription factor 21, putative, expressedWRKY no original description
Lus10022278	115.333	5.33333	100.949	24.1291	83	8.66667	173.186	4.13351	WRKY DNA-binding protein 33	weakly similar to ( 108) AT2G38470 .g Symbols: WRKY33, ATWRKY33 .g WRKY33; transcription factor .g chr2:16108476-16110539 FORWARDweakly similar to ( 108) loc_os01g61080 12001.m12235 protein OsWRKY24 - Superfamily of rice TFs having WRKY and zinc finger domains, expressedWRKY no original description
Lus10012547	3.66667	10.6667	6.98359	27.512	3.66667	7.66667	2.07025	42.7814	WRKY DNA-binding protein 75	weakly similar to ( 159) AT5G13080 .g Symbols: WRKY75, ATWRKY75 .g WRKY75; transcription factor .g chr5:4149928-4151019 REVERSEweakly similar to ( 164) loc_os11g29870 12011.m06896 protein OsWRKY72 - Superfamily of rice TFs having WRKY and zinc finger domains, expressedWRKY no original description
Lus10036624	39	2.33333	61.5161	28.6324	60.3333	2	33.6927	16.4851	WRKY DNA-binding protein 50	weakly similar to ( 121) AT5G26170 .g Symbols: WRKY50, ATWRKY50 .g WRKY50; transcription factor .g chr5:9147176-9148128 REVERSEweakly similar to ( 128) loc_os05g09020 12005.m27728 protein OsWRKY67 - Superfamily of rice TFs having WRKY and zinc finger domains, expressedWRKY no original description
Lus10015229	426	272.667	133.508	30.1203	405.333	250.333	75.845	81.398	WRKY DNA-binding protein 65	weakly similar to ( 166) AT1G29280 .g Symbols: WRKY65, ATWRKY65 .g WRKY65; transcription factor .g chr1:10236589-10237467 FORWARDweakly similar to ( 117) loc_os01g54600 12001.m11623 protein OsWRKY13 - Superfamily of rice TFs having WRKY and zinc finger domains, expressedWRKY no original description
Lus10032580	107	207	31.7999	30.7987	114	164	24.5003	69.9056	WRKY family transcription factor family protein	moderately similar to ( 322) AT4G26640 .g Symbols: WRKY20, AtWRKY20 .g WRKY20; transcription factor .g chr4:13437298-13440693 REVERSEmoderately similar to ( 264) loc_os07g39480 12007.m08190 protein OsWRKY78 - Superfamily of rice TFs having WRKY and zinc finger domains, expressedWRKY no original description
Lus10022150	190.333	176	227.372	31.6711	154.333	191	180.465	80.0081	WRKY DNA-binding protein 32	moderately similar to ( 326) AT4G30935 .g Symbols: WRKY32, ATWRKY32 .g WRKY32; transcription factor .g chr4:15051916-15053908 REVERSEweakly similar to ( 156) loc_os08g17400 12008.m05859 protein WRKY transcription factor 4, putative, expressedWRKY no original description
Lus10043167	98.3333	225	31.8332	54.2594	95.3333	218.667	22.4911	123.701	WRKY family transcription factor family protein	moderately similar to ( 368) AT4G26640 .g Symbols: WRKY20, AtWRKY20 .g WRKY20; transcription factor .g chr4:13437298-13440693 REVERSEmoderately similar to ( 293) loc_os07g39480 12007.m08190 protein OsWRKY78 - Superfamily of rice TFs having WRKY and zinc finger domains, expressedWRKY no original description
Lus10018776	88.3333	166.667	66.757	81.3858	70.6667	172	68.0214	182.115	WRKY DNA-binding protein 21	moderately similar to ( 210) AT2G30590 .g Symbols: WRKY21 .g WRKY21; calmodulin binding / transcription factor .g chr2:13033891-13035303 FORWARDmoderately similar to ( 211) loc_os12g40570 12012.m07841 protein WRKY transcription factor 21, putative, expressedWRKY no original description
Lus10036268	218.667	204	186.603	84.2385	237.667	221.333	122.424	109.145	WRKY DNA-binding protein 32	moderately similar to ( 320) AT4G30935 .g Symbols: WRKY32, ATWRKY32 .g WRKY32; transcription factor .g chr4:15051916-15053908 REVERSEweakly similar to ( 162) loc_os08g17400 12008.m05859 protein WRKY transcription factor 4, putative, expressedWRKY no original description
Lus10035971	334.667	83.6667	7.32554	89.1221	57	64.3333	32.4244	12.8293	WRKY DNA-binding protein 9	weakly similar to ( 156) AT1G68150 .g Symbols: WRKY9, ATWRKY9 .g WRKY9; transcription factor .g chr1:25543970-25545615 FORWARDweakly similar to ( 154) loc_os02g53100 12002.m100815 protein OsWRKY32 - Superfamily of rice TFs having WRKY and zinc finger domains, expressedWRKY no original description
Lus10038426	7.33333	75	233.024	114.04	5	75.6667	369.215	97.2884	WRKY DNA-binding protein 35	moderately similar to ( 216) AT2G34830 .g Symbols: WRKY35, MEE24, AtWRKY35 .g WRKY35 (WRKY DNA-binding protein 35); transcription factor .g chr2:14693839-14696378 REVERSEmoderately similar to ( 205) loc_os04g50920 12004.m09989 protein WRKY DNA binding domain containing protein, expressedWRKY no original description
Lus10006848	104	4	47.1893	115.531	162.667	2.66667	40.1821	14.0888	WRKY DNA-binding protein 50	weakly similar to ( 124) AT5G26170 .g Symbols: WRKY50, ATWRKY50 .g WRKY50; transcription factor .g chr5:9147176-9148128 REVERSEweakly similar to ( 126) loc_os05g46020 12005.m08727 protein OsWRKY7 - Superfamily of rice TFs having WRKY and zinc finger domains, expressedWRKY no original description
Lus10029022	2	2.33333	2.4427	116.737	2.33333	1	2.08487	112.416	WRKY DNA-binding protein 55	weakly similar to ( 144) AT2G40740 .g Symbols: WRKY55, ATWRKY55 .g WRKY55; transcription factor .g chr2:16997177-16999276 FORWARDweakly similar to ( 124) loc_os05g25700 12005.m06863 protein OsWRKY75 - Superfamily of rice TFs having WRKY and zinc finger domains, expressedWRKY no original description
Lus10016682	25.6667	65.3333	128.497	121.124	8.66667	73.6667	203.081	85.5069	WRKY DNA-binding protein 9	weakly similar to ( 159) AT1G68150 .g Symbols: WRKY9, ATWRKY9 .g WRKY9; transcription factor .g chr1:25543970-25545615 FORWARDweakly similar to ( 144) loc_os02g53100 12002.m100815 protein OsWRKY32 - Superfamily of rice TFs having WRKY and zinc finger domains, expressedWRKY no original description
Lus10021999	7	40.6667	1.39586	146.535	5.33333	41.6667	2.41335	130.206	WRKY DNA-binding protein 74	moderately similar to ( 261) AT5G28650 .g Symbols: WRKY74, ATWRKY74 .g WRKY74; calmodulin binding / transcription factor .g chr5:10677790-10678945 REVERSEmoderately similar to ( 206) loc_os12g40570 12012.m07841 protein WRKY transcription factor 21, putative, expressedWRKY no original description
Lus10014745	414.667	636.333	79.3664	152.17	381	578.333	59.8681	278.034	WRKY DNA-binding protein 39	moderately similar to ( 235) AT2G30590 .g Symbols: WRKY21 .g WRKY21; calmodulin binding / transcription factor .g chr2:13033891-13035303 FORWARDmoderately similar to ( 232) loc_os12g40570 12012.m07841 protein WRKY transcription factor 21, putative, expressedWRKY no original description
Lus10033857	352.667	610.667	279.262	176.561	331.667	628.333	212.45	465.924	WRKY DNA-binding protein 39	moderately similar to ( 238) AT2G30590 .g Symbols: WRKY21 .g WRKY21; calmodulin binding / transcription factor .g chr2:13033891-13035303 FORWARDmoderately similar to ( 233) loc_os12g40570 12012.m07841 protein WRKY transcription factor 21, putative, expressedWRKY no original description
Lus10016595	355.667	460.333	357.934	178.06	327	407	367.255	256.587	WRKY family transcription factor family protein	moderately similar to ( 474) AT4G26640 .g Symbols: WRKY20, AtWRKY20 .g WRKY20; transcription factor .g chr4:13437298-13440693 REVERSEmoderately similar to ( 373) loc_os07g39480 12007.m08190 protein OsWRKY78 - Superfamily of rice TFs having WRKY and zinc finger domains, expressedWRKY no original description
Lus10019898	6.66667	7.33333	515.824	180.81	8	5.33333	528.451	164.684	WRKY DNA-binding protein 2	weakly similar to ( 194) AT2G03340 .g Symbols: WRKY3 .g WRKY3; transcription factor .g chr2:1014724-1016936 REVERSEweakly similar to ( 191) loc_os12g32250 12012.m07031 protein SPF1-like DNA-binding protein, putative, expressedWRKY no original description
Lus10037131	240	344	119.532	198.506	370.333	309	114.755	210.893	WRKY DNA-binding protein 3	moderately similar to ( 316) AT2G03340 .g Symbols: WRKY3 .g WRKY3; transcription factor .g chr2:1014724-1016936 REVERSEmoderately similar to ( 252) loc_os12g32250 12012.m07031 protein SPF1-like DNA-binding protein, putative, expressedWRKY no original description
Lus10027538	2.33333	67.3333	24.4524	227.42	8	91.6667	14.9183	286.978	WRKY DNA-binding protein 27	weakly similar to ( 159) AT5G52830 .g Symbols: WRKY27, ATWRKY27 .g WRKY27; transcription factor .g chr5:21410996-21412218 FORWARDweakly similar to ( 146) loc_os02g16540 12002.m77729 protein OsWRKY39v2 - Superfamily of rice TFs having WRKY and zinc finger domains, expressedWRKY no original description
Lus10027139	732.333	502.333	1622.09	409.785	635.333	450.667	1534.4	399.954	WRKY DNA-binding protein 2	moderately similar to ( 434) AT5G56270 .g Symbols: WRKY2, ATWRKY2 .g WRKY2; transcription factor .g chr5:22780816-22783137 FORWARDmoderately similar to ( 353) loc_os08g38990 12008.m26522 protein OsWRKY30 - Superfamily of rice TFs having WRKY and zinc finger domains, expressedWRKY no original description
Lus10026634	298.667	290	792.957	420.583	567.667	329.667	878.618	542.838	WRKY DNA-binding protein 4	moderately similar to ( 305) AT2G03340 .g Symbols: WRKY3 .g WRKY3; transcription factor .g chr2:1014724-1016936 REVERSEmoderately similar to ( 242) loc_os12g32250 12012.m07031 protein SPF1-like DNA-binding protein, putative, expressedWRKY no original description
Lus10015377	320	211.667	438.22	474.343	242	191.667	365.401	332.52	WRKY DNA-binding protein 3	moderately similar to ( 291) AT2G03340 .g Symbols: WRKY3 .g WRKY3; transcription factor .g chr2:1014724-1016936 REVERSEmoderately similar to ( 258) loc_os12g32250 12012.m07031 protein SPF1-like DNA-binding protein, putative, expressedWRKY no original description
Lus10034245	1.66667	4.66667	2.79087	502.28	2	4.33333	1.73141	496.237	WRKY DNA-binding protein 55	very weakly similar to (90.5) AT2G40740 .g Symbols: WRKY55, ATWRKY55 .g WRKY55; transcription factor .g chr2:16997177-16999276 FORWARD no original description
Lus10033000	223.333	201.667	404.701	504.153	216.667	209.667	374.327	357.28	WRKY DNA-binding protein 3	moderately similar to ( 245) AT2G03340 .g Symbols: WRKY3 .g WRKY3; transcription factor .g chr2:1014724-1016936 REVERSEmoderately similar to ( 202) loc_os12g32250 12012.m07031 protein SPF1-like DNA-binding protein, putative, expressedWRKY no original description
Lus10029252	136.667	584.333	778.877	505.517	149	622	483.076	561.312	WRKY DNA-binding protein 65	weakly similar to ( 154) AT1G29280 .g Symbols: WRKY65, ATWRKY65 .g WRKY65; transcription factor .g chr1:10236589-10237467 FORWARDweakly similar to ( 131) loc_os04g50920 12004.m09989 protein WRKY DNA binding domain containing protein, expressedWRKY no original description
Lus10023615	9.33333	142.667	29.3067	583.898	7	152.333	15.5753	252.513	WRKY DNA-binding protein 72	weakly similar to ( 140) AT5G15130 .g Symbols: WRKY72, ATWRKY72 .g WRKY72; transcription factor .g chr5:4904426-4906879 FORWARDweakly similar to ( 160) loc_os06g05380 12006.m91873 protein OsWRKY73 - Superfamily of rice TFs having WRKY and zinc finger domains, expressedWRKY no original description
Lus10026838	26.6667	33.6667	27.5776	603.798	42.6667	39.6667	63.2266	114.294	WRKY DNA-binding protein 2	moderately similar to ( 280) AT5G56270 .g Symbols: WRKY2, ATWRKY2 .g WRKY2; transcription factor .g chr5:22780816-22783137 FORWARDmoderately similar to ( 267) loc_os08g38990 12008.m26522 protein OsWRKY30 - Superfamily of rice TFs having WRKY and zinc finger domains, expressedWRKY no original description
Lus10041546	8	130.667	22.0065	770.796	16.6667	127.667	18.7202	1187.66	WRKY DNA-binding protein 75	weakly similar to ( 158) AT5G13080 .g Symbols: WRKY75, ATWRKY75 .g WRKY75; transcription factor .g chr5:4149928-4151019 REVERSEweakly similar to ( 161) loc_os11g29870 12011.m06896 protein OsWRKY72 - Superfamily of rice TFs having WRKY and zinc finger domains, expressedWRKY no original description
Lus10032303	2	58	3.14246	876.881	2	75.6667	4.49525	569.554	WRKY family transcription factor	weakly similar to ( 120) AT5G52830 .g Symbols: WRKY27, ATWRKY27 .g WRKY27; transcription factor .g chr5:21410996-21412218 FORWARDweakly similar to ( 120) loc_os02g16540 12002.m77729 protein OsWRKY39v2 - Superfamily of rice TFs having WRKY and zinc finger domains, expressedWRKY no original description
Lus10039295	15	121	166.967	900.112	19.6667	136	110.444	933.868	WRKY DNA-binding protein 27	weakly similar to ( 155) AT5G52830 .g Symbols: WRKY27, ATWRKY27 .g WRKY27; transcription factor .g chr5:21410996-21412218 FORWARDweakly similar to ( 143) loc_os02g16540 12002.m77729 protein OsWRKY39v2 - Superfamily of rice TFs having WRKY and zinc finger domains, expressedWRKY no original description
Lus10012027	190.333	90.3333	358.122	1115.31	240.667	93	242.253	247.881	protein kinase family protein	very weakly similar to ( 100) AT3G01080 .g Symbols: WRKY58, ATWRKY58 .g WRKY58; transcription factor .g chr3:25507-27449 FORWARDweakly similar to ( 106) loc_os12g32250 12012.m07031 protein SPF1-like DNA-binding protein, putative, expressedWRKY no original description
Lus10012029	30.6667	33.3333	70.519	1143.92	28.3333	39	66.0868	67.8694	WRKY DNA-binding protein 4	very weakly similar to (98.6) AT2G03340 .g Symbols: WRKY3 .g WRKY3; transcription factor .g chr2:1014724-1016936 REVERSEweakly similar to ( 102) loc_os12g32250 12012.m07031 protein SPF1-like DNA-binding protein, putative, expressedWRKY no original description
Lus10037094	152.333	275.667	687.046	1245.82	145.667	257	475.804	821.089	WRKY DNA-binding protein 57	weakly similar to ( 161) AT1G69310 .g Symbols: WRKY57, ATWRKY57 .g WRKY57; transcription factor .g chr1:26056118-26057909 REVERSEweakly similar to ( 174) loc_os03g55080 12003.m10423 protein OsWRKY3 - Superfamily of rice TFs having WRKY and zinc finger domains, expressedWRKY no original description
Lus10022736	110	110.333	494.017	1484.45	194	152.333	136.528	664.711	WRKY DNA-binding protein 62	very weakly similar to (85.9) AT5G01900 .g Symbols: WRKY62, ATWRKY62 .g WRKY62; transcription factor .g chr5:351136-352013 REVERSEvery weakly similar to (90.1) loc_os12g02420 12012.m04243 protein WRKY transcription factor 70, putative, expressed no original description
Lus10029021	319.667	21.6667	325.34	1602.42	487	25.6667	229.066	691.063	WRKY DNA-binding protein 70	weakly similar to ( 137) AT3G56400 .g Symbols: WRKY70, ATWRKY70 .g WRKY70; transcription factor/ transcription repressor .g chr3:20909082-20910409 REVERSEweakly similar to ( 108) loc_os05g25770 12005.m06869 protein OsWRKY45 - Superfamily of rice TFs having WRKY and zinc finger domains, expressed no original description
Lus10012870	892	106.667	544.664	2042.2	1002.33	131	329.927	1095	WRKY DNA-binding protein 70	weakly similar to ( 124) AT3G56400 .g Symbols: WRKY70, ATWRKY70 .g WRKY70; transcription factor/ transcription repressor .g chr3:20909082-20910409 REVERSEvery weakly similar to (94.0) loc_os05g25770 12005.m06869 protein OsWRKY45 - Superfamily of rice TFs having WRKY and zinc finger domains, expressed no original description
Lus10034244	377	132.667	512.527	2066.76	481.333	113.667	287.81	1139.95	WRKY DNA-binding protein 70	weakly similar to ( 129) AT3G56400 .g Symbols: WRKY70, ATWRKY70 .g WRKY70; transcription factor/ transcription repressor .g chr3:20909082-20910409 REVERSEvery weakly similar to (98.2) loc_os05g25770 12005.m06869 protein OsWRKY45 - Superfamily of rice TFs having WRKY and zinc finger domains, expressed no original description
Lus10036399	76.3333	332	237.413	2103.73	108.667	384	174.079	1389.97	WRKY family transcription factor	weakly similar to ( 157) AT4G01250 .g Symbols: WRKY22, AtWRKY22 .g WRKY22; transcription factor .g chr4:522839-524129 REVERSEweakly similar to ( 137) loc_os02g16540 12002.m77729 protein OsWRKY39v2 - Superfamily of rice TFs having WRKY and zinc finger domains, expressedWRKY no original description
Lus10035841	383.333	100.667	480.32	2280.29	424.667	92	431.681	682.938	WRKY DNA-binding protein 51	weakly similar to ( 111) AT5G26170 .g Symbols: WRKY50, ATWRKY50 .g WRKY50; transcription factor .g chr5:9147176-9148128 REVERSEweakly similar to ( 117) loc_os05g46020 12005.m08727 protein OsWRKY7 - Superfamily of rice TFs having WRKY and zinc finger domains, expressedWRKY no original description
Lus10016282	194.667	188.667	427.14	2721.66	183.333	187.333	347.413	480.24	protein kinase family protein	weakly similar to ( 134) AT2G03340 .g Symbols: WRKY3 .g WRKY3; transcription factor .g chr2:1014724-1016936 REVERSEweakly similar to ( 139) loc_os03g33012 12003.m08540 protein WRKY transcription factor 4, putative, expressedWRKY no original description
Lus10036891	74.3333	166.667	71.5918	2991.32	69	146	66.5216	1078.67	WRKY DNA-binding protein 57	weakly similar to ( 172) AT1G69310 .g Symbols: WRKY57, ATWRKY57 .g WRKY57; transcription factor .g chr1:26056118-26057909 REVERSEweakly similar to ( 169) loc_os03g55080 12003.m10423 protein OsWRKY3 - Superfamily of rice TFs having WRKY and zinc finger domains, expressedWRKY no original description
Lus10007907	47	370.333	97.1504	3883.02	78.3333	454.667	81.0717	1878.26	WRKY family transcription factor	weakly similar to ( 171) AT4G01250 .g Symbols: WRKY22, AtWRKY22 .g WRKY22; transcription factor .g chr4:522839-524129 REVERSEweakly similar to ( 142) loc_os02g16540 12002.m77729 protein OsWRKY39v2 - Superfamily of rice TFs having WRKY and zinc finger domains, expressedWRKY no original description
Lus10017067	111	809.667	278.141	4424.14	155.333	914	401.325	2398.26	WRKY DNA-binding protein 48	weakly similar to ( 150) AT5G49520 .g Symbols: WRKY48, ATWRKY48 .g WRKY48; transcription factor .g chr5:20090890-20092867 FORWARDweakly similar to ( 144) loc_os01g47560 12001.m10951 protein OsWRKY16 - Superfamily of rice TFs having WRKY and zinc finger domains, expressedWRKY no original description
Lus10024676	6.33333	279.333	60.0611	4821.45	17.6667	355.667	46.5702	3932.36	WRKY family transcription factor	weakly similar to ( 147) AT5G52830 .g Symbols: WRKY27, ATWRKY27 .g WRKY27; transcription factor .g chr5:21410996-21412218 FORWARDweakly similar to ( 147) loc_os02g16540 12002.m77729 protein OsWRKY39v2 - Superfamily of rice TFs having WRKY and zinc finger domains, expressedWRKY no original description
Lus10030517	1006.67	526	462.217	4835.16	1387	670	398.716	1848.75	WRKY DNA-binding protein 70	weakly similar to ( 126) AT3G56400 .g Symbols: WRKY70, ATWRKY70 .g WRKY70; transcription factor/ transcription repressor .g chr3:20909082-20910409 REVERSEvery weakly similar to (95.1) loc_os05g25770 12005.m06869 protein OsWRKY45 - Superfamily of rice TFs having WRKY and zinc finger domains, expressed no original description
Lus10035286	661.667	443.333	2288.6	5031.31	688.333	453.333	1858.52	3067.54	WRKY family transcription factor	moderately similar to ( 242) AT1G62300 .g Symbols: WRKY6, ATWRKY6 .g WRKY6; transcription factor .g chr1:23016887-23019155 REVERSEmoderately similar to ( 230) loc_os01g14440 12001.m08049 protein OsWRKY1v2 - Superfamily of rice TFs having WRKY and zinc finger domains, expressedWRKY no original description
Lus10001902	78.6667	41	31.1275	5170.05	72.6667	45.6667	22.8129	6406.77	WRKY family transcription factor	weakly similar to ( 198) AT4G11070 .g Symbols: WRKY41, AtWRKY41 .g WRKY41; transcription factor .g chr4:6759303-6760763 FORWARDweakly similar to ( 142) loc_os08g29660 12008.m06969 protein OsWRKY69 - Superfamily of rice TFs having WRKY and zinc finger domains, expressedWRKY no original description
Lus10036725	1.33333	74	6.62493	5936.09	1.33333	92	1.7253	1534.53	WRKY DNA-binding protein 72	weakly similar to ( 157) AT5G15130 .g Symbols: WRKY72, ATWRKY72 .g WRKY72; transcription factor .g chr5:4904426-4906879 FORWARDweakly similar to ( 187) loc_os06g05380 12006.m91873 protein OsWRKY73 - Superfamily of rice TFs having WRKY and zinc finger domains, expressedWRKY no original description
Lus10037785	182.667	660.333	542.153	6752.02	217.667	647.333	585.529	3327.53	WRKY DNA-binding protein 48	weakly similar to ( 148) AT5G49520 .g Symbols: WRKY48, ATWRKY48 .g WRKY48; transcription factor .g chr5:20090890-20092867 FORWARDweakly similar to ( 142) loc_os01g47560 12001.m10951 protein OsWRKY16 - Superfamily of rice TFs having WRKY and zinc finger domains, expressedWRKY no original description
Lus10030040	544	798.667	3505.46	6820.78	540	733	1847.27	2939.33	WRKY family transcription factor	weakly similar to ( 159) AT4G04450 .g Symbols: WRKY42, AtWRKY42 .g WRKY42; transcription factor .g chr4:2218379-2221113 FORWARDweakly similar to ( 147) loc_os01g14440 12001.m08049 protein OsWRKY1v2 - Superfamily of rice TFs having WRKY and zinc finger domains, expressed no original description
Lus10037205	17	182.333	48.8383	16055	23.3333	207.333	33.947	6335.53	WRKY DNA-binding protein 72	weakly similar to ( 159) AT5G15130 .g Symbols: WRKY72, ATWRKY72 .g WRKY72; transcription factor .g chr5:4904426-4906879 FORWARDweakly similar to ( 180) loc_os06g05380 12006.m91873 protein OsWRKY73 - Superfamily of rice TFs having WRKY and zinc finger domains, expressedWRKY no original description
Lus10006261	791	1249	1689.49	17655.9	771	1202.67	1391.61	10725.2	WRKY DNA-binding protein 15	weakly similar to ( 185) AT2G23320 .g Symbols: WRKY15 .g WRKY15; calmodulin binding / transcription factor .g chr2:9924998-9925991 FORWARDweakly similar to ( 140) loc_os12g40570 12012.m07841 protein WRKY transcription factor 21, putative, expressedWRKY no original description
Lus10026936	679	1636.33	1128.32	20021.5	660.333	1675.33	1022.17	12818.1	WRKY DNA-binding protein 11	moderately similar to ( 342) AT4G31550 .g Symbols: WRKY11, ATWRKY11 .g WRKY11; calmodulin binding / transcription factor .g chr4:15290065-15291458 REVERSEmoderately similar to ( 242) loc_os04g21950 12004.m07345 protein OsWRKY51 - Superfamily of rice TFs having WRKY and zinc finger domains, expressedWRKY no original description
Lus10012030	165	272.333	574.343	23134	191.333	281.333	462.566	4624.89	protein kinase family protein	weakly similar to ( 134) AT2G03340 .g Symbols: WRKY3 .g WRKY3; transcription factor .g chr2:1014724-1016936 REVERSEweakly similar to ( 136) loc_os03g33012 12003.m08540 protein WRKY transcription factor 4, putative, expressedWRKY no original description
Lus10041600	1093.33	2200.33	1820.82	25336.8	1186.33	2198	1213.82	12843.7	WRKY DNA-binding protein 15	weakly similar to ( 190) AT2G23320 .g Symbols: WRKY15 .g WRKY15; calmodulin binding / transcription factor .g chr2:9924998-9925991 FORWARDweakly similar to ( 140) loc_os12g40570 12012.m07841 protein WRKY transcription factor 21, putative, expressedWRKY no original description
Lus10011346	229	212.333	3856.81	26347.6	219.667	182.667	4840.57	17164.7	WRKY DNA-binding protein 75	weakly similar to ( 163) AT5G13080 .g Symbols: WRKY75, ATWRKY75 .g WRKY75; transcription factor .g chr5:4149928-4151019 REVERSEweakly similar to ( 169) loc_os11g29870 12011.m06896 protein OsWRKY72 - Superfamily of rice TFs having WRKY and zinc finger domains, expressedWRKY no original description
Lus10004612	31.6667	233.667	437.301	26965.4	44	261.333	757.489	13505.3	WRKY DNA-binding protein 71	weakly similar to ( 141) AT1G29860 .g Symbols: WRKY71, ATWRKY71 .g WRKY71; transcription factor .g chr1:10454482-10455652 FORWARDweakly similar to ( 144) loc_os01g47560 12001.m10951 protein OsWRKY16 - Superfamily of rice TFs having WRKY and zinc finger domains, expressedWRKY no original description
Lus10010053	200.667	973	663.613	29003.4	204.333	1027.67	491.734	24739.9	WRKY DNA-binding protein 7	moderately similar to ( 205) AT4G24240 .g Symbols: WRKY7, ATWRKY7 .g WRKY7; calmodulin binding / transcription factor .g chr4:12571930-12573446 FORWARDweakly similar to ( 131) loc_os03g53050 12003.m101491 protein WRKY transcription factor 21, putative, expressedWRKY no original description
Lus10001062	7.33333	103	35.6015	29171.3	14.3333	87.6667	42.139	10644	WRKY family transcription factor	weakly similar to ( 145) AT4G11070 .g Symbols: WRKY41, AtWRKY41 .g WRKY41; transcription factor .g chr4:6759303-6760763 FORWARDweakly similar to ( 127) loc_os06g06360 12006.m05362 protein WRKY transcription factor 30, putative, expressedWRKY no original description
Lus10039331	37.6667	194.333	83.1245	29928.6	42.6667	253.333	96.6184	13564.9	WRKY family transcription factor	weakly similar to ( 150) AT4G11070 .g Symbols: WRKY41, AtWRKY41 .g WRKY41; transcription factor .g chr4:6759303-6760763 FORWARDweakly similar to ( 129) loc_os06g06360 12006.m05362 protein WRKY transcription factor 30, putative, expressedWRKY no original description
Lus10004537	54.6667	268	333.426	31047.2	63	254.667	512.57	13128.5	WRKY DNA-binding protein 71	weakly similar to ( 153) AT1G29860 .g Symbols: WRKY71, ATWRKY71 .g WRKY71; transcription factor .g chr1:10454482-10455652 FORWARDweakly similar to ( 153) loc_os01g47560 12001.m10951 protein OsWRKY16 - Superfamily of rice TFs having WRKY and zinc finger domains, expressedWRKY no original description
Lus10026409	574.667	923.333	1514.83	33030.9	916	1037.33	1637.76	11076.8	WRKY DNA-binding protein 33	weakly similar to ( 160) AT2G38470 .g Symbols: WRKY33, ATWRKY33 .g WRKY33; transcription factor .g chr2:16108476-16110539 FORWARDweakly similar to ( 178) loc_os01g61080 12001.m12235 protein OsWRKY24 - Superfamily of rice TFs having WRKY and zinc finger domains, expressedWRKY no original description
Lus10015546	59.6667	275	1929.04	33261.6	98.6667	318.333	3225.11	26063.7	WRKY family transcription factor	weakly similar to ( 181) AT4G04450 .g Symbols: WRKY42, AtWRKY42 .g WRKY42; transcription factor .g chr4:2218379-2221113 FORWARDweakly similar to ( 172) loc_os05g49210 12005.m08991 protein OsWRKY43 - Superfamily of rice TFs having WRKY and zinc finger domains, expressedWRKY no original description
Lus10020136	824.333	1485.33	1899.93	33941.3	911	1661.67	2380.27	16220.9	WRKY DNA-binding protein 11	moderately similar to ( 338) AT4G31550 .g Symbols: WRKY11, ATWRKY11 .g WRKY11; calmodulin binding / transcription factor .g chr4:15290065-15291458 REVERSEmoderately similar to ( 244) loc_os04g21950 12004.m07345 protein OsWRKY51 - Superfamily of rice TFs having WRKY and zinc finger domains, expressedWRKY no original description
Lus10002309	1158	2472.33	5945.58	39279.1	1670.33	2857.33	8502.26	33899.3	WRKY DNA-binding protein 40	moderately similar to ( 232) AT1G80840 .g Symbols: WRKY40, ATWRKY40 .g WRKY40; transcription factor .g chr1:30383834-30385356 FORWARDweakly similar to ( 154) loc_os09g25060 12009.m05659 protein OsWRKY76 - Superfamily of rice TFs having WRKY and zinc finger domains, expressedWRKY no original description
Lus10042243	2012	2286	7679.15	44431.2	2780.33	2416.67	7087.69	16813.6	WRKY DNA-binding protein 26	moderately similar to ( 265) AT2G38470 .g Symbols: WRKY33, ATWRKY33 .g WRKY33; transcription factor .g chr2:16108476-16110539 FORWARDmoderately similar to ( 294) loc_os01g61080 12001.m12235 protein OsWRKY24 - Superfamily of rice TFs having WRKY and zinc finger domains, expressedWRKY no original description
Lus10003128	106	647	1076.87	55341	99	632.667	1071.96	32169.5	WRKY DNA-binding protein 75	weakly similar to ( 158) AT5G13080 .g Symbols: WRKY75, ATWRKY75 .g WRKY75; transcription factor .g chr5:4149928-4151019 REVERSEweakly similar to ( 166) loc_os11g29870 12011.m06896 protein OsWRKY72 - Superfamily of rice TFs having WRKY and zinc finger domains, expressedWRKY no original description
Lus10026082	1202	3701	1605.4	62457.2	1987.67	4086	2791.61	33041	WRKY DNA-binding protein 40	moderately similar to ( 224) AT1G80840 .g Symbols: WRKY40, ATWRKY40 .g WRKY40; transcription factor .g chr1:30383834-30385356 FORWARDweakly similar to ( 156) loc_os09g25060 12009.m05659 protein OsWRKY76 - Superfamily of rice TFs having WRKY and zinc finger domains, expressedWRKY no original description
Lus10032372	958.333	1685.67	611.966	63023.6	1418.33	1807	592.826	27543.3	WRKY family transcription factor	moderately similar to ( 206) AT4G11070 .g Symbols: WRKY41, AtWRKY41 .g WRKY41; transcription factor .g chr4:6759303-6760763 FORWARDweakly similar to ( 142) loc_os08g29660 12008.m06969 protein OsWRKY69 - Superfamily of rice TFs having WRKY and zinc finger domains, expressedWRKY no original description
Lus10023099	940	1722	602.975	95959.7	1313.67	1875	559.166	48401.2	WRKY family transcription factor	moderately similar to ( 205) AT4G11070 .g Symbols: WRKY41, AtWRKY41 .g WRKY41; transcription factor .g chr4:6759303-6760763 FORWARDweakly similar to ( 142) loc_os08g29660 12008.m06969 protein OsWRKY69 - Superfamily of rice TFs having WRKY and zinc finger domains, expressedWRKY no original description
Lus10012215	649.667	1751	2336.85	192287	977.667	2044	1934.49	45990.9	WRKY DNA-binding protein 33	moderately similar to ( 293) AT2G38470 .g Symbols: WRKY33, ATWRKY33 .g WRKY33; transcription factor .g chr2:16108476-16110539 FORWARDmoderately similar to ( 303) loc_os01g61080 12001.m12235 protein OsWRKY24 - Superfamily of rice TFs having WRKY and zinc finger domains, expressedWRKY no original description
Lus10001265	843.333	2452	5623.01	197084	1250.67	2802.67	5497.83	66984.9	WRKY DNA-binding protein 33	moderately similar to ( 294) AT2G38470 .g Symbols: WRKY33, ATWRKY33 .g WRKY33; transcription factor .g chr2:16108476-16110539 FORWARDmoderately similar to ( 299) loc_os01g61080 12001.m12235 protein OsWRKY24 - Superfamily of rice TFs having WRKY and zinc finger domains, expressedWRKY no original description
Lus10041660	746.333	2404	289.623	240287	1359.33	2796.67	352.434	175642	WRKY DNA-binding protein 40	moderately similar to ( 228) AT1G80840 .g Symbols: WRKY40, ATWRKY40 .g WRKY40; transcription factor .g chr1:30383834-30385356 FORWARDweakly similar to ( 167) loc_os02g08440 12002.m33348 protein OsWRKY71 - Superfamily of rice TFs having WRKY and zinc finger domains, expressedWRKY no original description
Lus10024074	1132.33	3016.67	562.996	263922	2027	3340.33	600.137	150413	WRKY DNA-binding protein 40	moderately similar to ( 230) AT1G80840 .g Symbols: WRKY40, ATWRKY40 .g WRKY40; transcription factor .g chr1:30383834-30385356 FORWARDweakly similar to ( 166) loc_os02g08440 12002.m33348 protein OsWRKY71 - Superfamily of rice TFs having WRKY and zinc finger domains, expressedWRKY no original description

## Sheet: NAC
	M−Fn−L	M−Fn−R	S−Fn−L	S−Fn−R	M−Ly−L	M−Ly−R	S−Ly−L	S−Ly−R	annotation	Mapman
Lus10033699	1	1	1.04777	15.5394	1	1	1.03726	1.04765	NAC domain containing protein 46	no original description
Lus10013825	58.6667	75	28.3119	18.0899	53.3333	61	28.7082	19.9832	SET domain-containing protein	moderately similar to ( 279) AT3G56570 .g Symbols: .g SET domain-containing protein .g chr3:20958660-20961137 FORWARDmoderately similar to ( 306) loc_os01g65730 12001.m12682 protein SET domain containing protein, expressed no original description
Lus10007204	6	3.33333	4.19116	21.8108	8	7.66667	2.40966	22.0801	0	no original description
Lus10031937	6	6.33333	9.08807	32.9688	7	10.3333	6.95545	19.8956	NAC domain containing protein 32	no original description
Lus10009858	5	4.66667	85.4584	49.86	5.66667	6.33333	141.564	13.1704	NAC-domain protein 101	no original description
Lus10026538	79	150.667	32.8327	50.9265	91.6667	127.667	43.2117	156.61	SET domain-containing protein	moderately similar to ( 444) AT3G56570 .g Symbols: .g SET domain-containing protein .g chr3:20958660-20961137 FORWARDmoderately similar to ( 382) loc_os01g65730 12001.m12682 protein SET domain containing protein, expressed no original description
Lus10022965	9.33333	4.66667	11.8638	54.2133	7.33333	3.66667	7.9416	35.3317	NAC domain containing protein 38	no original description
Lus10008240	5.66667	6.33333	6.28655	73.905	6.66667	5	2.41576	8.46489	NAC 014	no original description
Lus10014342	1	2	1.04777	88.4708	1	2	1.03726	22.0859	NAC domain containing protein 52	no original description
Lus10031595	5	3.33333	12.5565	132.721	2.66667	2	13.4778	72.715	0	no original description
Lus10015743	2	1	6.28562	225.07	3	1.33333	3.11602	36.7107	NAC (No Apical Meristem) domain transcriptional regulator superfamily protein	no original description
Lus10022914	4.66667	7.33333	12.9168	545.274	4.33333	7.66667	13.1262	113.427	NAC domain containing protein 25	no original description
Lus10033676	162.667	149.333	325.634	795.872	174	183	355.603	391.097	NAC domain containing protein 50	no original description
Lus10010294	1.33333	2.66667	3.48698	983.905	1.66667	2.66667	7.94771	227.562	NAC domain containing protein 96	no original description
Lus10032724	212.333	225.333	491.344	1257.82	202.667	218	353.918	578.741	NAC domain containing protein 2	no original description
Lus10018810	232.667	326.667	252.817	3017.41	214.667	330.333	271.675	2249.4	NAC domain containing protein 2	no original description
Lus10015312	157.333	279.667	357.234	6772.31	126.333	345.667	414.463	3084.12	NAC domain containing protein 76	no original description

## Sheet: HSF
	M−Fn−L	M−Fn−R	S−Fn−L	S−Fn−R	M−Ly−L	M−Ly−R	S−Ly−L	S−Ly−R	annotation	Mapman
Lus10001008	1008.33	240.667	220.797	1.12174	829.333	255.667	179.506	38.9391	Chlorophyll A-B binding family protein	moderately similar to ( 249) AT5G47110 .g Symbols: .g lil3 protein, putative .g chr5:19134218-19135238 REVERSEmoderately similar to ( 247) loc_os02g03330 12002.m05683 protein lil3 protein, putative, expressed no original description
Lus10042646	26.6667	127	2.09461	1.12174	35	115.667	4.47437	4.79921	heat shock transcription factor B4	moderately similar to ( 257) AT1G46264 .g Symbols: AT-HSFB4, HSFB4 .g AT-HSFB4; DNA binding / transcription factor .g chr1:17224904-17226183 FORWARDmoderately similar to ( 209) loc_os08g36700 12008.m07658 protein AT-HSFB4, putative, expressed HSF_DNA-bind HSF HSF1 no original description
Lus10036062	1	231.333	2.44356	1.12174	1.66667	136	3.10694	1.04765	heat shock transcription factor B4	moderately similar to ( 210) AT1G46264 .g Symbols: AT-HSFB4, HSFB4 .g AT-HSFB4; DNA binding / transcription factor .g chr1:17224904-17226183 FORWARDmoderately similar to ( 212) loc_os07g44690 12007.m08690 protein AT-HSFB4, putative, expressed HSF_DNA-bind HSF HSF1 no original description
Lus10001133	6.33333	91	1.74924	1.12174	16.3333	108.667	3.45487	18.1227	heat shock transcription factor B4	moderately similar to ( 256) AT1G46264 .g Symbols: AT-HSFB4, HSFB4 .g AT-HSFB4; DNA binding / transcription factor .g chr1:17224904-17226183 FORWARDmoderately similar to ( 216) loc_os08g36700 12008.m07658 protein AT-HSFB4, putative, expressed HSF_DNA-bind HSF HSF1 no original description
Lus10008475	589.667	80.6667	184.811	14.2688	616	94.3333	102.887	33.0636	Nucleic acid-binding, OB-fold-like protein	weakly similar to ( 161) AT1G12800 .g Symbols: .g S1 RNA-binding domain-containing protein .g chr1:4361778-4365189 REVERSE no original description
Lus10000288	1202.67	121.667	495.241	26.1472	1200.33	132.333	365.821	131.11	Nucleic acid-binding, OB-fold-like protein	moderately similar to ( 499) AT1G12800 .g Symbols: .g S1 RNA-binding domain-containing protein .g chr1:4361778-4365189 REVERSEmoderately similar to ( 320) loc_os02g02390 12002.m05588 protein RNA binding protein, putative, expressedrpsA no original description
Lus10040147	1353	148.333	37.0799	58.0535	1308.67	158.667	52.4261	62.0401	Chlorophyll A-B binding family protein	moderately similar to ( 241) AT4G17600 .g Symbols: LIL3:1 .g LIL3:1; transcription factor .g chr4:9803759-9804714 FORWARDmoderately similar to ( 234) loc_os02g03330 12002.m05683 protein lil3 protein, putative, expressed no original description
Lus10011941	84	33.6667	150.043	113.434	46	38.3333	337.933	23.3236	heat shock transcription factor A2	moderately similar to ( 214) AT2G26150 .g Symbols: ATHSFA2, HSFA2 .g ATHSFA2; DNA binding / transcription factor .g chr2:11136052-11137217 FORWARDweakly similar to ( 198) loc_os10g28340 12010.m21892 protein heat shock factor protein HSF30, putative, expressed HSF_DNA-bind HSF HSF1 no original description
Lus10039376	1.33333	104	25.1051	154.084	4	111.333	38.6496	232.237	heat shock transcription factor A6B	moderately similar to ( 330) AT3G22830 .g Symbols: AT-HSFA6B, HSFA6B .g AT-HSFA6B; DNA binding / transcription factor .g chr3:8078981-8080895 FORWARDmoderately similar to ( 282) loc_os07g08140 12007.m05271 protein heat shock factor protein HSF30, putative, expressed HSF_DNA-bind HSF HSF1 no original description
Lus10011185	4.66667	27.3333	60.0175	170.736	6.33333	43.6667	57.4146	218.016	heat shock transcription factor B2A	weakly similar to ( 134) AT4G36990 .g Symbols: HSF4, HSFB1, AT-HSFB1, ATHSF4 .g HSF4 (HEAT SHOCK FACTOR 4); DNA binding / transcription factor/ transcription repressor .g chr4:17440660-17441706 FORWARDweakly similar to ( 140) loc_os08g43334 12008.m61974 protein heat shock factor protein 7, putative, expressed HSF_DNA-bind HSF HSF1 no original description
Lus10027627	15	20.6667	48.8635	245.139	9.66667	22.6667	93.8687	137.205	heat shock transcription factor A2	moderately similar to ( 219) AT2G26150 .g Symbols: ATHSFA2, HSFA2 .g ATHSFA2; DNA binding / transcription factor .g chr2:11136052-11137217 FORWARDmoderately similar to ( 207) loc_os03g53340 12003.m35580 protein heat shock factor protein HSF8, putative, expressed HSF_DNA-bind HSF HSF1 no original description
Lus10005925	2.33333	1.66667	45.2992	265.985	2.66667	2	10.7475	211.827	heat shock transcription factor A1E	very weakly similar to (92.8) AT3G02990 .g Symbols: ATHSFA1E, HSFA1E .g ATHSFA1E; DNA binding / transcription factor .g chr3:673614-675988 FORWARDvery weakly similar to (86.7) loc_os03g63750 12003.m11243 protein heat shock factor protein HSF8, putative, expressed HSF_DNA-bind HSF no original description
Lus10024508	118.333	94.3333	382.295	413.357	83	72.3333	325.069	602.374	winged-helix DNA-binding transcription factor family protein	moderately similar to ( 263) AT4G11660 .g Symbols: AT-HSFB2B, HSFB2B .g AT-HSFB2B; transcription factor/ transcription repressor .g chr4:7043006-7044227 FORWARDmoderately similar to ( 246) loc_os08g43334 12008.m61974 protein heat shock factor protein 7, putative, expressed HSF_DNA-bind HSF HSF1 no original description
Lus10023636	29.6667	40.3333	735.982	429.623	175.333	54.6667	1519.27	472.638	heat shock factor 1	moderately similar to ( 238) AT3G24520 .g Symbols: AT-HSFC1, HSFC1 .g AT-HSFC1; DNA binding / transcription factor .g chr3:8941455-8942531 FORWARDweakly similar to ( 191) loc_os02g13800 12002.m06626 protein heat shock factor protein 1, putative, expressed HSF_DNA-bind HSF HSF1 no original description
Lus10001591	25.6667	24.6667	69.7663	464.593	44.3333	31.3333	145.912	368.968	heat shock transcription factor A8	moderately similar to ( 243) AT1G67970 .g Symbols: AT-HSFA8, HSFA8 .g AT-HSFA8; DNA binding / transcription factor .g chr1:25484844-25486313 REVERSEmoderately similar to ( 206) loc_os03g63750 12003.m11243 protein heat shock factor protein HSF8, putative, expressed HSF_DNA-bind HSF HSF1 no original description
Lus10011065	139.333	139	200.708	467.36	133.333	164.667	265.285	409.583	heat shock transcription factor A1D	moderately similar to ( 303) AT1G32330 .g Symbols: ATHSFA1D, HSFA1D .g ATHSFA1D; DNA binding / transcription factor .g chr1:11657265-11660234 REVERSEmoderately similar to ( 306) loc_os03g63750 12003.m11243 protein heat shock factor protein HSF8, putative, expressed HSF_DNA-bind HSF HSF1 no original description
Lus10040911	157.333	202.667	369.527	526.689	154.333	244.333	350.466	581.146	heat shock factor 3	moderately similar to ( 323) AT3G02990 .g Symbols: ATHSFA1E, HSFA1E .g ATHSFA1E; DNA binding / transcription factor .g chr3:673614-675988 FORWARDmoderately similar to ( 339) loc_os03g63750 12003.m11243 protein heat shock factor protein HSF8, putative, expressed HSF_DNA-bind HSF HSF1 no original description
Lus10000959	977.333	124	31.4752	554.148	917.333	122.667	55.9371	645.082	Chlorophyll A-B binding family protein	weakly similar to ( 117) AT5G47110 .g Symbols: .g lil3 protein, putative .g chr5:19134218-19135238 REVERSEweakly similar to ( 129) loc_os02g03330 12002.m05683 protein lil3 protein, putative, expressed no original description
Lus10014369	40.3333	80.6667	79.2119	600.061	143.667	154	176.856	482	heat shock transcription factor A3	moderately similar to ( 290) AT5G03720 .g Symbols: AT-HSFA3, HSFA3 .g AT-HSFA3; DNA binding / transcription factor .g chr5:971913-973683 REVERSEmoderately similar to ( 202) loc_os02g32590 12002.m33703 protein heat shock factor protein 2, putative, expressed HSF_DNA-bind HSF HSF1 no original description
Lus10005420	114	175	210.298	664.385	119.667	161.667	175.728	522.865	heat shock transcription factor A4A	moderately similar to ( 328) AT4G18880 .g Symbols: AT-HSFA4A, HSF A4A .g AT-HSFA4A; DNA binding / transcription factor .g chr4:10347769-10349051 REVERSEmoderately similar to ( 262) loc_os01g54550 12001.m11618 protein heat shock factor, putative, expressed HSF_DNA-bind HSF HSF1 no original description
Lus10023866	35	38	104.666	680.348	169	81.3333	239.046	341.715	heat shock transcription factor A3	moderately similar to ( 280) AT5G03720 .g Symbols: AT-HSFA3, HSFA3 .g AT-HSFA3; DNA binding / transcription factor .g chr5:971913-973683 REVERSEweakly similar to ( 193) loc_os07g08140 12007.m05271 protein heat shock factor protein HSF30, putative, expressed HSF_DNA-bind HSF HSF1 no original description
Lus10015237	146	223.333	173.641	704.002	147	204.333	154.571	410.03	heat shock transcription factor A4A	moderately similar to ( 305) AT4G18880 .g Symbols: AT-HSFA4A, HSF A4A .g AT-HSFA4A; DNA binding / transcription factor .g chr4:10347769-10349051 REVERSEmoderately similar to ( 235) loc_os01g54550 12001.m11618 protein heat shock factor, putative, expressed HSF_DNA-bind HSF HSF1 no original description
Lus10034907	23.6667	38.3333	78.1487	709.231	30	40	139.946	693.613	heat shock transcription factor C1	moderately similar to ( 240) AT3G24520 .g Symbols: AT-HSFC1, HSFC1 .g AT-HSFC1; DNA binding / transcription factor .g chr3:8941455-8942531 FORWARDweakly similar to ( 194) loc_os02g13800 12002.m06626 protein heat shock factor protein 1, putative, expressed HSF_DNA-bind HSF HSF1 no original description
Lus10022546	191	115	840.194	870.616	183	135	656.993	507.112	winged-helix DNA-binding transcription factor family protein	moderately similar to ( 336) AT4G13980 .g Symbols: AT-HSFA5, HSFA5 .g AT-HSFA5; DNA binding / transcription factor .g chr4:8077519-8079247 REVERSEmoderately similar to ( 261) loc_os02g29340 12002.m08078 protein heat shock transcription factor like protein, putative, expressed HSF_DNA-bind HSF HSF1 no original description
Lus10018488	4	4.66667	17.4331	1025.62	1.33333	8.66667	18.7152	787.032	heat shock factor 4	weakly similar to ( 130) AT4G36990 .g Symbols: HSF4, HSFB1, AT-HSFB1, ATHSF4 .g HSF4 (HEAT SHOCK FACTOR 4); DNA binding / transcription factor/ transcription repressor .g chr4:17440660-17441706 FORWARDweakly similar to ( 134) loc_os08g43334 12008.m61974 protein heat shock factor protein 7, putative, expressed HSF_DNA-bind HSF HSF1 no original description
Lus10038874	844	105.333	1364.65	1261.77	457.333	91.3333	2266.2	1446.26	winged-helix DNA-binding transcription factor family protein	weakly similar to ( 150) AT5G62020 .g Symbols: AT-HSFB2A, HSFB2A .g AT-HSFB2A; DNA binding / transcription factor .g chr5:24916212-24917194 FORWARDweakly similar to ( 142) loc_os08g43334 12008.m61974 protein heat shock factor protein 7, putative, expressed HSF HSF_DNA-bind HSF1 no original description
Lus10003707	51.3333	76	128.087	1287.95	130	122.667	331.495	885.356	heat shock transcription factor A8	moderately similar to ( 242) AT1G67970 .g Symbols: AT-HSFA8, HSFA8 .g AT-HSFA8; DNA binding / transcription factor .g chr1:25484844-25486313 REVERSEmoderately similar to ( 202) loc_os03g63750 12003.m11243 protein heat shock factor protein HSF8, putative, expressed HSF_DNA-bind HSF HSF1 no original description
Lus10016634	133.667	105	380.544	1684.65	169.667	113.667	303.731	963.583	winged-helix DNA-binding transcription factor family protein	moderately similar to ( 352) AT4G13980 .g Symbols: AT-HSFA5, HSFA5 .g AT-HSFA5; DNA binding / transcription factor .g chr4:8077519-8079247 REVERSEmoderately similar to ( 284) loc_os02g29340 12002.m08078 protein heat shock transcription factor like protein, putative, expressed HSF_DNA-bind HSF HSF1 no original description
Lus10000312	138.667	126	301.888	1763.5	121.333	143	375.526	1055.48	heat shock transcription factor A1D	moderately similar to ( 332) AT1G32330 .g Symbols: ATHSFA1D, HSFA1D .g ATHSFA1D; DNA binding / transcription factor .g chr1:11657265-11660234 REVERSEmoderately similar to ( 336) loc_os03g63750 12003.m11243 protein heat shock factor protein HSF8, putative, expressed HSF_DNA-bind HSF HSF1 no original description
Lus10014994	500.667	159	849.271	2012.67	230	157.333	998.544	1736.84	heat shock transcription factor B2A	moderately similar to ( 224) AT5G62020 .g Symbols: AT-HSFB2A, HSFB2A .g AT-HSFB2A; DNA binding / transcription factor .g chr5:24916212-24917194 FORWARDmoderately similar to ( 221) loc_os08g43334 12008.m61974 protein heat shock factor protein 7, putative, expressed HSF_DNA-bind HSF HSF1 no original description
Lus10008007	240.667	102.333	878.764	2364.45	120.667	56	832.303	1452.01	winged-helix DNA-binding transcription factor family protein	moderately similar to ( 290) AT4G11660 .g Symbols: AT-HSFB2B, HSFB2B .g AT-HSFB2B; transcription factor/ transcription repressor .g chr4:7043006-7044227 FORWARDmoderately similar to ( 258) loc_os08g43334 12008.m61974 protein heat shock factor protein 7, putative, expressed HSF_DNA-bind HSF HSF1 no original description
Lus10029269	441.333	189	1485.87	2455.01	421	204	1121.01	2128.6	heat shock transcription factor A4A	moderately similar to ( 261) AT4G18880 .g Symbols: AT-HSFA4A, HSF A4A .g AT-HSFA4A; DNA binding / transcription factor .g chr4:10347769-10349051 REVERSEmoderately similar to ( 216) loc_os05g45410 12005.m08666 protein heat shock factor, putative, expressed HSF_DNA-bind HSF HSF1 no original description
Lus10022083	564.667	950.667	680.313	5919.08	287.667	759	584.794	2329.05	heat shock transcription factor A6B	moderately similar to ( 268) AT3G22830 .g Symbols: AT-HSFA6B, HSFA6B .g AT-HSFA6B; DNA binding / transcription factor .g chr3:8078981-8080895 FORWARDmoderately similar to ( 280) loc_os03g06630 12003.m101198 protein heat shock factor protein 1, putative, expressed HSF_DNA-bind HSF HSF1 no original description
Lus10009351	889.667	4101.67	11194.6	7896.47	542	4810	7885.24	12298.5	heat shock factor 4	moderately similar to ( 208) AT4G36990 .g Symbols: HSF4, HSFB1, AT-HSFB1, ATHSF4 .g HSF4 (HEAT SHOCK FACTOR 4); DNA binding / transcription factor/ transcription repressor .g chr4:17440660-17441706 FORWARDweakly similar to ( 170) loc_os09g28354 12009.m05986 protein heat shock factor protein 4, putative, expressed HSF_DNA-bind HSF HSF1 no original description
Lus10019348	454	2431	4789.49	8301.3	264.333	2508.33	4505.88	6765.81	heat shock factor 4	moderately similar to ( 214) AT4G36990 .g Symbols: HSF4, HSFB1, AT-HSFB1, ATHSF4 .g HSF4 (HEAT SHOCK FACTOR 4); DNA binding / transcription factor/ transcription repressor .g chr4:17440660-17441706 FORWARDweakly similar to ( 177) loc_os09g28354 12009.m05986 protein heat shock factor protein 4, putative, expressed HSF_DNA-bind HSF HSF1 no original description
Lus10007318	583.333	327.333	1038.26	16792.2	556.333	327.333	1039.67	8166.63	heat shock transcription factor A4A	moderately similar to ( 318) AT4G18880 .g Symbols: AT-HSFA4A, HSF A4A .g AT-HSFA4A; DNA binding / transcription factor .g chr4:10347769-10349051 REVERSEmoderately similar to ( 247) loc_os01g54550 12001.m11618 protein heat shock factor, putative, expressed HSF_DNA-bind HSF HSF1 no original description
Lus10014698	55.3333	227.667	85.3925	18491.1	26	140	76.0199	5111.51	heat shock transcription factor A6B	moderately similar to ( 290) AT3G22830 .g Symbols: AT-HSFA6B, HSFA6B .g AT-HSFA6B; DNA binding / transcription factor .g chr3:8078981-8080895 FORWARDmoderately similar to ( 279) loc_os07g08140 12007.m05271 protein heat shock factor protein HSF30, putative, expressed HSF_DNA-bind HSF HSF1 no original description
Lus10013797	22.6667	5	74.6447	19240.9	21.3333	11.3333	96.5036	11493	heat shock transcription factor A2	moderately similar to ( 275) AT2G26150 .g Symbols: ATHSFA2, HSFA2 .g ATHSFA2; DNA binding / transcription factor .g chr2:11136052-11137217 FORWARDmoderately similar to ( 235) loc_os10g28340 12010.m21892 protein heat shock factor protein HSF30, putative, expressed HSF_DNA-bind HSF HSF1 no original description
Lus10039134	34	2.33333	395.492	20837.4	11.6667	4.33333	428.7	5370.1	heat shock transcription factor A2	moderately similar to ( 246) AT2G26150 .g Symbols: ATHSFA2, HSFA2 .g ATHSFA2; DNA binding / transcription factor .g chr2:11136052-11137217 FORWARDmoderately similar to ( 211) loc_os07g08140 12007.m05271 protein heat shock factor protein HSF30, putative, expressed HSF_DNA-bind HSF HSF1 no original description
Lus10000492	33.6667	84.3333	257.664	62221.8	34.6667	81.3333	285.19	9198.39	heat shock transcription factor A6B	moderately similar to ( 278) AT3G22830 .g Symbols: AT-HSFA6B, HSFA6B .g AT-HSFA6B; DNA binding / transcription factor .g chr3:8078981-8080895 FORWARDmoderately similar to ( 268) loc_os07g08140 12007.m05271 protein heat shock factor protein HSF30, putative, expressed HSF_DNA-bind HSF HSF1 no original description
