# Supplementary material for: Comprehensive Analysis of Differentially Expressed Genes and Epigenetic Modification-Related Expression Variation Induced by Saline Stress at Seedling Stage in Fiber and Oil Flax, Linum usitatissimum L
Source: Plants (Basel). 2022 Aug 5;11(15):2053. doi: 10.3390/plants11152053 (PMC9370232; doi:10.3390/plants11152053)
Supplement: Supplementary file 1 [file plants-11-02053-s001.zip › Supplementary Table S5.xlsx]

## Sheet: Ionic transport
	M−Fn−L	M−Fn−R	S−Fn−L	S−Fn−R	M−Ly−L	M−Ly−R	S−Ly−L	S−Ly−R	annotation
Lus10036716	16.6667	24.3333	321.407	15.686	1	3	17.0714	11.0637	voltage dependent anion channel 1
Lus10039093	2.33333	2.66667	17.1634	1.73386	1	1	1.39672	1.3822	Copper transport protein family
Lus10009758	150.667	158.333	368.127	242.14	132.667	156	137.624	159.593	Polyketide cyclase / dehydrase and lipid transport protein
Lus10033098	11.3333	13.6667	187.776	52.5919	1	2	7.33619	8.99774	voltage dependent anion channel 1
Lus10013271	3490	3448.67	7967.91	7786.54	1998.67	1982.33	1777.21	2702.53	voltage dependent anion channel 1
Lus10021687	18.3333	16.3333	233.704	131.814	4	5.33333	4.88362	9.66691	Copper transport protein family
Lus10015357	775.333	791.667	875.738	831.193	438.667	477.667	200.1	296.653	voltage dependent anion channel 1
Lus10019023	82.6667	91	31.0196	67.1479	65.3333	70.3333	22.7155	25.9149	Got1/Sft2-like vescicle transport protein family
Lus10039619	217.333	201	63.6353	109.212	175.333	192.333	65.0163	67.7658	Got1/Sft2-like vescicle transport protein family
Lus10007739	531.667	527	220.888	351.014	323.667	321.333	187.208	232.576	voltage dependent anion channel 2
Lus10029537	161.333	156.333	40.0767	74.7229	45.3333	52	12.2305	12.054	Got1/Sft2-like vescicle transport protein family
Lus10005090	1561.67	1397	1279.81	1298.61	1464.67	1959.67	3499.75	1727.12	auxin transport protein (BIG)
Lus10006678	1.66667	2	1.12174	14.9998	84	66.6667	97.0452	104.779	C4-dicarboxylate transporter/malic acid transport protein
Lus10042651	83.6667	81	168.231	155.317	199	199.333	296.152	284.241	Polyketide cyclase / dehydrase and lipid transport protein
Lus10012539	984	958.667	864.257	752.775	434.333	484.667	754.13	1599.46	secE/sec61-gamma protein transport protein
Lus10026704	388.333	359	384.123	315.116	349	278.667	533.594	671.924	Got1/Sft2-like vescicle transport protein family
Lus10041552	554.667	532.667	471.71	433.239	496	474.667	687.896	1512.54	secE/sec61-gamma protein transport protein
Lus10005121	173.333	199.333	472.405	293.349	214	229.333	314.262	293.306	Mechanosensitive ion channel protein
Lus10007203	101	101.667	499.363	320.772	217	201.333	196.598	266.357	Polyketide cyclase / dehydrase and lipid transport protein
Lus10025494	317	333.333	551.618	385.822	332.667	311.667	466.745	751.58	Got1/Sft2-like vescicle transport protein family
Lus10035027	22.6667	24.3333	94.9561	47.9697	67	42.6667	147.733	233.227	Copper transport protein family
Lus10037212	18	18.3333	36.8799	38.1867	20	28.6667	89.3121	129.568	voltage dependent anion channel 1
Lus10021724	56	64.6667	191.696	183.59	72	67	954.569	906.943	Polyketide cyclase / dehydrase and lipid transport protein
Lus10018822	338	332.667	123.985	187.129	386.667	384.667	322.4	310.485	Mechanosensitive ion channel protein
Lus10003634	284.667	264.667	129.609	188.292	316	273.333	217.629	230.218	Transport protein particle (TRAPP) component
Lus10018981	76	70.3333	2.58253	30.5249	152.667	149	42.6293	60.1602	Transport protein particle (TRAPP) component
Lus10039224	278	319	104.366	176.124	240.333	267	265.651	234.266	Copper transport protein family
Lus10001721	242.667	226.667	20.7252	70.6256	197.667	153.667	158.571	209.286	Transport protein particle (TRAPP) component
Lus10004135	123	129	41.9927	62.6697	107.333	94.3333	115.272	150.045	Transport protein particle (TRAPP) component
Lus10006060	464.333	441.667	200.092	236.502	310.333	292.667	224.29	345.653	Transport protein particle (TRAPP) component
Lus10011539	619	574	157.677	453.248	509.333	514.667	403.956	350.893	voltage dependent anion channel 2
Lus10019284	921.667	1008	263.151	650.805	514.333	527.333	391.363	421.991	voltage dependent anion channel 2
Lus10006118	43.6667	47.3333	85.3282	80.1274	148.667	122.667	46.8033	55.576	secE/sec61-gamma protein transport protein
Lus10010086	68	57	141.097	134.832	206.333	184.333	104.812	106.508	Polyketide cyclase / dehydrase and lipid transport protein
Lus10010555	46	53.3333	76.2461	39.3819	352.333	350.667	64.3107	100.496	secE/sec61-gamma protein transport protein
Lus10030538	12.3333	12	63.2664	3.10626	1425	1245.67	148.186	155.694	inorganic carbon transport protein-related
Lus10010061	27.3333	39	1.12174	1.73386	794.667	641.333	135.452	112.605	cyclic nucleotide-gated cation channel 4
Lus10033832	75	74	44.1398	31.1868	133	124	56.2814	82.915	Transport protein particle (TRAPP) component
