# Supplementary material for: Comprehensive Analysis of Differentially Expressed Genes and Epigenetic Modification-Related Expression Variation Induced by Saline Stress at Seedling Stage in Fiber and Oil Flax, Linum usitatissimum L
Source: Plants (Basel). 2022 Aug 5;11(15):2053. doi: 10.3390/plants11152053 (PMC9370232; doi:10.3390/plants11152053)
Supplement: Supplementary file 1 [file plants-11-02053-s001.zip › Supplementary Table S6.xlsx]

## Sheet: DNA methylation
	M−Fn−L	M−Fn−R	S−Fn−L	S−Fn−R	M−Ly−L	M−Ly−R	S−Ly−L	S−Ly−R	annotation	Mapman
Lus10033679	1	1	1.04777	1.12174	1	1	1.03726	1.04765	chromomethylase 3	very weakly similar to (90.9) AT1G69770 .g Symbols: CMT3 .g CMT3 (chromomethylase 3); DNA (cytosine-5-)-methyltransferase .g chr1:26248496-26253519 REVERSEBAH_plantDCM_I no original description
Lus10026024	35.6667	312	9.08115	7.20296	56.6667	319.667	17.6071	55.6402	chromomethylase 3	highly similar to ( 734) AT1G69770 .g Symbols: CMT3 .g CMT3 (chromomethylase 3); DNA (cytosine-5-)-methyltransferase .g chr1:26248496-26253519 REVERSEhighly similar to ( 755) CMT1_MAIZE DNA (cytosine-5)-methyltransferase 1 (EC 2.1.1.37) (Chromomethylase 1) (Zea methyltransferase2) (Zmet2) (DNA cytosine methyltransferase MET2a) - Zea mays (Maize)highly similar to ( 749) loc_os03g12570 12003.m06707…
Lus10017720	4.33333	273.667	2.79165	10.3306	13	253.333	1.03726	27.147	chromomethylase 3	highly similar to ( 761) AT1G69770 .g Symbols: CMT3 .g CMT3 (chromomethylase 3); DNA (cytosine-5-)-methyltransferase .g chr1:26248496-26253519 REVERSEhighly similar to ( 750) CMT1_MAIZE DNA (cytosine-5)-methyltransferase 1 (EC 2.1.1.37) (Chromomethylase 1) (Zea methyltransferase2) (Zmet2) (DNA cytosine methyltransferase MET2a) - Zea mays (Maize)highly similar to ( 735) loc_os03g12570 12003.m06707…
Lus10043099	107	73.6667	28.9964	10.982	103.333	67.6667	29.0339	39.2838	S-adenosyl-L-methionine-dependent methyltransferases superfamily protein	weakly similar to ( 151) AT3G17310 .g Symbols: .g methyltransferase family protein .g chr3:5909294-5912838 REVERSEweakly similar to ( 109) loc_os05g04330 12005.m64178 protein DNA methyltransferase DMT106, putative, expressed no original description
Lus10014315	42	359.667	27.9354	30.3064	45	256.333	25.6157	116.002	chromomethylase 3	highly similar to ( 737) AT1G69770 .g Symbols: CMT3 .g CMT3 (chromomethylase 3); DNA (cytosine-5-)-methyltransferase .g chr1:26248496-26253519 REVERSEhighly similar to ( 755) CMT1_MAIZE DNA (cytosine-5)-methyltransferase 1 (EC 2.1.1.37) (Chromomethylase 1) (Zea methyltransferase2) (Zmet2) (DNA cytosine methyltransferase MET2a) - Zea mays (Maize)highly similar to ( 737) loc_os03g12570 12003.m06707…
Lus10004295	64.6667	556.333	48.2755	45.1394	124.667	475.667	48.8541	84.7724	methyltransferase 1	nearly identical (1745) AT5G49160 .g Symbols: MET1, MET2, METI, DDM2, DMT01, DMT1 .g MET1 (METHYLTRANSFERASE 1); methyltransferase .g chr5:19932501-19938186 FORWARDmoderately similar to ( 201) CMT2_MAIZE DNA (cytosine-5)-methyltransferase 2 (EC 2.1.1.37) (Chromomethylase 2) (Zea methyltransferase5) (Zmet5) (DNA cytosine methyltransferase MET5) - Zea mays (Maize)highly similar to ( 671) loc_os07g0…
Lus10019220	161.667	380	93.9414	51.3208	205.333	317.667	83.0732	98.2118	methyltransferase 1	nearly identical (1653) AT5G49160 .g Symbols: MET1, MET2, METI, DDM2, DMT01, DMT1 .g MET1 (METHYLTRANSFERASE 1); methyltransferase .g chr5:19932501-19938186 FORWARDweakly similar to ( 200) CMT3_MAIZE DNA (cytosine-5)-methyltransferase 3 (EC 2.1.1.37) (Chromomethylase 3) (DNA methyltransferase 105) - Zea mays (Maize)highly similar to ( 669) loc_os07g08500 12007.m05306 protein expressed proteinBAH_…
Lus10026955	182	149.667	98.2136	58.7476	208.667	136.333	54.0454	120.81	DNA methyltransferase-2	highly similar to ( 507) AT5G25480 .g Symbols: DNMT2 .g DNMT2 (DNA METHYLTRANSFERASE-2); DNA binding .g chr5:8870069-8872199 REVERSEmoderately similar to ( 311) loc_os01g42630 12001.m10527 protein expressed protein Cyt_C5_DNA_methylase DNA_methylase Dcm no original description
Lus10020155	149	112.667	70.927	63.9564	162	117.667	50.1414	75.5421	DNA methyltransferase-2	moderately similar to ( 429) AT5G25480 .g Symbols: DNMT2 .g DNMT2 (DNA METHYLTRANSFERASE-2); DNA binding .g chr5:8870069-8872199 REVERSEmoderately similar to ( 315) loc_os01g42630 12001.m10527 protein expressed protein Cyt_C5_DNA_methylase Dcm DNA_methylase no original description
Lus10032652	265.333	198	186.195	86.2468	265	219	191.757	108.389	S-adenosyl-L-methionine-dependent methyltransferases superfamily protein	moderately similar to ( 469) AT3G17310 .g Symbols: .g methyltransferase family protein .g chr3:5909294-5912838 REVERSEmoderately similar to ( 416) loc_os05g04330 12005.m64178 protein DNA methyltransferase DMT106, putative, expressed no original description
Lus10032136	163	131	29.3845	95.1844	151.667	134.333	33.8417	106.979	domains rearranged methyltransferase 2	highly similar to ( 566) AT5G14620 .g Symbols: DRM2, DMT7 .g DRM2 (DOMAINS REARRANGED METHYLTRANSFERASE 2); N-methyltransferase .g chr5:4715429-4718578 REVERSEhighly similar to ( 555) loc_os03g02010 12003.m34978 protein DNA cytosine methyltransferase Zmet3, putative, expressed no original description
Lus10014552	203	150.667	60.517	139.275	182.333	134.667	67.7359	103.158	domains rearranged methyltransferase 2	highly similar to ( 553) AT5G15380 .g Symbols: DRM1 .g DRM1 (domains rearranged methylase 1); DNA (cytosine-5-)-methyltransferase .g chr5:4991347-4994826 FORWARDhighly similar to ( 543) loc_os03g02010 12003.m34978 protein DNA cytosine methyltransferase Zmet3, putative, expressed no original description
Lus10010796	221.333	257.667	399.661	461.252	270.333	257	281.191	345.02	chromomethylase 2	highly similar to ( 756) AT4G19020 .g Symbols: CMT2 .g CMT2 (chromomethylase 2); DNA binding / chromatin binding .g chr4:10414526-10420936 FORWARDhighly similar to ( 635) CMT1_MAIZE DNA (cytosine-5)-methyltransferase 1 (EC 2.1.1.37) (Chromomethylase 1) (Zea methyltransferase2) (Zmet2) (DNA cytosine methyltransferase MET2a) - Zea mays (Maize)highly similar to ( 608) loc_os03g12570 12003.m06707 pro…

## Sheet: Histone acetylation
	M−Fn−L	M−Fn−R	S−Fn−L	S−Fn−R	M−Ly−L	M−Ly−R	S−Ly−L	S−Ly−R	annotation	Mapman
Lus10025567	80.3333	76.6667	19.5649	72.6463	69.6667	76.6667	28.6465	132.741	Acyl-CoA N-acyltransferases (NAT) superfamily protein	moderately similar to ( 208) AT1G03650 .g Symbols: .g GCN5-related N-acetyltransferase (GNAT) family protein .g chr1:910249-911103 REVERSEweakly similar to ( 160) loc_os10g35680 12010.m06388 protein acetyltransferase, putative, expressed no original description
Lus10019311	27.3333	47.6667	41.2024	75.2506	26	49.6667	30.8234	38.0318	MRG family protein	very weakly similar to (81.6) AT4G37280 .g Symbols: .g MRG family protein .g chr4:17546748-17549362 REVERSE no original description
Lus10011511	178.667	242.667	71.9738	83.4752	142	243.667	60.5364	84.3511	MRG family protein	moderately similar to ( 357) AT4G37280 .g Symbols: .g MRG family protein .g chr4:17546748-17549362 REVERSEmoderately similar to ( 305) loc_os11g34300 12011.m28883 protein chromatin modification-related protein EAF3, putative, expressed MRG no original description
Lus10032700	1.66667	1	1.04777	98.052	1.66667	1.33333	3.44691	25.9647	histone acetyltransferase of the GNAT family 2	moderately similar to ( 314) AT5G56740 .g Symbols: HAG2, HAC7, HAG02, HAC07 .g HAG2 (HISTONE ACETYLTRANSFERASE OF THE GNAT FAMILY 2); H4 histone acetyltransferase/ histone acetyltransferase .g chr5:22953009-22955577 REVERSEmoderately similar to ( 228) HAT1_ORYSA Probable acetyltransferase type B catalytic subunit (EC 2.3.1.48) (HAT B) - Oryza sativa (Rice)moderately similar to ( 228) loc_os09g178…
Lus10017553	373	253.667	282.514	126.005	393	257.333	229.606	195.769	homolog of yeast ADA2 2A	highly similar to ( 567) AT4G16420 .g Symbols: ADA2B, PRZ1 .g ADA2B (HOMOLOG OF YEAST ADA2 2B); DNA binding / transcription coactivator/ transcription factor .g chr4:9262805-9265775 REVERSEhighly similar to ( 527) loc_os03g53960 12003.m10361 protein transcriptional adaptor, putative, expressed COG5114 ZZ_ADA2 no original description
Lus10000540	425	176.667	196.375	143.648	496.667	193.667	183.472	139.056	homolog of yeast ADA2 2A	highly similar to ( 515) AT4G16420 .g Symbols: ADA2B, PRZ1 .g ADA2B (HOMOLOG OF YEAST ADA2 2B); DNA binding / transcription coactivator/ transcription factor .g chr4:9262805-9265775 REVERSEmoderately similar to ( 479) loc_os03g53960 12003.m10361 protein transcriptional adaptor, putative, expressed COG5114 ZZ_ADA2 no original description
Lus10019312	94.6667	158	100.587	158.08	101.667	162.333	112.951	95.1145	MRG family protein	moderately similar to ( 229) AT4G37280 .g Symbols: .g MRG family protein .g chr4:17546748-17549362 REVERSEmoderately similar to ( 216) loc_os04g01130 12004.m05433 protein chromatin modification-related protein EAF3, putative, expressed MRG no original description
Lus10014792	346.667	337.333	372.205	218.269	303	333	541.255	302.148	radical SAM domain-containing protein / GCN5-related N-acetyltransferase (GNAT) family protein	nearly identical (1019) AT5G50320 .g Symbols: ELO3, HAG3, HAC8 .g ELO3 (ELONGATA 3); histone acetyltransferase .g chr5:20481200-20484811 REVERSEhighly similar to ( 984) ELP3_ORYSA Probable histone acetyltransferase ELP3 (EC 2.3.1.48) (Elongator component 3) (Elongation protein 3) - Oryza sativa (Rice)highly similar to ( 984) loc_os04g40840 12004.m09064 protein histone acetyltransferase ELP3, puta…
Lus10012916	148.333	326	241.555	391.059	176.333	367	269.623	257.926	histone acetyltransferase of the GNAT family 2	highly similar to ( 506) AT5G56740 .g Symbols: HAG2, HAC7, HAG02, HAC07 .g HAG2 (HISTONE ACETYLTRANSFERASE OF THE GNAT FAMILY 2); H4 histone acetyltransferase/ histone acetyltransferase .g chr5:22953009-22955577 REVERSEmoderately similar to ( 403) HAT1_ORYSA Probable acetyltransferase type B catalytic subunit (EC 2.3.1.48) (HAT B) - Oryza sativa (Rice)moderately similar to ( 403) loc_os09g17850 1…
Lus10002718	259.667	221.333	186.506	424	274.667	217.333	208.455	354.851	histone acetyltransferase of the GNAT family 1	highly similar to ( 569) AT3G54610 .g Symbols: HAT1, GCN5, HAG1, HAC3, HAG01, BGT .g GCN5; DNA binding / H3 histone acetyltransferase/ histone acetyltransferase .g chr3:20213593-20217375 FORWARDhighly similar to ( 541) loc_os10g28040 12010.m05687 protein general control of amino acid synthesis protein 5-like 2, putative, expressed BROMO COG5076 Bromodomain no original description
Lus10008553	1054	1025	2133.21	489.873	1278	974.333	1105.67	812.051	HAC13 protein (HAC13)	nearly identical (1268) AT1G32750 .g Symbols: HAF01, HAF1, HAC13, GTD1, TAF1 .g HAF01; DNA binding / histone acetyltransferase .g chr1:11846385-11856261 REVERSEnearly identical (1134) loc_os06g43790 12006.m08909 protein HAF01, putative, expressed TAF1 BROMO Bromodomain no original description
Lus10001102	214.667	232	252.122	516.321	188	220.667	359.638	312.361	radical SAM domain-containing protein / GCN5-related N-acetyltransferase (GNAT) family protein	nearly identical (1013) AT5G50320 .g Symbols: ELO3, HAG3, HAC8 .g ELO3 (ELONGATA 3); histone acetyltransferase .g chr5:20481200-20484811 REVERSEhighly similar to ( 981) ELP3_ORYSA Probable histone acetyltransferase ELP3 (EC 2.3.1.48) (Elongator component 3) (Elongation protein 3) - Oryza sativa (Rice)highly similar to ( 981) loc_os04g40840 12004.m09064 protein histone acetyltransferase ELP3, puta…
Lus10027579	1179.33	1102.67	2287.52	652.139	1371.33	1071.33	1155.32	967.549	HAC13 protein (HAC13)	nearly identical (1242) AT1G32750 .g Symbols: HAF01, HAF1, HAC13, GTD1, TAF1 .g HAF01; DNA binding / histone acetyltransferase .g chr1:11846385-11856261 REVERSEnearly identical (1125) loc_os06g43790 12006.m08909 protein HAF01, putative, expressed TAF1 BROMO Bromodomain no original description
Lus10001302	761	453.333	1070.24	766.562	638	449.667	1367.06	665.622	histone acetyltransferase of the MYST family 1	highly similar to ( 744) AT5G64610 .g Symbols: HAM1 .g HAM1 (HISTONE ACETYLTRANSFERASE OF THE MYST FAMILY 1); H3/H4 histone acetyltransferase/ histone acetyltransferase/ nucleic acid binding / zinc ion binding .g chr5:25828333-25830503 REVERSEhighly similar to ( 711) MYST1_ORYSA Putative MYST-like histone acetyltransferase 1 (EC 2.3.1.48) - Oryza sativa (Rice)highly similar to ( 711) loc_os07g433…
Lus10006383	389	271.333	483.287	1053.81	325	296	423.844	540.27	homolog of yeast ADA2 2A	highly similar to ( 533) AT3G07740 .g Symbols: ADA2A, ATADA2A, HAC10, HXA02, HXA2 .g ADA2A (HOMOLOG OF YEAST ADA2 2A); DNA binding / transcription factor/ zinc ion binding .g chr3:2470014-2472635 REVERSEhighly similar to ( 548) loc_os03g53960 12003.m10361 protein transcriptional adaptor, putative, expressed COG5114 ZZ_ADA2 no original description
Lus10012707	695.667	351.333	1296.35	1172.65	597.333	339.667	1630.18	754.706	histone acetyltransferase of the MYST family 1	highly similar to ( 747) AT5G64610 .g Symbols: HAM1 .g HAM1 (HISTONE ACETYLTRANSFERASE OF THE MYST FAMILY 1); H3/H4 histone acetyltransferase/ histone acetyltransferase/ nucleic acid binding / zinc ion binding .g chr5:25828333-25830503 REVERSEhighly similar to ( 717) MYST1_ORYSA Putative MYST-like histone acetyltransferase 1 (EC 2.3.1.48) - Oryza sativa (Rice)highly similar to ( 717) loc_os07g433…
Lus10034780	846	660	1912.85	1634.26	925	644	1360.03	1277.67	histone acetyltransferase of the CBP family 1	nearly identical (1583) AT1G79000 .g Symbols: HAC1, PCAT2, ATHPCAT2 .g HAC1 (HISTONE ACETYLTRANSFERASE OF THE CBP FAMILY 1); H3/H4 histone acetyltransferase/ histone acetyltransferase/ transcription cofactor .g chr1:29716933-29723984 REVERSEnearly identical (1334) loc_os02g04490 12002.m05798 protein HAC1, putative, expressed DUF906 ZnF_TAZ no original description
Lus10033321	553.667	461.333	1397.54	1897.64	586.667	462	909.283	1401.47	histone acetyltransferase of the CBP family 1	nearly identical (1650) AT1G79000 .g Symbols: HAC1, PCAT2, ATHPCAT2 .g HAC1 (HISTONE ACETYLTRANSFERASE OF THE CBP FAMILY 1); H3/H4 histone acetyltransferase/ histone acetyltransferase/ transcription cofactor .g chr1:29716933-29723984 REVERSEnearly identical (1352) loc_os02g04490 12002.m05798 protein HAC1, putative, expressed DUF906 ZnF_TAZ no original description
Lus10033319	351.333	336.667	735.045	2235.59	370.667	317.333	430.684	1296.84	histone acetyltransferase of the CBP family 1	nearly identical (1811) AT1G79000 .g Symbols: HAC1, PCAT2, ATHPCAT2 .g HAC1 (HISTONE ACETYLTRANSFERASE OF THE CBP FAMILY 1); H3/H4 histone acetyltransferase/ histone acetyltransferase/ transcription cofactor .g chr1:29716933-29723984 REVERSEnearly identical (1487) loc_os02g04490 12002.m05798 protein HAC1, putative, expressed DUF906 ZnF_TAZ no original description
