# Supplementary material for: Comprehensive Analysis of Differentially Expressed Genes and Epigenetic Modification-Related Expression Variation Induced by Saline Stress at Seedling Stage in Fiber and Oil Flax, Linum usitatissimum L
Source: Plants (Basel). 2022 Aug 5;11(15):2053. doi: 10.3390/plants11152053 (PMC9370232; doi:10.3390/plants11152053)
Supplement: Supplementary file 1 [file plants-11-02053-s001.zip › Supplementary Table S7.xlsx]

## Sheet: Sheet1
Primer sequence
Gene ID	Fprimer	Rprimer
Actin	TCCAGGCCGTTCTTTCTCTA	CTGTAAGGTCACGACCAGCA
Lus10017829	ATGTTCCGCCACAAGGATAATA	ATCAAAAGTCCTTCTGCCAATC
Lus10041052	GTGTTTTTGGGAAGCTACTACG	TGATCTCATCCAAACCACTGAA
Lus10034885	CTTGGATCAGCTTGCCAATATC	CTGAGTAGTTTGCTCTTCCTCA
Lus10022497	CAGCGTAGGATCATCTTCTTCT	GCCTGAGTTGGTTTAGACCTAA
Lus10019665	AGAGAAGAAGAAAACAGGGGAG	CGGTGAAGTCAAAGAACGAAAT
